# Supplementary material for: Understanding variability in maize yield response to phosphorus fertilizer in Africa and China: Meta-analysis
Source: Research Square preprint supplement (doi:10.21203/rs.3.rs-1672011/v1), 2022-06-02
Supplement: Supplementary file 1 [file 0a3601cd46ed45015dd78bb9.xlsx]

## Sheet: A. Data base
Reference No.	Author	Location	Replication	Experimental year	Soil pH	Soil Olsen-P (mg kg-1)	MAP (mm/year)	P used	NK	NPK	RNK	RNK	Number of set data	W1	W2	Weight	Effect size
1	Njui NA et al	Kenya	3	1997	4.47	1.74	N/A	52.4017	850	1940	3	3	4	1.5	0.375	2.66667	0.825207
1	Njui NA et al	Kenya	3	1997	4.47	1.74	N/A	8.73362	850	1250	3	3	4	1.5	0.375	2.66667	0.385662
1	Njui NA et al	Kenya	3	1997	4.47	1.74	N/A	17.4672	850	2650	3	3	4	1.5	0.375	2.66667	1.13708
1	Njui NA et al	Kenya	3	1997	4.47	1.74	N/A	26.2009	850	2560	3	3	4	1.5	0.375	2.66667	1.10253
1	Njui NA et al	Kenya	3	1997	4.47	1.74	N/A	34.9345	770	2170	3	3	4	1.5	0.375	2.66667	1.03609
1	Njui NA et al	Kenya	3	1997	4.47	1.74	N/A	13.1004	770	2390	3	3	4	1.5	0.375	2.66667	1.13266
1	Njui NA et al	Kenya	3	1997	4.47	1.74	N/A	17.4672	770	4590	3	3	4	1.5	0.375	2.66667	1.78524
1	Njui NA et al	Kenya	3	1997	4.47	1.74	N/A	4.36681	770	5120	3	3	4	1.5	0.375	2.66667	1.89452
1	Njui NA et al	Kenya	3	1997	4.47	1.74	N/A	8.73362	1080	5110	3	3	3	1.5	0.5	2	1.55424
1	Njui NA et al	Kenya	3	1997	4.47	1.74	N/A	13.1004	1080	5540	3	3	3	1.5	0.5	2	1.63503
1	Njui NA et al	Kenya	3	1997	4.47	1.74	N/A	26.2009	1080	6220	3	3	3	1.5	0.5	2	1.75081
1	Njui NA et al	Kenya	3	1997	4.47	1.74	N/A	4.36681	740	5500	3	3	3	1.5	0.5	2	2.00585
1	Njui NA et al	Kenya	3	1997	4.47	1.74	N/A	8.73362	740	5340	3	3	3	1.5	0.5	2	1.97633
1	Njui NA et al	Kenya	3	1997	4.47	1.74	N/A	13.1004	740	7130	3	3	3	1.5	0.5	2	2.26542
2	Hadgu et al.	Ethiopia	3	2011	8	4.56	590	4.36681	1798	6040	3	3	6	1.5	0.25	4	1.21173
2	Hadgu et al.	Ethiopia	3	2011	8	4.56	590	8.73362	1797.8	2983.3	3	3	6	1.5	0.25	4	0.506466
2	Hadgu et al.	Ethiopia	3	2011	8	4.56	590	13.1004	1797.8	3817.2	3	3	6	1.5	0.25	4	0.752953
2	Hadgu et al.	Ethiopia	3	2011	8	4.56	590	17.4672	1797.8	3324.4	3	3	6	1.5	0.25	4	0.614726
2	Hadgu et al.	Ethiopia	3	2011	8	4.56	590	21.8341	1797.8	3218.6	3	3	6	1.5	0.25	4	0.582383
2	Hadgu et al.	Ethiopia	3	2011	8	4.56	590	26.2009	1797.8	3069.2	3	3	6	1.5	0.25	4	0.534853
3	Materechera et al	South Africa	4	2001	7.8	3.4	378.2	8.73362	1806	3864.9	4	4	3	2	0.666667	1.5	0.760821
3	Materechera et al	South Africa	4	2001	7.8	3.4	378.2	17.4672	1806	4190	4	4	3	2	0.666667	1.5	0.841586
3	Materechera et al	South Africa	4	2001	7.8	3.4	378.2	13.1004	1806	4963.1	4	4	3	2	0.666667	1.5	1.01092
3	Materechera et al	South Africa	4	2002	7.8	3.4	501	8.73362	2078.3	3001.5	4	4	3	2	0.666667	1.5	0.367562
3	Materechera et al	South Africa	4	2002	7.8	3.4	501	17.4672	2078.3	3948.8	4	4	3	2	0.666667	1.5	0.641861
3	Materechera et al	South Africa	4	2002	7.8	3.4	501	26.2009	2078.3	4181	4	4	3	2	0.666667	1.5	0.699
4	Onasanya et al	Nigria	3	2007	5.04	0.13	N/A	8.73362	3080	4590	3	3	9	1.5	0.166667	6	0.39895
4	Onasanya et al	Nigria	3	2007	5.04	0.13	N/A	17.4672	3080	5120	3	3	9	1.5	0.166667	6	0.508225
4	Onasanya et al	Nigria	3	2007	5.04	0.13	N/A	26.2009	3080	5110	3	3	9	1.5	0.166667	6	0.50627
4	Onasanya et al	Nigria	3	2007	5.04	0.13	N/A	8.73362	3080	5540	3	3	9	1.5	0.166667	6	0.587065
4	Onasanya et al	Nigria	3	2007	5.04	0.13	N/A	17.4672	3080	6220	3	3	9	1.5	0.166667	6	0.70284
4	Onasanya et al	Nigria	3	2007	5.04	0.13	N/A	26.2009	3080	5500	3	3	9	1.5	0.166667	6	0.579818
4	Onasanya et al	Nigria	3	2007	5.04	0.13	N/A	8.73362	3080	5340	3	3	9	1.5	0.166667	6	0.550296
4	Onasanya et al	Nigria	3	2007	5.04	0.13	N/A	17.4672	3080	7130	3	3	9	1.5	0.166667	6	0.839382
4	Onasanya et al	Nigria	3	2007	5.04	0.13	N/A	26.2009	3080	6040	3	3	9	1.5	0.166667	6	0.673474
5	Taye etal	Ethiopia	3	2008	5.04	16.4	N/A	10.0437	1797.8	2983.3	3	3	4	1.5	0.375	2.66667	0.506466
5	Taye etal	Ethiopia	3	2008	5.04	16.4	N/A	20.0873	1797.8	3817.2	3	3	4	1.5	0.375	2.66667	0.752953
5	Taye etal	Ethiopia	3	2008	5.04	16.4	N/A	30.131	1797.8	3324.4	3	3	4	1.5	0.375	2.66667	0.614726
5	Taye etal	Ethiopia	3	2008	5.04	16.4	N/A	40.1747	1797.8	3218.6	3	3	4	1.5	0.375	2.66667	0.582383
5	Taye etal	Ethiopia	3	2008	5.04	16.4	N/A	10.0437	1806	3069.2	3	3	4	1.5	0.375	2.66667	0.530302
5	Taye etal	Ethiopia	3	2008	5.04	16.4	N/A	20.0873	1806	3864.9	3	3	4	1.5	0.375	2.66667	0.760821
5	Taye etal	Ethiopia	3	2008	5.04	16.4	N/A	30.131	1806	4190	3	3	4	1.5	0.375	2.66667	0.841586
5	Taye etal	Ethiopia	3	2008	5.04	16.4	N/A	40.1747	1806	4963.1	3	3	4	1.5	0.375	2.66667	1.01092
5	Taye etal	Ethiopia	3	2008	5.04	16.4	N/A	10.0437	2078.3	3001.5	3	3	4	1.5	0.375	2.66667	0.367562
5	Taye etal	Ethiopia	3	2008	5.04	16.4	N/A	20.0873	2078.3	3948.8	3	3	4	1.5	0.375	2.66667	0.641861
5	Taye etal	Ethiopia	3	2008	5.04	16.4	N/A	30.131	2078.3	4181	3	3	4	1.5	0.375	2.66667	0.699
5	Taye etal	Ethiopia	3	2008	5.04	16.4	N/A	40.1747	2078.3	4664.5	3	3	4	1.5	0.375	2.66667	0.80843
5	Taye etal	Ethiopia	3	2008	5.04	16.4	N/A	10.0437	2373.3	3860.9	3	3	4	1.5	0.375	2.66667	0.486619
5	Taye etal	Ethiopia	3	2008	5.04	16.4	N/A	20.0873	2373.3	4177	3	3	4	1.5	0.375	2.66667	0.565312
5	Taye etal	Ethiopia	3	2008	5.04	16.4	N/A	30.131	2373.3	4408	3	3	4	1.5	0.375	2.66667	0.61914
5	Taye etal	Ethiopia	3	2008	5.04	16.4	N/A	40.1747	2373.3	5103	3	3	4	1.5	0.375	2.66667	0.765547
5	Taye etal	Ethiopia	3	2008	5.04	16.4	N/A	10.0437	3510.4	5977.5	3	3	4	1.5	0.375	2.66667	0.532272
5	Taye etal	Ethiopia	3	2008	5.04	16.4	N/A	20.0873	3510.4	4470.5	3	3	4	1.5	0.375	2.66667	0.24177
5	Taye etal	Ethiopia	3	2008	5.04	16.4	N/A	30.131	3510.4	5137.4	3	3	4	1.5	0.375	2.66667	0.380817
5	Taye etal	Ethiopia	3	2008	5.04	16.4	N/A	40.1747	3510.4	5497.5	3	3	4	1.5	0.375	2.66667	0.448563
8	Njoroge etal	Kenya	4	2015	5.59	10.05	1400mm	2.62009	1750	3100	4	4	4	2	0.5	2	0.571786
8	Njoroge etal	Kenya	4	2015	5.59	10.05	1400mm	2.62009	1750	3460	4	4	4	2	0.5	2	0.681653
8	Njoroge etal	Kenya	4	2015	5.59	10.05	1400mm	2.62009	1750	4040	4	4	4	2	0.5	2	0.836629
8	Njoroge etal	Kenya	4	2015	5.59	10.05	1400mm	2.62009	1750	3570	4	4	4	2	0.5	2	0.71295
8	Njoroge etal	Kenya	4	2015	5.59	10.05	1400mm	2.62009	1550	2490	4	4	4	2	0.5	2	0.474028
8	Njoroge etal	Kenya	4	2015	5.59	10.05	1400mm	2.62009	1550	3290	4	4	4	2	0.5	2	0.752633
8	Njoroge etal	Kenya	4	2015	5.59	10.05	1400mm	2.62009	1550	3080	4	4	4	2	0.5	2	0.686675
8	Njoroge etal	Kenya	4	2015	5.59	10.05	1400mm	2.62009	1550	3200	4	4	4	2	0.5	2	0.724896
9	Zingare et al	Zimbabwe	3	2004 and 2007	4.5	2	850mm	13.1004	2260	2320	3	3	2	1.5	0.75	1.33333	0.0262024
9	Zingare et al	Zimbabwe	3	2005 and 2007	4.5	2	850mm	13.1004	2260	2920	3	3	2	1.5	0.75	1.33333	0.256219
10	Arubalueze et al	Nigeria	3	2008	5.14	15.2	N/A	6.55022	2100	6690	3	3	8	1.5	0.1875	5.33333	1.15868
10	Arubalueze et al	Nigeria	3	2008	5.14	15.2	N/A	13.1004	2100	6820	3	3	8	1.5	0.1875	5.33333	1.17792
10	Arubalueze et al	Nigeria	3	2009	5.14	22	N/A	6.55022	2100	7300	3	3	8	1.5	0.1875	5.33333	1.24594
10	Arubalueze et al	Nigeria	3	2008	5.14	15.2	N/A	13.1004	2100	2096.5	3	3	8	1.5	0.1875	5.33333	-0.00166806
10	Arubalueze et al	Nigeria	3	2008	5.14	15.2	N/A	6.55022	2100	2266	3	3	8	1.5	0.1875	5.33333	0.0760788
10	Arubalueze et al	Nigeria	3	2009	5.14	22	N/A	13.1004	2100	2430	3	3	8	1.5	0.1875	5.33333	0.145954
10	Arubalueze et al	Nigeria	3	2008	5.14	15.2	N/A	6.55022	2100	3261.8	3	3	8	1.5	0.1875	5.33333	0.440342
10	Arubalueze et al	Nigeria	3	2008	5.14	15.2	N/A	13.1004	2100	3368.3	3	3	8	1.5	0.1875	5.33333	0.472471
11	Ivan Bernardo cuvaca	Lessotho	4	2012/2013	N/A	N/A	811mm	13.1004	9120	10020	4	4	4	2	0.5	2	0.0941133
11	Ivan Bernardo cuvaca	Lessotho	4	2012/2014	N/A	N/A	811mm	26.2009	9120	10150	4	4	4	2	0.5	2	0.107004
11	Ivan Bernardo cuvaca	Lessotho	4	2012/2015	N/A	N/A	811mm	34.9345	9120	10010	4	4	4	2	0.5	2	0.0931148
11	Ivan Bernardo cuvaca	Lessotho	4	2012/2016	N/A	N/A	811mm	52.4017	9120	9870	4	4	4	2	0.5	2	0.07903
11	Ivan Bernardo cuvaca	Lessotho	4	2012/2017	N/A	N/A	811mm	13.1004	5860	8740	4	4	4	2	0.5	2	0.399761
11	Ivan Bernardo cuvaca	Lessotho	4	2012/2018	N/A	N/A	811mm	26.2009	5860	6160	4	4	4	2	0.5	2	0.0499272
11	Ivan Bernardo cuvaca	Lessotho	4	2012/2019	N/A	N/A	811mm	34.9345	5860	7130	4	4	4	2	0.5	2	0.196162
11	Ivan Bernardo cuvaca	Lessotho	4	2012/2020	N/A	N/A	811mm	52.4017	5860	7940	4	4	4	2	0.5	2	0.303764
11	Ivan Bernardo cuvaca	Lessotho	4	2012/2021	N/A	N/A	811mm	13.1004	7390	8520	4	4	4	2	0.5	2	0.142289
11	Ivan Bernardo cuvaca	Lessotho	4	2012/2022	N/A	N/A	811mm	26.2009	7390	9350	4	4	4	2	0.5	2	0.235249
11	Ivan Bernardo cuvaca	Lessotho	4	2012/2023	N/A	N/A	811mm	34.9345	7390	9180	4	4	4	2	0.5	2	0.216899
11	Ivan Bernardo cuvaca	Lessotho	4	2012/2024	N/A	N/A	811mm	52.4017	7390	8030	4	4	4	2	0.5	2	0.0830568
11	Ivan Bernardo cuvaca	Lessotho	4	2012/2025	N/A	N/A	811mm	13.1004	8150	7350	4	4	4	2	0.5	2	-0.103318
11	Ivan Bernardo cuvaca	Lessotho	4	2012/2026	N/A	N/A	811mm	26.2009	8150	6070	4	4	4	2	0.5	2	-0.294659
11	Ivan Bernardo cuvaca	Lessotho	4	2012/2027	N/A	N/A	811mm	34.9345	8150	7710	4	4	4	2	0.5	2	-0.0554997
11	Ivan Bernardo cuvaca	Lessotho	4	2012/2028	N/A	N/A	811mm	52.4017	8150	9460	4	4	4	2	0.5	2	0.149054
11	Ivan Bernardo cuvaca	Lessotho	4	2012/2029	N/A	N/A	811mm	13.1004	3550	4330	4	4	4	2	0.5	2	0.19862
11	Ivan Bernardo cuvaca	Lessotho	4	2012/2030	N/A	N/A	811mm	26.2009	3550	4830	4	4	4	2	0.5	2	0.307899
11	Ivan Bernardo cuvaca	Lessotho	4	2012/2031	N/A	N/A	811mm	34.9345	3550	5670	4	4	4	2	0.5	2	0.468242
11	Ivan Bernardo cuvaca	Lessotho	4	2012/2032	N/A	N/A	811mm	52.4017	3550	6030	4	4	4	2	0.5	2	0.529799
11	Ivan Bernardo cuvaca	Lessotho	4	2012/2033	N/A	N/A	811mm	13.1004	3060	4410	4	4	4	2	0.5	2	0.36546
11	Ivan Bernardo cuvaca	Lessotho	4	2012/2034	N/A	N/A	811mm	26.2009	3060	5690	4	4	4	2	0.5	2	0.620295
11	Ivan Bernardo cuvaca	Lessotho	4	2012/2035	N/A	N/A	811mm	34.9345	3060	4010	4	4	4	2	0.5	2	0.270376
11	Ivan Bernardo cuvaca	Lessotho	4	2012/2036	N/A	N/A	811mm	52.4017	3060	5370	4	4	4	2	0.5	2	0.562413
11	Ivan Bernardo cuvaca	Lessotho	4	2012/2037	N/A	N/A	811mm	13.1004	2700	3580	4	4	4	2	0.5	2	0.282111
11	Ivan Bernardo cuvaca	Lessotho	4	2012/2038	N/A	N/A	811mm	26.2009	2700	4080	4	4	4	2	0.5	2	0.412845
11	Ivan Bernardo cuvaca	Lessotho	4	2012/2039	N/A	N/A	811mm	34.9345	2700	4480	4	4	4	2	0.5	2	0.506371
11	Ivan Bernardo cuvaca	Lessotho	4	2012/2040	N/A	N/A	811mm	52.4017	2700	3460	4	4	4	2	0.5	2	0.248017
11	Ivan Bernardo cuvaca	Lessotho	4	2012/2041	N/A	N/A	811mm	13.1004	4340	7570	4	4	4	2	0.5	2	0.556319
11	Ivan Bernardo cuvaca	Lessotho	4	2012/2042	N/A	N/A	811mm	26.2009	4340	7440	4	4	4	2	0.5	2	0.538997
11	Ivan Bernardo cuvaca	Lessotho	4	2012/2043	N/A	N/A	811mm	34.9345	4340	8220	4	4	4	2	0.5	2	0.638696
11	Ivan Bernardo cuvaca	Lessotho	4	2012/2035	N/A	N/A	811mm	52.4017	4340	7850	4	4	3	2	0.666667	1.5	0.592639
12	Omar	Egypt	4	2010	8.02	0.0084	N/A	17.4672	6602	8032	4	4	3	2	0.666667	1.5	0.196061
12	Omar	Egypt	4	2010	8.02	0.0084	N/A	26.2009	6602	8443	4	4	3	2	0.666667	1.5	0.245965
12	Omar	Egypt	4	2010	8.02	0.0084	N/A	34.9345	6602	8548	4	4	3	2	0.666667	1.5	0.258325
12	Omar	Egypt	4	2010	8.02	0.0084	N/A	17.4672	7248	8532	4	4	3	2	0.666667	1.5	0.163098
12	Omar	Egypt	4	2010	8.02	0.0084	N/A	26.2009	7248	9198	4	4	3	2	0.666667	1.5	0.238261
12	Omar	Egypt	4	2010	8.02	0.0084	N/A	34.9345	7248	9408	4	4	3	2	0.666667	1.5	0.260835
13	Smaling et al.	Kenya	3	1987	5.2	2.3	1491	4.80349	2300	3800	3	3	3	1.5	0.5	2	0.502092
13	Smaling et al.	Kenya	3	1987	5.2	2.3	1491	9.60699	2300	4200	3	3	3	1.5	0.5	2	0.602175
13	Smaling et al.	Kenya	3	1987	5.2	2.3	1491	14.4105	2300	4700	3	3	3	1.5	0.5	2	0.714653
13	Smaling et al.	Kenya	3	1988	5.2	2.3	1491	4.80349	1200	1600	3	3	3	1.5	0.5	2	0.287682
13	Smaling et al.	Kenya	3	1988	5.2	2.3	1491	9.60699	1200	2900	3	3	3	1.5	0.5	2	0.882389
13	Smaling et al.	Kenya	3	1988	5.2	2.3	1491	14.4105	1200	2800	3	3	3	1.5	0.5	2	0.847298
13	Smaling et al.	Kenya	3	1989	5.2	2.3	1491	4.80349	3800	5300	3	3	3	1.5	0.5	2	0.332706
13	Smaling et al.	Kenya	3	1989	5.2	2.3	1491	9.60699	3800	5600	3	3	3	1.5	0.5	2	0.387766
13	Smaling et al.	Kenya	3	1989	5.2	2.3	1491	14.4105	3800	6600	3	3	3	1.5	0.5	2	0.552069
13	Smaling et al.	Kenya	3	1990	5.2	2.3	1491	4.80349	2100	5200	3	3	3	1.5	0.5	2	0.906721
13	Smaling et al.	Kenya	3	1990	5.2	2.3	1491	9.60699	2100	4300	3	3	3	1.5	0.5	2	0.716678
13	Smaling et al.	Kenya	3	1990	5.2	2.3	1491	14.4105	2100	4900	3	3	3	1.5	0.5	2	0.847298
13	Smaling et al.	Kenya	3	1987	7.9	9.7	1222	4.80349	3200	3900	3	3	3	1.5	0.5	2	0.197826
13	Smaling et al.	Kenya	3	1987	7.9	9.7	1222	9.60699	3200	6300	3	3	3	1.5	0.5	2	0.677399
13	Smaling et al.	Kenya	3	1987	7.9	9.7	1222	14.4105	3200	5900	3	3	3	1.5	0.5	2	0.611802
13	Smaling et al.	Kenya	3	1988	7.9	9.7	1222	4.80349	3000	6000	3	3	3	1.5	0.5	2	0.693147
13	Smaling et al.	Kenya	3	1988	7.9	9.7	1222	9.60699	3000	5400	3	3	3	1.5	0.5	2	0.587787
13	Smaling et al.	Kenya	3	1988	7.9	9.7	1222	14.4105	3000	4800	3	3	3	1.5	0.5	2	0.470004
13	Smaling et al.	Kenya	3	1989	7.9	9.7	1222	4.80349	3600	5900	3	3	3	1.5	0.5	2	0.494019
13	Smaling et al.	Kenya	3	1989	7.9	9.7	1222	9.60699	3600	6900	3	3	3	1.5	0.5	2	0.650588
13	Smaling et al.	Kenya	3	1989	7.9	9.7	1222	14.4105	3600	6500	3	3	3	1.5	0.5	2	0.590868
13	Smaling et al.	Kenya	3	1990	7.9	9.7	1222	4.80349	4600	4800	3	3	3	1.5	0.5	2	0.0425596
13	Smaling et al.	Kenya	3	1990	7.9	9.7	1222	9.60699	4600	7100	3	3	3	1.5	0.5	2	0.434038
13	Smaling et al.	Kenya	3	1990	7.9	9.7	1222	14.4105	4600	6400	3	3	3	1.5	0.5	2	0.330242
13	Smaling et al.	Kenya	3	1987	6	0.5	1301	4.80349	1600	2800	3	3	3	1.5	0.5	2	0.559616
13	Smaling et al.	Kenya	3	1987	6	0.5	1301	9.60699	1600	3100	3	3	3	1.5	0.5	2	0.661398
13	Smaling et al.	Kenya	3	1987	6	0.5	1301	14.4105	1600	3300	3	3	3	1.5	0.5	2	0.723919
13	Smaling et al.	Kenya	3	1988	6	0.5	1301	4.80349	2100	3800	3	3	3	1.5	0.5	2	0.593064
13	Smaling et al.	Kenya	3	1988	6	0.5	1301	9.60699	2100	3100	3	3	3	1.5	0.5	2	0.389465
13	Smaling et al.	Kenya	3	1988	6	0.5	1301	14.4105	2100	3300	3	3	3	1.5	0.5	2	0.451985
13	Smaling et al.	Kenya	3	1989	6	0.5	1301	4.80349	1300	2800	3	3	3	1.5	0.5	2	0.767255
13	Smaling et al.	Kenya	3	1989	6	0.5	1301	9.60699	1300	2500	3	3	3	1.5	0.5	2	0.653926
13	Smaling et al.	Kenya	3	1989	6	0.5	1301	14.4105	1300	2600	3	3	3	1.5	0.5	2	0.693147
13	Smaling et al.	Kenya	3	1990	6	0.5	1301	4.80349	1300	2200	3	3	3	1.5	0.5	2	0.526093
13	Smaling et al.	Kenya	3	1990	6	0.5	1301	9.60699	1300	2900	3	3	3	1.5	0.5	2	0.802346
13	Smaling et al.	Kenya	3	1990	6	0.5	1301	14.4105	1300	4200	3	3	3	1.5	0.5	2	1.17272
14	Besufikad Enideg	Ethiopia	3	2017	6.1	N/A	1500	6.55022	2216	2556	3	3	4	1.5	0.375	2.66667	0.14274
14	Besufikad Enideg	Ethiopia	3	2017	6.1	N/A	1500	13.1004	2216	2670	3	3	4	1.5	0.375	2.66667	0.186375
14	Besufikad Enideg	Ethiopia	3	2017	6.1	N/A	1500	19.6507	2216	2760	3	3	4	1.5	0.375	2.66667	0.219527
14	Besufikad Enideg	Ethiopia	3	2017	6.1	N/A	1500	26.2009	2216	2816	3	3	4	1.5	0.375	2.66667	0.239614
14	Besufikad Enideg	Ethiopia	3	2017	6.1	N/A	1500	6.55022	2683	3346	3	3	4	1.5	0.375	2.66667	0.22083
14	Besufikad Enideg	Ethiopia	3	2017	6.1	N/A	1500	13.1004	2683	3653	3	3	4	1.5	0.375	2.66667	0.308613
14	Besufikad Enideg	Ethiopia	3	2017	6.1	N/A	1500	19.6507	2683	3673	3	3	4	1.5	0.375	2.66667	0.314073
14	Besufikad Enideg	Ethiopia	3	2017	6.1	N/A	1500	26.2009	2683	2893	3	3	4	1.5	0.375	2.66667	0.0753585
14	Besufikad Enideg	Ethiopia	3	2017	6.1	N/A	1500	6.55022	2930	3750	3	3	4	1.5	0.375	2.66667	0.246753
14	Besufikad Enideg	Ethiopia	3	2017	6.1	N/A	1500	13.1004	2930	3113	3	3	4	1.5	0.375	2.66667	0.0605845
14	Besufikad Enideg	Ethiopia	3	2017	6.1	N/A	1500	19.6507	2930	3153	3	3	4	1.5	0.375	2.66667	0.073352
14	Besufikad Enideg	Ethiopia	3	2017	6.1	N/A	1500	26.2009	2930	3390	3	3	4	1.5	0.375	2.66667	0.145827
14	Besufikad Enideg	Ethiopia	3	2017	6.1	N/A	1500	6.55022	3043	3106	3	3	4	1.5	0.375	2.66667	0.0204919
14	Besufikad Enideg	Ethiopia	3	2017	6.1	N/A	1500	13.1004	3043	3923	3	3	4	1.5	0.375	2.66667	0.254013
14	Besufikad Enideg	Ethiopia	3	2017	6.1	N/A	1500	19.6507	3043	4306	3	3	4	1.5	0.375	2.66667	0.347166
14	Besufikad Enideg	Ethiopia	3	2017	6.1	N/A	1500	26.2009	3043	4273	3	3	4	1.5	0.375	2.66667	0.339472
14	Besufikad Enideg	Ethiopia	3	2017	6.1	N/A	1500	6.55022	3073	3310	3	3	4	1.5	0.375	2.66667	0.0742939
14	Besufikad Enideg	Ethiopia	3	2017	6.1	N/A	1500	13.1004	3073	4323	3	3	4	1.5	0.375	2.66667	0.341295
14	Besufikad Enideg	Ethiopia	3	2017	6.1	N/A	1500	19.6507	3073	5060	3	3	4	1.5	0.375	2.66667	0.498712
15	Maccarthy et al.	Ghana	3	2008	N/A	N/A	1400	13.1004	1181	2240	3	3	8	1.5	0.1875	5.33333	0.640114
15	Maccarthy et al.	Ghana	3	2008	N/A	N/A	1400	26.2009	1181	2337	3	3	8	1.5	0.1875	5.33333	0.682507
15	Maccarthy et al.	Ghana	3	2008	N/A	N/A	1400	13.1004	1181	2963	3	3	8	1.5	0.1875	5.33333	0.919841
15	Maccarthy et al.	Ghana	3	2008	N/A	N/A	1400	26.2009	1181	3283	3	3	8	1.5	0.1875	5.33333	1.0224
15	Maccarthy et al.	Ghana	3	2008	N/A	N/A	1400	13.1004	1181	3965	3	3	8	1.5	0.1875	5.33333	1.21114
15	Maccarthy et al.	Ghana	3	2008	N/A	N/A	1400	26.2009	1181	4157	3	3	8	1.5	0.1875	5.33333	1.25843
15	Maccarthy et al.	Ghana	3	2008	N/A	N/A	1400	13.1004	1181	4267	3	3	8	1.5	0.1875	5.33333	1.28455
15	Maccarthy et al.	Ghana	3	2008	N/A	N/A	1400	26.2009	1181	4187	3	3	8	1.5	0.1875	5.33333	1.26562
15	Maccarthy et al.	Ghana	3	2008	N/A	N/A	1400	13.1004	1072	2228	3	3	8	1.5	0.1875	5.33333	0.731578
15	Maccarthy et al.	Ghana	3	2008	N/A	N/A	1400	26.2009	1072	2214	3	3	8	1.5	0.1875	5.33333	0.725275
15	Maccarthy et al.	Ghana	3	2008	N/A	N/A	1400	13.1004	1072	2585	3	3	8	1.5	0.1875	5.33333	0.880199
15	Maccarthy et al.	Ghana	3	2008	N/A	N/A	1400	26.2009	1072	2812	3	3	8	1.5	0.1875	5.33333	0.96437
15	Maccarthy et al.	Ghana	3	2008	N/A	N/A	1400	13.1004	1072	3440	3	3	8	1.5	0.1875	5.33333	1.16595
15	Maccarthy et al.	Ghana	3	2008	N/A	N/A	1400	26.2009	1072	3657	3	3	8	1.5	0.1875	5.33333	1.22712
15	Maccarthy et al.	Ghana	3	2008	N/A	N/A	1400	13.1004	1072	3825	3	3	8	1.5	0.1875	5.33333	1.27203
15	Maccarthy et al.	Ghana	3	2008	N/A	N/A	1400	26.2009	1072	3906	3	3	8	1.5	0.1875	5.33333	1.29299
15	Maccarthy et al.	Ghana	3	2008	N/A	N/A	1400	13.1004	1222	2263	3	3	8	1.5	0.1875	5.33333	0.616203
15	Maccarthy et al.	Ghana	3	2008	N/A	N/A	1400	26.2009	1222	2255	3	3	8	1.5	0.1875	5.33333	0.612661
15	Maccarthy et al.	Ghana	3	2008	N/A	N/A	1400	13.1004	1222	2971	3	3	8	1.5	0.1875	5.33333	0.88841
15	Maccarthy et al.	Ghana	3	2008	N/A	N/A	1400	26.2009	1222	3076	3	3	8	1.5	0.1875	5.33333	0.923141
15	Maccarthy et al.	Ghana	3	2008	N/A	N/A	1400	13.1004	1222	3717	3	3	8	1.5	0.1875	5.33333	1.11243
15	Maccarthy et al.	Ghana	3	2008	N/A	N/A	1400	26.2009	1222	4007	3	3	8	1.5	0.1875	5.33333	1.18755
15	Maccarthy et al.	Ghana	3	2008	N/A	N/A	1400	13.1004	1222	4176	3	3	8	1.5	0.1875	5.33333	1.22886
15	Maccarthy et al.	Ghana	3	2008	N/A	N/A	1400	26.2009	1222	4019	3	3	8	1.5	0.1875	5.33333	1.19054
15	Maccarthy et al.	Ghana	3	2008	N/A	N/A	1400	13.1004	824	2026	3	3	8	1.5	0.1875	5.33333	0.899648
15	Maccarthy et al.	Ghana	3	2008	N/A	N/A	1400	26.2009	824	1220	3	3	8	1.5	0.1875	5.33333	0.392436
15	Maccarthy et al.	Ghana	3	2008	N/A	N/A	1400	13.1004	824	2617	3	3	8	1.5	0.1875	5.33333	1.15561
15	Maccarthy et al.	Ghana	3	2008	N/A	N/A	1400	13.1004	824	2700	3	3	8	1.5	0.1875	5.33333	1.18684
15	Maccarthy et al.	Ghana	3	2008	N/A	N/A	1400	26.2009	824	2968	3	3	8	1.5	0.1875	5.33333	1.28147
15	Maccarthy et al.	Ghana	3	2008	N/A	N/A	1400	13.1004	1623	6624	3	3	8	1.5	0.1875	5.33333	1.40642
15	Maccarthy et al.	Ghana	3	2008	N/A	N/A	1400	26.2009	1623	4699	3	3	8	1.5	0.1875	5.33333	1.06307
15	Maccarthy et al.	Ghana	3	2008	N/A	N/A	1400	13.1004	1623	3625	3	3	8	1.5	0.1875	5.33333	0.803578
15	Maccarthy et al.	Ghana	3	2008	N/A	N/A	1400	26.2009	1623	3813	3	3	8	1.5	0.1875	5.33333	0.85414
15	Maccarthy et al.	Ghana	3	2008	N/A	N/A	1400	13.1004	1623	4805	3	3	8	1.5	0.1875	5.33333	1.08538
15	Maccarthy et al.	Ghana	3	2008	N/A	N/A	1400	26.2009	1623	4903	3	3	8	1.5	0.1875	5.33333	1.10557
15	Maccarthy et al.	Ghana	3	2008	N/A	N/A	1400	13.1004	1623	4953	3	3	8	1.5	0.1875	5.33333	1.11572
15	Maccarthy et al.	Ghana	3	2008	N/A	N/A	1400	26.2009	1623	4913	3	3	8	1.5	0.1875	5.33333	1.10761
15	Maccarthy et al.	Ghana	3	2008	N/A	N/A	1400	13.1004	1258	2530	3	3	8	1.5	0.1875	5.33333	0.698696
15	Maccarthy et al.	Ghana	3	2008	N/A	N/A	1400	26.2009	1258	2379	3	3	8	1.5	0.1875	5.33333	0.637157
15	Maccarthy et al.	Ghana	3	2008	N/A	N/A	1400	13.1004	1258	3010	3	3	8	1.5	0.1875	5.33333	0.872417
15	Maccarthy et al.	Ghana	3	2008	N/A	N/A	1400	26.2009	1258	3020	3	3	8	1.5	0.1875	5.33333	0.875734
15	Maccarthy et al.	Ghana	3	2008	N/A	N/A	1400	13.1004	1258	4263	3	3	8	1.5	0.1875	5.33333	1.22045
15	Maccarthy et al.	Ghana	3	2008	N/A	N/A	1400	26.2009	1258	4482	3	3	8	1.5	0.1875	5.33333	1.27055
15	Maccarthy et al.	Ghana	3	2008	N/A	N/A	1400	13.1004	1258	4597	3	3	8	1.5	0.1875	5.33333	1.29588
15	Maccarthy et al.	Ghana	3	2008	N/A	N/A	1400	26.2009	1258	4503	3	3	8	1.5	0.1875	5.33333	1.27522
15	Maccarthy et al.	Ghana	3	2008	N/A	N/A	1400	13.1004	1258	5277	3	3	8	1.5	0.1875	5.33333	1.43383
15	Maccarthy et al.	Ghana	3	2008	N/A	N/A	1400	26.2009	1258	2355	3	3	8	1.5	0.1875	5.33333	0.627018
15	Maccarthy et al.	Ghana	3	2008	N/A	N/A	1400	13.1004	1258	3206	3	3	8	1.5	0.1875	5.33333	0.935501
15	Maccarthy et al.	Ghana	3	2008	N/A	N/A	1400	26.2009	1258	3560	3	3	8	1.5	0.1875	5.33333	1.04024
15	Maccarthy et al.	Ghana	3	2008	N/A	N/A	1400	13.1004	1258	4199	3	3	8	1.5	0.1875	5.33333	1.20532
15	Maccarthy et al.	Ghana	3	2008	N/A	N/A	1400	26.2009	1258	4509	3	3	8	1.5	0.1875	5.33333	1.27655
15	Maccarthy et al.	Ghana	3	2008	N/A	N/A	1400	13.1004	1258	4462	3	3	8	1.5	0.1875	5.33333	1.26607
15	Maccarthy et al.	Ghana	3	2008	N/A	N/A	1400	26.2009	1258	4557	3	3	8	1.5	0.1875	5.33333	1.28714
15	Maccarthy et al.	Ghana	3	2008	N/A	N/A	1400	13.1004	918	2125	3	3	5	1.5	0.3	3.33333	0.83933
15	Maccarthy et al.	Ghana	3	2008	N/A	N/A	1400	26.2009	918	2222	3	3	5	1.5	0.3	3.33333	0.883966
15	Maccarthy et al.	Ghana	3	2008	N/A	N/A	1400	13.1004	918	2672	3	3	5	1.5	0.3	3.33333	1.06839
15	Maccarthy et al.	Ghana	3	2008	N/A	N/A	1400	13.1004	918	2881	3	3	5	1.5	0.3	3.33333	1.1437
15	Maccarthy et al.	Ghana	3	2008	N/A	N/A	1400	26.2009	918	2985	3	3	5	1.5	0.3	3.33333	1.17916
16	Koala et al	Kenya	3	2007	5.6	1.19	1700	13.1004	1740	2452	3	3	6	1.5	0.25	4	0.343019
16	Koala et al	Kenya	3	2007	5.6	1.19	1700	10.917	1740	2420	3	3	6	1.5	0.25	4	0.329882
16	Koala et al	Kenya	3	2007	5.6	1.19	1700	27.1616	1740	3550	3	3	6	1.5	0.25	4	0.713062
16	Koala et al	Kenya	3	2007	5.6	1.19	1700	21.8341	1740	3600	3	3	6	1.5	0.25	4	0.727049
16	Koala et al	Kenya	3	2007	5.6	1.19	1700	21.8341	1740	3020	3	3	6	1.5	0.25	4	0.551372
16	Koala et al	Kenya	3	2007	5.6	1.19	1700	21.8341	1740	2940	3	3	6	1.5	0.25	4	0.524524
16	Koala et al	Kenya	3	2007	5.6	1.19	1700	5.45852	2000	3820	3	3	6	1.5	0.25	4	0.647103
16	Koala et al	Kenya	3	2007	5.6	1.19	1700	10.917	2000	4160	3	3	6	1.5	0.25	4	0.732368
16	Koala et al	Kenya	3	2007	5.6	1.19	1700	27.1616	2000	4730	3	3	6	1.5	0.25	4	0.860778
16	Koala et al	Kenya	3	2007	5.6	1.19	1700	21.8341	2000	5000	3	3	6	1.5	0.25	4	0.916291
16	Koala et al	Kenya	3	2007	5.6	1.19	1700	21.8341	2000	4270	3	3	6	1.5	0.25	4	0.758467
16	Koala et al	Kenya	3	2007	5.6	1.19	1700	21.8341	2000	4810	3	3	6	1.5	0.25	4	0.87755
16	Koala et al	Kenya	3	2007	5.6	1.19	1700	5.45852	2210	3885	3	3	6	1.5	0.25	4	0.56413
16	Koala et al	Kenya	3	2007	5.6	1.19	1700	10.917	2210	4280	3	3	6	1.5	0.25	4	0.66096
16	Koala et al	Kenya	3	2007	5.6	1.19	1700	27.1616	2210	5460	3	3	6	1.5	0.25	4	0.904456
16	Koala et al	Kenya	3	2007	5.6	1.19	1700	21.8341	2210	5940	3	3	6	1.5	0.25	4	0.988717
16	Koala et al	Kenya	3	2007	5.6	1.19	1700	21.8341	2210	5670	3	3	6	1.5	0.25	4	0.942197
16	Koala et al	Kenya	3	2007	5.6	1.19	1700	21.8341	2210	5210	3	3	6	1.5	0.25	4	0.857587
16	Koala et al	Kenya	3	2007	5.6	1.19	1700	5.45852	2220	4270	3	3	6	1.5	0.25	4	0.654107
16	Koala et al	Kenya	3	2007	5.6	1.19	1700	10.917	2220	5090	3	3	6	1.5	0.25	4	0.829771
16	Koala et al	Kenya	3	2007	5.6	1.19	1700	27.1616	2220	5930	3	3	6	1.5	0.25	4	0.982517
16	Koala et al	Kenya	3	2007	5.6	1.19	1700	21.8341	2220	6070	3	3	6	1.5	0.25	4	1.00585
16	Koala et al	Kenya	3	2007	5.6	1.19	1700	21.8341	2220	6270	3	3	6	1.5	0.25	4	1.03827
16	Koala et al	Kenya	3	2007	5.6	1.19	1700	21.8341	2220	5540	3	3	6	1.5	0.25	4	0.914487
16	Koala et al	Kenya	3	2007	5.6	1.19	1700	5.45852	2520	5020	3	3	6	1.5	0.25	4	0.689171
16	Koala et al	Kenya	3	2007	5.6	1.19	1700	10.917	2520	6120	3	3	6	1.5	0.25	4	0.887303
16	Koala et al	Kenya	3	2007	5.6	1.19	1700	27.1616	2520	7330	3	3	6	1.5	0.25	4	1.06772
16	Koala et al	Kenya	3	2007	5.6	1.19	1700	21.8341	2520	6500	3	3	6	1.5	0.25	4	0.947543
16	Koala et al	Kenya	3	2007	5.6	1.19	1700	21.8341	2520	6490	3	3	6	1.5	0.25	4	0.946004
16	Koala et al	Kenya	3	2007	5.6	1.19	1700	21.8341	2520	6880	3	3	6	1.5	0.25	4	1.00436
16	Koala et al	Kenya	3	2007	5.6	1.19	1700	5.45852	1830	3210	3	3	6	1.5	0.25	4	0.561955
16	Koala et al	Kenya	3	2007	5.6	1.19	1700	10.917	1830	3320	3	3	6	1.5	0.25	4	0.595649
16	Koala et al	Kenya	3	2007	5.6	1.19	1700	27.1616	1830	3290	3	3	6	1.5	0.25	4	0.586572
16	Koala et al	Kenya	3	2007	5.6	1.19	1700	21.8341	1830	3450	3	3	6	1.5	0.25	4	0.634058
16	Koala et al	Kenya	3	2007	5.6	1.19	1700	21.8341	1830	3790	3	3	6	1.5	0.25	4	0.72805
16	Koala et al	Kenya	3	2007	5.6	1.19	1700	21.8341	1830	3800	3	3	6	1.5	0.25	4	0.730685
16	Koala et al	Kenya	3	2007	5.6	1.19	1700	5.45852	980	2442	3	3	6	1.5	0.25	4	0.91302
16	Koala et al	Kenya	3	2007	5.6	1.19	1700	10.917	980	2665	3	3	6	1.5	0.25	4	1.00041
16	Koala et al	Kenya	3	2007	5.6	1.19	1700	27.1616	980	2605	3	3	6	1.5	0.25	4	0.977635
16	Koala et al	Kenya	3	2007	5.6	1.19	1700	21.8341	980	2945	3	3	6	1.5	0.25	4	1.10031
16	Koala et al	Kenya	3	2007	5.6	1.19	1700	21.8341	980	2037.5	3	3	6	1.5	0.25	4	0.731926
16	Koala et al	Kenya	3	2007	5.6	1.19	1700	21.8341	980	2862.5	3	3	6	1.5	0.25	4	1.0719
16	Koala et al	Kenya	3	2007	5.6	1.19	1700	5.45852	1600	4220	3	3	6	1.5	0.25	4	0.969831
16	Koala et al	Kenya	3	2007	5.6	1.19	1700	10.917	1600	5560	3	3	6	1.5	0.25	4	1.24559
16	Koala et al	Kenya	3	2007	5.6	1.19	1700	27.1616	1600	6080	3	3	6	1.5	0.25	4	1.335
16	Koala et al	Kenya	3	2007	5.6	1.19	1700	21.8341	1600	6110	3	3	6	1.5	0.25	4	1.33992
16	Koala et al	Kenya	3	2007	5.6	1.19	1700	21.8341	1600	6110	3	3	6	1.5	0.25	4	1.33992
16	Koala et al	Kenya	3	2007	5.6	1.19	1700	21.8341	1600	6540	3	3	6	1.5	0.25	4	1.40793
16	Koala et al	Kenya	3	2007	5.6	1.19	1700	5.45852	1970	3520	3	3	6	1.5	0.25	4	0.580427
16	Koala et al	Kenya	3	2007	5.6	1.19	1700	10.917	1970	4770	3	3	6	1.5	0.25	4	0.884313
16	Koala et al	Kenya	3	2007	5.6	1.19	1700	27.1616	1970	4840	3	3	6	1.5	0.25	4	0.898881
16	Koala et al	Kenya	3	2007	5.6	1.19	1700	21.8341	1970	4670	3	3	6	1.5	0.25	4	0.863126
16	Koala et al	Kenya	3	2007	5.6	1.19	1700	21.8341	1970	5210	3	3	6	1.5	0.25	4	0.972546
16	Koala et al	Kenya	3	2007	5.6	1.19	1700	21.8341	1970	4820	3	3	6	1.5	0.25	4	0.89474
16	Koala et al	Kenya	3	2007	5.6	1.19	1700	5.45852	2250	4730	3	3	6	1.5	0.25	4	0.742995
16	Koala et al	Kenya	3	2007	5.6	1.19	1700	10.917	2250	4730	3	3	6	1.5	0.25	4	0.742995
16	Koala et al	Kenya	3	2007	5.6	1.19	1700	27.1616	2250	5850	3	3	6	1.5	0.25	4	0.955511
16	Koala et al	Kenya	3	2007	5.6	1.19	1700	21.8341	2250	5620	3	3	6	1.5	0.25	4	0.915401
16	Koala et al	Kenya	3	2007	5.6	1.19	1700	21.8341	2250	5940	3	3	6	1.5	0.25	4	0.970779
16	Koala et al	Kenya	3	2007	5.6	1.19	1700	21.8341	2250	6120	3	3	6	1.5	0.25	4	1.00063
17	Osiname et al.	Cameroon	4	1991	5	3.6	N/A	9.60699	2176	3521	4	4	4	2	0.5	2	0.481257
17	Osiname et al.	Cameroon	4	1991	5	3.6	N/A	19.214	2176	3629	4	4	4	2	0.5	2	0.511469
17	Osiname et al.	Cameroon	4	1991	5	3.6	N/A	38.4279	2176	3065	4	4	4	2	0.5	2	0.342559
17	Osiname et al.	Cameroon	4	1991	5	3.6	N/A	39.3013	2176	2837	4	4	4	2	0.5	2	0.265259
17	Osiname et al.	Cameroon	4	1992	5	3.6	N/A	38.4279	1263	4772	4	4	4	2	0.5	2	1.32928
17	Osiname et al.	Cameroon	4	1992	5	3.6	N/A	57.6419	1263	3708	4	4	4	2	0.5	2	1.077
17	Osiname et al.	Cameroon	4	1993	5	3.6	N/A	9.60699	1845	3755	4	4	4	2	0.5	2	0.710609
17	Osiname et al.	Cameroon	4	1993	5	3.6	N/A	19.214	1845	3214	4	4	4	2	0.5	2	0.555037
17	Osiname et al.	Cameroon	4	1993	5	3.6	N/A	38.4279	1845	3325	4	4	4	2	0.5	2	0.58899
17	Osiname et al.	Cameroon	4	1993	5	3.6	N/A	57.6419	1845	3551	4	4	4	2	0.5	2	0.65475
17	Osiname et al.	Cameroon	4	1991	5	3	N/A	9.60699	5574	7061	4	4	4	2	0.5	2	0.236474
17	Osiname et al.	Cameroon	4	1991	5.7	3	N/A	19.214	5574	6155	4	4	4	2	0.5	2	0.0991518
17	Osiname et al.	Cameroon	4	1991	5.7	3	N/A	38.4279	5574	7666	4	4	4	2	0.5	2	0.318682
17	Osiname et al.	Cameroon	4	1991	5.7	3	N/A	57.6419	5574	5852	4	4	4	2	0.5	2	0.0486706
17	Osiname et al.	Cameroon	4	1992	5.7	3	N/A	9.60699	4664	7558	4	4	4	2	0.5	2	0.482733
17	Osiname et al.	Cameroon	4	1993	5.7	3	N/A	19.214	5917	7073	4	4	4	2	0.5	2	0.178455
17	Osiname et al.	Cameroon	4	1993	5.7	3	N/A	38.4279	5917	7745	4	4	4	2	0.5	2	0.269218
17	Osiname et al.	Cameroon	4	1993	5.7	3	N/A	57.6419	5917	6548	4	4	4	2	0.5	2	0.10133
18	Sellase	Ethiopia	4	2014	5.13	5.23	N/A	13.1004	4275.42	4918.37	4	4	4	2	0.5	2	0.140095
18	Sellase	Ethiopia	4	2014	5.13	5.23	N/A	26.2009	4275.42	5167.86	4	4	4	2	0.5	2	0.189576
18	Sellase	Ethiopia	4	2014	5.13	5.23	N/A	39.3013	4275.42	5346.73	4	4	4	2	0.5	2	0.223603
18	Sellase	Ethiopia	4	2014	5.13	5.23	N/A	65.5022	4275.42	5240.23	4	4	4	2	0.5	2	0.203483
19	Opala et al.	Kenya	3	2006	4.8	5.4	1700	26.2009	1900	2600	3	3	3	1.5	0.5	2	0.313658
19	Opala et al.	Kenya	3	2006	4.8	5.4	1700	26.2009	1900	4000	3	3	3	1.5	0.5	2	0.74444
19	Opala et al.	Kenya	3	2006	4.8	5.4	1700	26.2009	1900	4000	3	3	3	1.5	0.5	2	0.74444
19	Opala et al.	Kenya	3	2006	4.8	5.4	1700	26.2009	1800	3100	3	3	3	1.5	0.5	2	0.543615
19	Opala et al.	Kenya	3	2006	4.8	5.4	1700	26.2009	1800	2700	3	3	3	1.5	0.5	2	0.405465
19	Opala et al.	Kenya	3	2006	4.8	5.4	1700	26.2009	1800	3000	3	3	3	1.5	0.5	2	0.510826
19	Opala et al.	Kenya	3	2006	4.8	5.4	1700	26.2009	1300	2400	3	3	3	1.5	0.5	2	0.613104
19	Opala et al.	Kenya	3	2006	4.8	5.4	1700	26.2009	1300	2400	3	3	3	1.5	0.5	2	0.613104
19	Opala et al.	Kenya	3	2006	4.8	5.4	1700	26.2009	1300	3500	3	3	3	1.5	0.5	2	0.990399
20	Opala et al.	Kenya	3	2007	5.1	5.6	1700	26.2009	2600	3400	3	3	3	1.5	0.5	2	0.268264
20	Opala et al.	Kenya	3	2007	5.1	5.6	1700	26.2009	2600	2400	3	3	3	1.5	0.5	2	-0.0800427
20	Opala et al.	Kenya	3	2007	5.1	5.6	1700	26.2009	2600	3900	3	3	3	1.5	0.5	2	0.405465
20	Opala et al.	Kenya	3	2007	5.1	2.5	1900	26.2009	1900	2600	3	3	3	1.5	0.5	2	0.313658
20	Opala et al.	Kenya	3	2007	5.1	2.5	1900	26.2009	1900	3000	3	3	3	1.5	0.5	2	0.456758
20	Opala et al.	Kenya	3	2007	5.1	2.5	1900	26.2009	1900	2200	3	3	3	1.5	0.5	2	0.146603
21	SHILULI et al.	Kenya	3	1996	N/A	N/A	1200-1600	17.4672	1600	2200	3	3	3	1.5	0.5	2	0.318454
21	SHILULI et al.	Kenya	3	1996	N/A	N/A	1200-1600	26.2009	1600	2400	3	3	8	1.5	0.1875	5.33333	0.405465
21	SHILULI et al.	Kenya	3	1996	N/A	N/A	1200-1600	17.4672	1600	2300	3	3	8	1.5	0.1875	5.33333	0.362905
21	SHILULI et al.	Kenya	3	1996	N/A	N/A	1200-1600	26.2009	1600	3100	3	3	8	1.5	0.1875	5.33333	0.661398
21	SHILULI et al.	Kenya	3	1996	N/A	N/A	1200-1600	17.4672	1600	3600	3	3	8	1.5	0.1875	5.33333	0.81093
21	SHILULI et al.	Kenya	3	1996	N/A	N/A	1200-1600	26.2009	1600	2900	3	3	8	1.5	0.1875	5.33333	0.594707
21	SHILULI et al.	Kenya	3	1996	N/A	N/A	1200-1600	17.4672	1600	3200	3	3	8	1.5	0.1875	5.33333	0.693147
21	SHILULI et al.	Kenya	3	1996	N/A	N/A	1200-1600	26.2009	1600	4100	3	3	8	1.5	0.1875	5.33333	0.940983
23	Wasonga et al.	Kenya	3	2006	5.1	3.8	459	5.67686	1345	2812	3	3	4	1.5	0.375	2.66667	0.737502
23	Wasonga et al.	Kenya	3	2006	5.1	3.8	459	11.3537	1345	3921	3	3	4	1.5	0.375	2.66667	1.06995
23	Wasonga et al.	Kenya	3	2006	5.1	3.8	459	17.0306	1345	3259	3	3	4	1.5	0.375	2.66667	0.885026
23	Wasonga et al.	Kenya	3	2006	5.1	3.8	459	22.7074	1345	3783	3	3	4	1.5	0.375	2.66667	1.03412
23	Wasonga et al.	Kenya	3	2006	4.8	3.5	470	5.67686	1367	3940	3	3	4	1.5	0.375	2.66667	1.05856
23	Wasonga et al.	Kenya	3	2006	4.8	3.5	470	11.3537	1367	5155	3	3	4	1.5	0.375	2.66667	1.32735
23	Wasonga et al.	Kenya	3	2006	4.8	3.5	470	17.0306	1367	5656	3	3	4	1.5	0.375	2.66667	1.4201
23	Wasonga et al.	Kenya	3	2006	4.8	3.5	470	22.7074	1367	5479	3	3	4	1.5	0.375	2.66667	1.3883
23	Wasonga et al.	Kenya	3	2006	4.8	3.5	470	5.67686	1546	3597	3	3	4	1.5	0.375	2.66667	0.844429
23	Wasonga et al.	Kenya	3	2006	4.8	3.5	470	11.3537	1546	4345	3	3	4	1.5	0.375	2.66667	1.03335
23	Wasonga et al.	Kenya	3	2006	4.8	3.5	470	17.0306	1546	4459	3	3	4	1.5	0.375	2.66667	1.05925
23	Wasonga et al.	Kenya	3	2006	4.8	3.5	470	22.7074	1546	5219	3	3	4	1.5	0.375	2.66667	1.21663
23	Wasonga et al.	Kenya	3	2006	4.8	3.5	470	5.67686	3080	3945	3	3	4	1.5	0.375	2.66667	0.247519
23	Wasonga et al.	Kenya	3	2006	4.8	3.5	470	11.3537	3080	4371	3	3	4	1.5	0.375	2.66667	0.350062
23	Wasonga et al.	Kenya	3	2006	4.8	3.5	470	17.0306	3080	5478	3	3	4	1.5	0.375	2.66667	0.57581
23	Wasonga et al.	Kenya	3	2006	4.8	3.5	470	22.7074	3080	5835	3	3	4	1.5	0.375	2.66667	0.638945
23	Wasonga et al.	Kenya	3	2006	5.4	6.2	380	5.67686	1514	2567	3	3	4	1.5	0.375	2.66667	0.527983
23	Wasonga et al.	Kenya	3	2006	5.4	6.2	380	11.3537	1514	2721	3	3	4	1.5	0.375	2.66667	0.586244
23	Wasonga et al.	Kenya	3	2006	5.4	6.2	380	17.0306	1514	3781	3	3	4	1.5	0.375	2.66667	0.915233
23	Wasonga et al.	Kenya	3	2006	5.4	6.2	380	22.7074	1514	2964	3	3	4	1.5	0.375	2.66667	0.671785
23	Wasonga et al.	Kenya	3	2006	5.4	6.2	380	5.67686	1250	2056	3	3	4	1.5	0.375	2.66667	0.497619
23	Wasonga et al.	Kenya	3	2006	5.5	8	452	5.67686	1250	2771	3	3	4	1.5	0.375	2.66667	0.796065
23	Wasonga et al.	Kenya	3	2006	5.5	8	452	11.3537	1250	3957	3	3	4	1.5	0.375	2.66667	1.15234
23	Wasonga et al.	Kenya	3	2006	5.5	8	452	17.0306	1250	2732	3	3	4	1.5	0.375	2.66667	0.78189
23	Wasonga et al.	Kenya	3	2006	5.5	8	452	22.7074	1250	2689	3	3	4	1.5	0.375	2.66667	0.766026
23	Wasonga et al.	Kenya	3	2006	5.5	8	452	5.67686	903	2137	3	3	4	1.5	0.375	2.66667	0.861436
23	Wasonga et al.	Kenya	3	2006	5.5	8	452	11.3537	903	2817	3	3	4	1.5	0.375	2.66667	1.13771
23	Wasonga et al.	Kenya	3	2006	5.5	8	452	17.0306	903	2299	3	3	4	1.5	0.375	2.66667	0.934507
23	Wasonga et al.	Kenya	3	2006	5.5	8	452	22.7074	903	2515	3	3	4	1.5	0.375	2.66667	1.02431
23	Wasonga et al.	Kenya	3	2006	5.5	8	452	5.67686	661	2810	3	3	4	1.5	0.375	2.66667	1.44719
23	Wasonga et al.	Kenya	3	2006	5.5	8	452	11.3537	661	2177	3	3	4	1.5	0.375	2.66667	1.19195
23	Wasonga et al.	Kenya	3	2006	5.5	8	452	17.0306	661	2530	3	3	4	1.5	0.375	2.66667	1.34222
23	Wasonga et al.	Kenya	3	2006	5.5	8	452	22.7074	661	2350	3	3	4	1.5	0.375	2.66667	1.26842
24	Otinga et al.	Kenya	4	2009	5.61	12.11	1200-1800	5.67686	3240	3550	4	4	3	2	0.666667	1.5	0.0913743
24	Otinga et al.	Kenya	4	2009	5.61	12.11	1200-1800	11.3537	3240	4620	4	4	3	2	0.666667	1.5	0.354821
24	Otinga et al.	Kenya	4	2009	5.61	12.11	1200-1800	22.7074	3240	5160	4	4	3	2	0.666667	1.5	0.465363
24	Otinga et al.	Kenya	4	2009	4.46	18.6	1200-1800	5.67686	920	2080	4	4	3	2	0.666667	1.5	0.81575
24	Otinga et al.	Kenya	4	2009	4.46	18.6	1200-1800	11.3537	920	2610	4	4	3	2	0.666667	1.5	1.04273
24	Otinga et al.	Kenya	4	2009	4.46	18.6	1200-1800	22.7074	920	3050	4	4	3	2	0.666667	1.5	1.19852
24	Otinga et al.	Kenya	4	2009	5.88	5.69	1200-1800	5.67686	2790	3310	4	4	3	2	0.666667	1.5	0.170907
24	Otinga et al.	Kenya	4	2009	5.88	5.69	1200-1800	11.3537	2790	5000	4	4	3	2	0.666667	1.5	0.583396
24	Otinga et al.	Kenya	4	2009	5.88	5.69	1200-1800	22.7074	2790	5710	4	4	3	2	0.666667	1.5	0.716177
25	Getachew et al.	Ethiopia	4	2012/13	7.1	46.4	988.1	11.3537	6334	7539	4	4	4	2	0.5	2	0.174158
25	Getachew et al.	Ethiopia	5	2012/13	7.1	46.4	988.1	22.7074	6334	8222	5	5	4	2.5	0.625	1.6	0.260882
25	Getachew et al.	Ethiopia	6	2012/13	7.1	46.4	988.1	34.9345	6334	7086	6	6	4	3	0.75	1.33333	0.112189
25	Getachew et al.	Ethiopia	7	2012/13	7.1	46.4	988.1	43.6681	6334	7636	7	7	4	3.5	0.875	1.14286	0.186942
25	Getachew et al.	Ethiopia	8	2012/13	8.4	18.2	815	11.3537	4054	5864	8	8	4	4	1	1	0.369128
25	Getachew et al.	Ethiopia	9	2012/13	8.4	18.2	815	22.7074	4054	6042	9	9	4	4.5	1.125	0.888889	0.399031
25	Getachew et al.	Ethiopia	10	2012/13	8.4	18.2	815	34.9345	4054	5743	10	10	4	5	1.25	0.8	0.348278
25	Getachew et al.	Ethiopia	11	2012/13	8.4	18.2	815	43.6681	4054	5815	11	11	4	5.5	1.375	0.727273	0.360737
25	Getachew et al.	Ethiopia	12	2012/13	7.42	19.2	877	22.7074	3649	5320	12	12	4	6	1.5	0.666667	0.37702
25	Getachew et al.	Ethiopia	13	2012/13	7.42	19.2	877	11.3537	3649	5542	13	13	4	6.5	1.625	0.615385	0.417902
25	Getachew et al.	Ethiopia	14	2012/13	7.42	19.2	877	22.7074	3649	5221	14	14	4	7	1.75	0.571429	0.358236
25	Getachew et al.	Ethiopia	15	2012/13	7.42	19.2	877	34.9345	3649	5226	15	15	4	7.5	1.875	0.533333	0.359193
26	Kang BT et al	Nigeria	3	1971-1973	6.2	0.00084	N/A	43.6681	4056	5293	3	3	4	1.5	0.375	2.66667	0.266188
26	Kang BT et al	Nigeria	3	1971-1973	6.2	0.00084	N/A	22.7074	4056	5903	3	3	4	1.5	0.375	2.66667	0.375263
26	Kang BT et al	Nigeria	3	1971-1973	6.2	0.00084	N/A	34.0611	4056	5330	3	3	4	1.5	0.375	2.66667	0.273154
26	Kang BT et al	Nigeria	3	1971-1973	6.2	0.00084	N/A	45.4148	4056	5423	3	3	4	1.5	0.375	2.66667	0.290452
27	Okalebo JR.	Kenya	3	1974	7.2	0.0055	938.8	13.1004	7713	7683	3	3	3	1.5	0.5	2	-0.00389712
27	Okalebo JR.	Kenya	3	1974	7.2	0.0055	938.8	26.2009	7713	9227	3	3	3	1.5	0.5	2	0.179227
27	Okalebo JR.	Kenya	3	1974	7.2	0.0055	938.8	39.3013	7713	7936	3	3	3	1.5	0.5	2	0.0285022
27	Okalebo JR.	Kenya	3	1974	7.2	0.0055	1196	13.1004	8453	8454	3	3	3	1.5	0.5	2	0.000118294
27	Okalebo JR.	Kenya	3	1974	7.2	0.0055	1196	26.2009	8453	8703	3	3	3	1.5	0.5	2	0.0291464
27	Okalebo JR.	Kenya	3	1974	7.2	0.0055	1196	39.3013	8453	8484	3	3	3	1.5	0.5	2	0.00366063
27	Okalebo JR.	Kenya	3	1974	7.2	0.0055	1886.2	13.1004	8082	7794	3	3	3	1.5	0.5	2	-0.0362852
27	Okalebo JR.	Kenya	3	1974	7.2	0.0055	1886.2	26.2009	8082	8337	3	3	3	1.5	0.5	2	0.0310641
27	Okalebo JR.	Kenya	3	1974	7.2	0.0055	1886.2	39.3013	8082	10750	3	3	3	1.5	0.5	2	0.285266
27	Okalebo JR.	Kenya	3	1974	7.2	0.0055	1417	13.1004	3453	6293	3	3	3	1.5	0.5	2	0.600194
27	Okalebo JR.	Kenya	3	1974	7.2	0.0055	1417	26.2009	3453	6308	3	3	3	1.5	0.5	2	0.602575
27	Okalebo JR.	Kenya	3	1974	7.2	0.0055	1417	39.3013	3453	4190	3	3	3	1.5	0.5	2	0.193457
27	Okalebo JR.	Kenya	3	1975	7.2	0.0055	938.8	13.1004	4690	4570	3	3	3	1.5	0.5	2	-0.0259194
27	Okalebo JR.	Kenya	3	1975	7.2	0.0055	938.8	26.2009	4690	7302	3	3	3	1.5	0.5	2	0.442716
27	Okalebo JR.	Kenya	3	1975	7.2	0.0055	938.8	39.3013	4690	5290	3	3	3	1.5	0.5	2	0.120386
27	Okalebo JR.	Kenya	3	1975	7.2	0.0055	1196	13.1004	5671	7693	3	3	3	1.5	0.5	2	0.304945
27	Okalebo JR.	Kenya	3	1975	7.2	0.0055	1196	26.2009	5671	8053	3	3	3	1.5	0.5	2	0.350679
27	Okalebo JR.	Kenya	3	1975	7.2	0.0055	1196	39.3013	5671	7828	3	3	3	1.5	0.5	2	0.322342
27	Okalebo JR.	Kenya	3	1975	7.2	0.0055	1886.2	13.1004	5900	5888	3	3	3	1.5	0.5	2	-0.00203597
27	Okalebo JR.	Kenya	3	1975	7.2	0.0055	1886.2	26.2009	5900	6552	3	3	3	1.5	0.5	2	0.104818
27	Okalebo JR.	Kenya	3	1975	7.2	0.0055	1886.2	39.3013	5900	5524	3	3	3	1.5	0.5	2	-0.0658501
27	Okalebo JR.	Kenya	3	1975	7.2	0.0055	1417	13.1004	5049	5318	3	3	3	1.5	0.5	2	0.0519071
27	Okalebo JR.	Kenya	3	1975	7.2	0.0055	1417	26.2009	5049	6355	3	3	3	1.5	0.5	2	0.230052
27	Okalebo JR.	Kenya	3	1975	7.2	0.0055	1417	39.3013	5049	4650	3	3	3	1.5	0.5	2	-0.082323
27	Okalebo JR.	Kenya	3	1976	7.2	0.0055	1886.2	26.2009	7234	7056	3	3	3	1.5	0.5	2	-0.0249138
27	Okalebo JR.	Kenya	3	1976	7.2	0.0055	1886.2	39.3013	7234	7881	3	3	3	1.5	0.5	2	0.0856627
27	Okalebo JR.	Kenya	3	1976	7.2	0.0055	1886.2	52.4017	7234	7689	3	3	3	1.5	0.5	2	0.0609986
27	Okalebo JR.	Kenya	3	1976	7.2	0.0055	1417	65.5022	5013	5556	3	3	3	1.5	0.5	2	0.102844
27	Okalebo JR.	Kenya	3	1976	7.2	0.0055	1417	26.2009	5013	6519	3	3	3	1.5	0.5	2	0.262686
27	Okalebo JR.	Kenya	3	1976	7.2	0.0055	1417	39.3013	5013	6112	3	3	3	1.5	0.5	2	0.19822
27	Okalebo JR.	Kenya	3	1976	7.2	0.0055	1196	26.2009	7297	8741	3	3	3	1.5	0.5	2	0.180561
27	Okalebo JR.	Kenya	3	1976	7.2	0.0055	1196	39.3013	7297	7099	3	3	3	1.5	0.5	2	-0.0275094
27	Okalebo JR.	Kenya	3	1976	7.2	0.0055	1196	52.4017	7297	6689	3	3	3	1.5	0.5	2	-0.0869989
27	Okalebo JR.	Kenya	3	1977	7.2	0.0055	1886.2	65.5022	4531	5549	3	3	3	1.5	0.5	2	0.202675
27	Okalebo JR.	Kenya	3	1977	7.2	0.0055	1886.2	34.9345	4531	5537	3	3	3	1.5	0.5	2	0.20051
27	Okalebo JR.	Kenya	3	1977	7.2	0.0055	1886.2	52.4017	4531	5512	3	3	3	1.5	0.5	2	0.195985
27	Okalebo JR.	Kenya	3	1977	7.2	0.0055	1886.2	17.4672	766	2438	3	3	3	1.5	0.5	2	1.15775
27	Okalebo JR.	Kenya	3	1977	7.2	0.0055	1886.2	34.9345	766	2802	3	3	3	1.5	0.5	2	1.29691
27	Okalebo JR.	Kenya	3	1977	7.2	0.0055	1886.2	17.4672	2636	4796	3	3	3	1.5	0.5	2	0.59852
27	Okalebo JR.	Kenya	3	1977	7.2	0.0055	1886.2	34.9345	2636	5136	3	3	3	1.5	0.5	2	0.667012
27	Okalebo JR.	Kenya	3	1977	7.2	0.0055	1886.2	52.4017	2636	4790	3	3	3	1.5	0.5	2	0.597268
27	Okalebo JR.	Kenya	3	1977	7.2	0.0055	1886.2	17.4672	2333	3660	3	3	3	1.5	0.5	2	0.450308
27	Okalebo JR.	Kenya	3	1977	7.2	0.0055	1886.2	34.9345	2333	4623	3	3	3	1.5	0.5	2	0.683889
27	Okalebo JR.	Kenya	3	1977	7.2	0.0055	1886.2	52.4017	2333	3901	3	3	3	1.5	0.5	2	0.514078
27	Okalebo JR.	Kenya	3	1977	7.2	0.0055	1886.2	17.4672	3666	4438	3	3	3	1.5	0.5	2	0.191103
27	Okalebo JR.	Kenya	3	1977	7.2	0.0055	1886.2	34.9345	3666	3926	3	3	3	1.5	0.5	2	0.0685199
27	Okalebo JR.	Kenya	3	1977	7.2	0.0055	1886.2	52.4017	3666	4494	3	3	3	1.5	0.5	2	0.203642
28	Gacheru et al.	Kenya	4	1995	5.5	1.3	N/A	4.36681	2290	2240	4	4	4	2	0.5	2	-0.022076
28	Gacheru et al.	Kenya	4	1995	5.5	1.3	N/A	10.917	2290	2650	4	4	4	2	0.5	2	0.146008
28	Gacheru et al.	Kenya	4	1995	5.5	1.3	N/A	21.8341	2290	3190	4	4	4	2	0.5	2	0.331469
28	Gacheru et al.	Kenya	4	1995	5.5	1.3	N/A	65.5022	2290	3980	4	4	4	2	0.5	2	0.55273
28	Gacheru et al.	Kenya	4	1996	5.5	1.3	N/A	4.36681	1580	1560	4	4	4	2	0.5	2	-0.012739
28	Gacheru et al.	Kenya	4	1996	5.5	1.3	N/A	10.917	1580	2010	4	4	4	2	0.5	2	0.24071
28	Gacheru et al.	Kenya	4	1996	5.5	1.3	N/A	21.8341	1580	2320	4	4	4	2	0.5	2	0.384142
28	Gacheru et al.	Kenya	4	1996	5.5	1.3	N/A	65.5022	1580	2750	4	4	4	2	0.5	2	0.554176
28	Gacheru et al.	Kenya	4	1996	5.5	1.3	N/A	4.36681	1020	1240	4	4	4	2	0.5	2	0.195309
28	Gacheru et al.	Kenya	4	1996	5.5	1.3	N/A	10.917	1020	2860	4	4	4	2	0.5	2	1.03102
28	Gacheru et al.	Kenya	4	1997	5.5	1.3	N/A	4.36681	6590	10660	4	4	4	2	0.5	2	0.480945
28	Gacheru et al.	Kenya	4	1997	5.5	1.3	N/A	10.917	6590	7020	4	4	4	2	0.5	2	0.0632099
28	Gacheru et al.	Kenya	4	1997	5.5	1.3	N/A	21.8341	6590	8170	4	4	4	2	0.5	2	0.214916
28	Gacheru et al.	Kenya	4	1997	5.5	1.3	N/A	65.5022	6590	8840	4	4	4	2	0.5	2	0.293734
29	Ademba et al.	Kenya	3	2007	4.2	16.5	N/A	26.2009	1722	3995	3	3	4	1.5	0.375	2.66667	0.841557
29	Ademba et al.	Kenya	3	2007	4.2	16.5	N/A	26.2009	1722	4961	3	3	4	1.5	0.375	2.66667	1.05812
29	Ademba et al.	Kenya	3	2007	4.2	16.5	N/A	26.2009	1722	3760	3	3	4	1.5	0.375	2.66667	0.780933
30	Adembaa et al	Kenya	3	2007	5.4	0.8	1598	26.2009	1824	2942	3	3	3	1.5	0.5	2	0.478058
30	Adembaa et al	Kenya	3	2007	5.4	0.8	1598	26.2009	1824	2658	3	3	3	1.5	0.5	2	0.376542
30	Adembaa et al	Kenya	3	2007	5.4	0.8	1598	26.2009	1824	3566	3	3	3	1.5	0.5	2	0.670413
30	Adembaa et al	Kenya	3	2007	4.5	0.8	1200–2100	26.2009	1722	2942	3	3	3	1.5	0.5	2	0.535603
30	Adembaa et al	Kenya	3	2007	4.5	0.8	1200–2100	26.2009	1722	3760	3	3	3	1.5	0.5	2	0.780933
30	Adembaa et al	Kenya	3	2007	4.5	0.8	1200–2100	26.2009	1722	4961	3	3	3	1.5	0.5	2	1.05812
32	Msolla MM et al.	Tanzania	4	1999/2000	4.9	31	N/A	34.9345	1507	2025	4	4	3	2	0.666667	1.5	0.295449
32	Msolla MM et al.	Tanzania	4	1999/2000	4.9	31	N/A	34.9345	1507	1782	4	4	3	2	0.666667	1.5	0.167615
32	Msolla MM et al.	Tanzania	4	1999/2000	4.9	31	N/A	34.9345	1507	1778	4	4	3	2	0.666667	1.5	0.165368
32	Msolla MM et al.	Tanzania	4	2001/2002	4.9	31	N/A	34.9345	1642	2590	4	4	3	2	0.666667	1.5	0.455743
32	Msolla MM et al.	Tanzania	4	2001/2002	4.9	31	N/A	34.9345	1642	2442	4	4	3	2	0.666667	1.5	0.396902
32	Msolla MM et al.	Tanzania	4	2001/2002	4.9	31	N/A	34.9345	1642	2465	4	4	3	2	0.666667	1.5	0.406277
32	Msolla MM et al.	Tanzania	4	2002/2003	4.9	31	N/A	34.9345	963	2622	4	4	3	2	0.666667	1.5	1.00164
32	Msolla MM et al.	Tanzania	4	2002/2003	4.9	31	N/A	34.9345	963	2280	4	4	3	2	0.666667	1.5	0.861877
32	Msolla MM et al.	Tanzania	4	2002/2003	4.9	31	N/A	34.9345	963	2300	4	4	3	2	0.666667	1.5	0.870611
32	Msolla MM et al.	Tanzania	4	1999/2000	5.3	1	N/A	34.9345	1155	2438	4	4	3	2	0.666667	1.5	0.747078
32	Msolla MM et al.	Tanzania	4	1999/2000	5.3	1	N/A	34.9345	1155	1810	4	4	3	2	0.666667	1.5	0.449227
32	Msolla MM et al.	Tanzania	4	1999/2000	5.3	1	N/A	34.9345	1155	1870	4	4	3	2	0.666667	1.5	0.481838
32	Msolla MM et al.	Tanzania	4	2001/2002	5.3	1	N/A	34.9345	2027	3997	4	4	3	2	0.666667	1.5	0.678987
32	Msolla MM et al.	Tanzania	4	2001/2002	5.3	1	N/A	34.9345	2027	3645	4	4	3	2	0.666667	1.5	0.586799
32	Msolla MM et al.	Tanzania	4	2001/2002	5.3	1	N/A	34.9345	2027	3505	4	4	3	2	0.666667	1.5	0.547634
32	Msolla MM et al.	Tanzania	4	1999/2000	5.5	2	N/A	34.9345	1412	3007	4	4	3	2	0.666667	1.5	0.755936
32	Msolla MM et al.	Tanzania	4	1999/2000	5.5	2	N/A	34.9345	1412	2438	4	4	3	2	0.666667	1.5	0.546171
32	Msolla MM et al.	Tanzania	4	1999/2000	5.5	2	N/A	34.9345	1412	2357	4	4	3	2	0.666667	1.5	0.512382
32	Msolla MM et al.	Tanzania	4	2001/2002	5.5	2	N/A	34.9345	3247	4482	4	4	3	2	0.666667	1.5	0.322338
32	Msolla MM et al.	Tanzania	4	2001/2002	5.5	2	N/A	34.9345	3247	4352	4	4	3	2	0.666667	1.5	0.292904
32	Msolla MM et al.	Tanzania	4	2001/2002	5.5	2	N/A	34.9345	3247	4325	4	4	3	2	0.666667	1.5	0.286681
32	Msolla MM et al.	Tanzania	4	2002/2003	5.5	2	N/A	34.9345	2553	2665	4	4	3	2	0.666667	1.5	0.0429349
32	Msolla MM et al.	Tanzania	4	2002/2003	5.5	2	N/A	34.9345	2553	5402	4	4	3	2	0.666667	1.5	0.7495
32	Msolla MM et al.	Tanzania	4	2002/2003	5.5	2	N/A	34.9345	2553	5467	4	4	3	2	0.666667	1.5	0.761461
33	Szillas C et al.	Tanzania	4	1998/1999	4.2	5	1510	17.4672	5450	6000	4	4	9	2	0.222222	4.5	0.0961439
33	Szillas C et al.	Tanzania	4	1998/1999	4.2	5	1510	34.9345	5450	7410	4	4	9	2	0.222222	4.5	0.307215
33	Szillas C et al.	Tanzania	4	1998/1999	4.2	5	1510	52.4017	5450	5180	4	4	9	2	0.222222	4.5	-0.0508106
33	Szillas C et al.	Tanzania	4	1998/1999	4.2	5	1510	17.4672	5450	5170	4	4	9	2	0.222222	4.5	-0.0527429
33	Szillas C et al.	Tanzania	4	1998/1999	4.2	5	1510	34.9345	5450	5290	4	4	9	2	0.222222	4.5	-0.0297974
33	Szillas C et al.	Tanzania	4	1998/1999	4.2	5	1510	52.4017	5450	5840	4	4	9	2	0.222222	4.5	0.0691152
33	Szillas C et al.	Tanzania	4	1998/1999	4.2	5	1510	17.4672	5450	4500	4	4	9	2	0.222222	4.5	-0.191538
33	Szillas C et al.	Tanzania	4	1998/1999	4.2	5	1510	34.9345	5450	5490	4	4	9	2	0.222222	4.5	0.00731265
33	Szillas C et al.	Tanzania	4	1998/1999	4.2	5	1510	52.4017	5450	5590	4	4	9	2	0.222222	4.5	0.0253637
33	Szillas C et al.	Tanzania	4	1998/1999	4.1	19	1002	17.4672	1130	1080	4	4	9	2	0.222222	4.5	-0.0452566
33	Szillas C et al.	Tanzania	4	1998/1999	4.1	19	1002	34.9345	1130	2960	4	4	9	2	0.222222	4.5	0.962972
33	Szillas C et al.	Tanzania	4	1998/1999	4.1	19	1002	52.4017	1130	1180	4	4	9	2	0.222222	4.5	0.0432968
33	Szillas C et al.	Tanzania	4	1998/1999	4.1	19	1002	17.4672	1130	1230	4	4	9	2	0.222222	4.5	0.0847965
33	Szillas C et al.	Tanzania	4	1998/1999	4.1	19	1002	34.9345	1130	1200	4	4	9	2	0.222222	4.5	0.0601039
33	Szillas C et al.	Tanzania	4	1998/1999	4.1	19	1002	52.4017	1130	2060	4	4	9	2	0.222222	4.5	0.600488
33	Szillas C et al.	Tanzania	4	1998/1999	4.1	19	1002	17.4672	1130	2910	4	4	9	2	0.222222	4.5	0.945935
33	Szillas C et al.	Tanzania	4	1998/1999	4.1	19	1002	34.9345	1130	1140	4	4	9	2	0.222222	4.5	0.00881063
33	Szillas C et al.	Tanzania	4	1998/1999	4.1	19	1002	52.4017	1130	2080	4	4	9	2	0.222222	4.5	0.61015
33	Szillas C et al.	Tanzania	4	1998/1999	4.1	2	1179	17.4672	1820	2700	4	4	9	2	0.222222	4.5	0.394415
33	Szillas C et al.	Tanzania	4	1998/1999	4.1	2	1179	34.9345	1820	2700	4	4	9	2	0.222222	4.5	0.394415
33	Szillas C et al.	Tanzania	4	1998/1999	4.1	2	1179	52.4017	1820	2990	4	4	9	2	0.222222	4.5	0.496437
33	Szillas C et al.	Tanzania	4	1998/1999	4.1	2	1179	17.4672	1820	2370	4	4	9	2	0.222222	4.5	0.264053
33	Szillas C et al.	Tanzania	4	1998/1999	4.1	2	1179	34.9345	1820	3010	4	4	9	2	0.222222	4.5	0.503104
33	Szillas C et al.	Tanzania	4	1998/1999	4.1	2	1179	52.4017	1820	3080	4	4	9	2	0.222222	4.5	0.526093
33	Szillas C et al.	Tanzania	4	1998/1999	4.1	2	1179	17.4672	1820	2190	4	4	9	2	0.222222	4.5	0.185065
33	Szillas C et al.	Tanzania	4	1998/1999	4.1	2	1179	34.9345	1820	2390	4	4	9	2	0.222222	4.5	0.272457
33	Szillas C et al.	Tanzania	4	1998/1999	4.1	2	1179	52.4017	1820	2750	4	4	9	2	0.222222	4.5	0.412764
33	Szillas C et al.	Tanzania	4	1998/1999	3.8	31	1429	17.4672	2450	2630	4	4	9	2	0.222222	4.5	0.0708958
33	Szillas C et al.	Tanzania	4	1998/1999	3.8	31	1429	34.9345	2450	3100	4	4	9	2	0.222222	4.5	0.235314
33	Szillas C et al.	Tanzania	4	1998/1999	3.8	31	1429	52.4017	2450	2790	4	4	9	2	0.222222	4.5	0.129954
33	Szillas C et al.	Tanzania	4	1998/1999	3.8	31	1429	17.4672	2450	2410	4	4	9	2	0.222222	4.5	-0.0164613
33	Szillas C et al.	Tanzania	4	1998/1999	3.8	31	1429	34.9345	2450	2690	4	4	9	2	0.222222	4.5	0.0934532
33	Szillas C et al.	Tanzania	4	1998/1999	3.8	31	1429	52.4017	2450	2830	4	4	9	2	0.222222	4.5	0.144189
33	Szillas C et al.	Tanzania	4	1998/1999	3.8	31	1429	17.4672	2450	2370	4	4	9	2	0.222222	4.5	-0.0331981
33	Szillas C et al.	Tanzania	4	1998/1999	3.8	31	1429	34.9345	2450	2430	4	4	9	2	0.222222	4.5	-0.00819677
33	Szillas C et al.	Tanzania	4	1998/1999	3.8	31	1429	52.4017	2450	2710	4	4	9	2	0.222222	4.5	0.100861
33	Szillas C et al.	Tanzania	4	1998/1999	5.2	10	1525	17.4672	2130	2310	4	4	9	2	0.222222	4.5	0.0811255
33	Szillas C et al.	Tanzania	4	1998/1999	5.2	10	1525	34.9345	2130	2060	4	4	9	2	0.222222	4.5	-0.033416
33	Szillas C et al.	Tanzania	4	1998/1999	5.2	10	1525	52.4017	2130	3800	4	4	9	2	0.222222	4.5	0.578879
33	Szillas C et al.	Tanzania	4	1998/1999	5.2	10	1525	17.4672	2130	2420	4	4	9	2	0.222222	4.5	0.127646
33	Szillas C et al.	Tanzania	4	1998/1999	5.2	10	1525	34.9345	2130	2100	4	4	9	2	0.222222	4.5	-0.0141846
33	Szillas C et al.	Tanzania	4	1998/1999	5.2	10	1525	52.4017	2130	2690	4	4	9	2	0.222222	4.5	0.233419
33	Szillas C et al.	Tanzania	4	1998/1999	5.2	10	1525	17.4672	2130	2510	4	4	9	2	0.222222	4.5	0.164161
33	Szillas C et al.	Tanzania	4	1998/1999	5.2	10	1525	34.9345	2130	2000	4	4	9	2	0.222222	4.5	-0.0629748
33	Szillas C et al.	Tanzania	4	1998/1999	5.2	10	1525	52.4017	2130	2150	4	4	9	2	0.222222	4.5	0.00934586
33	Szillas C et al.	Tanzania	4	1998/1999	4.8	12	1396	17.4672	5520	7290	4	4	9	2	0.222222	4.5	0.278126
33	Szillas C et al.	Tanzania	4	1998/1999	4.8	12	1396	34.9345	5520	5510	4	4	9	2	0.222222	4.5	-0.00181324
33	Szillas C et al.	Tanzania	4	1998/1999	4.8	12	1396	52.4017	5520	5830	4	4	9	2	0.222222	4.5	0.0546391
33	Szillas C et al.	Tanzania	4	1998/1999	4.8	12	1396	17.4672	5520	5840	4	4	9	2	0.222222	4.5	0.0563529
33	Szillas C et al.	Tanzania	4	1998/1999	4.8	12	1396	34.9345	5520	5740	4	4	9	2	0.222222	4.5	0.0390814
33	Szillas C et al.	Tanzania	4	1998/1999	4.8	12	1396	52.4017	5520	5600	4	4	9	2	0.222222	4.5	0.0143887
33	Szillas C et al.	Tanzania	4	1998/1999	4.8	12	1396	17.4672	5520	5620	4	4	9	2	0.222222	4.5	0.0179538
33	Szillas C et al.	Tanzania	4	1998/1999	4.8	12	1396	34.9345	5520	5490	4	4	9	2	0.222222	4.5	-0.0054496
33	Szillas C et al.	Tanzania	4	1998/1999	4.8	12	1396	52.4017	5520	6950	4	4	9	2	0.222222	4.5	0.230364
33	Szillas C et al.	Tanzania	4	1998/1999	4.4	9	1047	17.4672	6500	6700	4	4	9	2	0.222222	4.5	0.0303053
33	Szillas C et al.	Tanzania	4	1998/1999	4.4	9	1047	34.9345	6500	6630	4	4	9	2	0.222222	4.5	0.0198026
33	Szillas C et al.	Tanzania	4	1998/1999	4.4	9	1047	52.4017	6500	6980	4	4	9	2	0.222222	4.5	0.0712467
33	Szillas C et al.	Tanzania	4	1998/1999	4.4	9	1047	17.4672	6500	6150	4	4	9	2	0.222222	4.5	-0.0553501
33	Szillas C et al.	Tanzania	4	1998/1999	4.4	9	1047	34.9345	6500	6460	4	4	9	2	0.222222	4.5	-0.00617286
33	Szillas C et al.	Tanzania	4	1998/1999	4.4	9	1047	52.4017	6500	6970	4	4	9	2	0.222222	4.5	0.069813
33	Szillas C et al.	Tanzania	4	1998/1999	4.4	9	1047	17.4672	6500	6660	4	4	9	2	0.222222	4.5	0.0243173
33	Szillas C et al.	Tanzania	4	1998/1999	4.4	9	1047	34.9345	6500	6890	4	4	9	2	0.222222	4.5	0.0582689
33	Szillas C et al.	Tanzania	4	1998/1999	4.4	9	1047	52.4017	6500	6250	4	4	9	2	0.222222	4.5	-0.0392207
33	Szillas C et al.	Tanzania	4	1998/1999	4.8	4	1047	17.4672	2420	3080	4	4	9	2	0.222222	4.5	0.241162
33	Szillas C et al.	Tanzania	4	1998/1999	4.8	4	1047	34.9345	2420	2870	4	4	9	2	0.222222	4.5	0.170544
33	Szillas C et al.	Tanzania	4	1998/1999	4.8	4	1047	52.4017	2420	3420	4	4	9	2	0.222222	4.5	0.345873
33	Szillas C et al.	Tanzania	4	1998/1999	4.8	4	1047	17.4672	2420	3560	4	4	9	2	0.222222	4.5	0.385993
33	Szillas C et al.	Tanzania	4	1998/1999	4.8	4	1047	34.9345	2420	5700	4	4	9	2	0.222222	4.5	0.856699
33	Szillas C et al.	Tanzania	4	1998/1999	4.8	4	1047	52.4017	2420	3070	4	4	9	2	0.222222	4.5	0.23791
33	Szillas C et al.	Tanzania	4	1998/1999	4.8	4	1047	17.4672	2420	3170	4	4	9	2	0.222222	4.5	0.269964
33	Szillas C et al.	Tanzania	4	1998/1999	4.8	4	1047	34.9345	2420	2810	4	4	9	2	0.222222	4.5	0.149417
33	Szillas C et al.	Tanzania	4	1998/1999	4.8	4	1047	52.4017	2420	2900	4	4	9	2	0.222222	4.5	0.180943
33	Szillas C et al.	Tanzania	4	1998/1999	4.6	1	1268	17.4672	400	900	4	4	9	2	0.222222	4.5	0.81093
33	Szillas C et al.	Tanzania	4	1998/1999	4.6	1	1268	34.9345	400	1500	4	4	9	2	0.222222	4.5	1.32176
33	Szillas C et al.	Tanzania	4	1998/1999	4.6	1	1268	52.4017	400	1640	4	4	9	2	0.222222	4.5	1.41099
33	Szillas C et al.	Tanzania	4	1998/1999	4.6	1	1268	17.4672	400	580	4	4	9	2	0.222222	4.5	0.371564
33	Szillas C et al.	Tanzania	4	1998/1999	4.6	1	1268	34.9345	400	1150	4	4	9	2	0.222222	4.5	1.05605
33	Szillas C et al.	Tanzania	4	1998/1999	4.6	1	1268	52.4017	400	1510	4	4	9	2	0.222222	4.5	1.3284
33	Szillas C et al.	Tanzania	4	1998/1999	4.6	1	1268	17.4672	400	1200	4	4	9	2	0.222222	4.5	1.09861
33	Szillas C et al.	Tanzania	4	1998/2000	4.7	4	1345	17.4672	4220	5390	4	4	9	2	0.222222	4.5	0.24471
33	Szillas C et al.	Tanzania	4	1998/1999	4.7	4	1345	34.9345	4220	6039	4	4	9	2	0.222222	4.5	0.358403
33	Szillas C et al.	Tanzania	4	1998/1999	4.7	4	1345	52.4017	4220	6150	4	4	9	2	0.222222	4.5	0.376617
33	Szillas C et al.	Tanzania	4	1998/1999	4.7	4	1345	17.4672	4220	5020	4	4	9	2	0.222222	4.5	0.173595
33	Szillas C et al.	Tanzania	4	1998/1999	4.7	4	1345	34.9345	4220	5130	4	4	9	2	0.222222	4.5	0.195271
33	Szillas C et al.	Tanzania	4	1998/1999	4.7	4	1345	52.4017	4220	5180	4	4	9	2	0.222222	4.5	0.20497
33	Szillas C et al.	Tanzania	4	1998/1999	4.7	4	1345	17.4672	4220	4990	4	4	9	2	0.222222	4.5	0.167601
33	Szillas C et al.	Tanzania	4	1998/1999	4.7	4	1345	34.9345	4220	5590	4	4	9	2	0.222222	4.5	0.281144
33	Szillas C et al.	Tanzania	4	1998/1999	4.7	4	1345	52.4017	4220	5580	4	4	9	2	0.222222	4.5	0.279354
33	Szillas C et al.	Tanzania	4	1999/2000	4.2	5	1510	17.4672	4620	4870	4	4	9	2	0.222222	4.5	0.0526992
33	Szillas C et al.	Tanzania	4	1999/2000	4.2	5	1510	34.9345	4620	4930	4	4	9	2	0.222222	4.5	0.0649443
33	Szillas C et al.	Tanzania	4	1999/2000	4.2	5	1510	52.4017	4620	5060	4	4	9	2	0.222222	4.5	0.0909718
33	Szillas C et al.	Tanzania	4	1999/2000	4.2	5	1510	17.4672	4620	4800	4	4	9	2	0.222222	4.5	0.0382212
33	Szillas C et al.	Tanzania	4	1999/2000	4.2	5	1510	34.9345	4620	4380	4	4	9	2	0.222222	4.5	-0.053346
33	Szillas C et al.	Tanzania	4	1999/2000	4.2	5	1510	52.4017	4620	5250	4	4	9	2	0.222222	4.5	0.127833
33	Szillas C et al.	Tanzania	4	1999/2000	4.2	5	1510	17.4672	4620	5300	4	4	9	2	0.222222	4.5	0.137312
33	Szillas C et al.	Tanzania	4	1999/2000	4.2	5	1510	34.9345	4620	5120	4	4	9	2	0.222222	4.5	0.10276
33	Szillas C et al.	Tanzania	4	1999/2000	4.2	5	1510	52.4017	4620	5330	4	4	9	2	0.222222	4.5	0.142957
33	Szillas C et al.	Tanzania	4	1999/2000	4.1	19	1002	17.4672	1650	1590	4	4	9	2	0.222222	4.5	-0.0370413
33	Szillas C et al.	Tanzania	4	1999/2000	4.1	19	1002	34.9345	1650	1390	4	4	9	2	0.222222	4.5	-0.171472
33	Szillas C et al.	Tanzania	4	1999/2000	4.1	19	1002	52.4017	1650	1840	4	4	9	2	0.222222	4.5	0.10899
33	Szillas C et al.	Tanzania	4	1999/2000	4.1	19	1002	17.4672	1650	2390	4	4	9	2	0.222222	4.5	0.370518
33	Szillas C et al.	Tanzania	4	1999/2000	4.1	19	1002	34.9345	1650	1760	4	4	9	2	0.222222	4.5	0.0645385
33	Szillas C et al.	Tanzania	4	1999/2000	4.1	19	1002	52.4017	1650	2300	4	4	9	2	0.222222	4.5	0.332134
33	Szillas C et al.	Tanzania	4	1999/2000	4.1	19	1002	34.9345	1650	1830	4	4	9	2	0.222222	4.5	0.103541
33	Szillas C et al.	Tanzania	4	1999/2000	4.1	19	1002	52.4017	1650	1690	4	4	9	2	0.222222	4.5	0.0239532
33	Szillas C et al.	Tanzania	4	1999/2000	4.1	2	1179	17.4672	970	1820	4	4	9	2	0.222222	4.5	0.629296
33	Szillas C et al.	Tanzania	4	1999/2000	4.1	2	1179	34.9345	970	1620	4	4	9	2	0.222222	4.5	0.512885
33	Szillas C et al.	Tanzania	4	1999/2000	4.1	2	1179	52.4017	970	1660	4	4	9	2	0.222222	4.5	0.537277
33	Szillas C et al.	Tanzania	4	1999/2000	4.1	2	1179	17.4672	970	1450	4	4	9	2	0.222222	4.5	0.402023
33	Szillas C et al.	Tanzania	4	1999/2000	4.1	2	1179	34.9345	970	1850	4	4	9	2	0.222222	4.5	0.645645
33	Szillas C et al.	Tanzania	4	1999/2000	4.1	2	1179	52.4017	970	1650	4	4	9	2	0.222222	4.5	0.531234
33	Szillas C et al.	Tanzania	4	1999/2000	4.1	2	1179	17.4672	970	1370	4	4	9	2	0.222222	4.5	0.34527
33	Szillas C et al.	Tanzania	4	1999/2000	4.1	2	1179	34.9345	970	1340	4	4	9	2	0.222222	4.5	0.323129
33	Szillas C et al.	Tanzania	4	1999/2000	4.1	2	1179	52.4017	970	1760	4	4	9	2	0.222222	4.5	0.595773
33	Szillas C et al.	Tanzania	4	1999/2000	3.8	31	1429	17.4672	1490	2660	4	4	9	2	0.222222	4.5	0.57955
33	Szillas C et al.	Tanzania	4	1999/2000	3.8	31	1429	34.9345	490	910	4	4	9	2	0.222222	4.5	0.619039
33	Szillas C et al.	Tanzania	4	1999/2000	3.8	31	1429	52.4017	1490	2630	4	4	9	2	0.222222	4.5	0.568208
33	Szillas C et al.	Tanzania	4	1999/2000	3.8	31	1429	17.4672	1490	2750	4	4	9	2	0.222222	4.5	0.612825
33	Szillas C et al.	Tanzania	4	1999/2000	3.8	31	1429	34.9345	490	960	4	4	9	2	0.222222	4.5	0.672528
33	Szillas C et al.	Tanzania	4	1999/2000	3.8	31	1429	52.4017	1490	2720	4	4	9	2	0.222222	4.5	0.601856
33	Szillas C et al.	Tanzania	4	1999/2000	3.8	31	1429	17.4672	1490	2690	4	4	9	2	0.222222	4.5	0.590765
33	Szillas C et al.	Tanzania	4	1999/2000	3.8	31	1429	34.9345	1490	2800	4	4	9	2	0.222222	4.5	0.630843
33	Szillas C et al.	Tanzania	4	1999/2000	3.8	31	1429	52.4017	1490	2780	4	4	9	2	0.222222	4.5	0.623675
33	Szillas C et al.	Tanzania	4	1999/2000	5.2	10	1525	17.4672	2530	2990	4	4	9	2	0.222222	4.5	0.167054
33	Szillas C et al.	Tanzania	4	1999/2000	5.2	10	1525	34.9345	2530	4070	4	4	9	2	0.222222	4.5	0.475424
33	Szillas C et al.	Tanzania	4	1999/2000	5.2	10	1525	52.4017	2530	2890	4	4	9	2	0.222222	4.5	0.133037
33	Szillas C et al.	Tanzania	4	1999/2000	5.2	10	1525	17.4672	2530	3290	4	4	9	2	0.222222	4.5	0.262668
33	Szillas C et al.	Tanzania	4	1999/2000	5.2	10	1525	52.4017	2530	4420	4	4	9	2	0.222222	4.5	0.55792
33	Szillas C et al.	Tanzania	4	1999/2000	5.2	10	1525	17.4672	2530	5440	4	4	9	2	0.222222	4.5	0.76556
33	Szillas C et al.	Tanzania	4	1999/2000	5.2	10	1525	34.9345	2530	3130	4	4	9	2	0.222222	4.5	0.212814
33	Szillas C et al.	Tanzania	4	1999/2000	5.2	10	1525	52.4017	2530	3410	4	4	9	2	0.222222	4.5	0.298493
33	Szillas C et al.	Tanzania	4	1999/2000	4.8	12	1396	17.4672	3860	5210	4	4	9	2	0.222222	4.5	0.299913
33	Szillas C et al.	Tanzania	4	1999/2000	4.8	12	1396	34.9345	3860	3740	4	4	9	2	0.222222	4.5	-0.0315816
33	Szillas C et al.	Tanzania	4	1999/2000	4.8	12	1396	52.4017	3860	4290	4	4	9	2	0.222222	4.5	0.10562
33	Szillas C et al.	Tanzania	4	1999/2000	4.8	12	1396	17.4672	3860	3940	4	4	9	2	0.222222	4.5	0.0205135
33	Szillas C et al.	Tanzania	4	1999/2000	4.8	12	1396	34.9345	3860	3950	4	4	9	2	0.222222	4.5	0.0230484
33	Szillas C et al.	Tanzania	4	1999/2000	4.8	12	1396	52.4017	3860	4390	4	4	9	2	0.222222	4.5	0.128662
33	Szillas C et al.	Tanzania	4	1999/2000	4.8	12	1396	17.4672	3860	4280	4	4	9	2	0.222222	4.5	0.103286
33	Szillas C et al.	Tanzania	4	1999/2000	4.8	12	1396	34.9345	3860	4380	4	4	9	2	0.222222	4.5	0.126382
33	Szillas C et al.	Tanzania	4	1999/2000	4.8	12	1396	52.4017	3860	4220	4	4	9	2	0.222222	4.5	0.0891679
33	Szillas C et al.	Tanzania	4	1999/2000	4.4	9	1047	17.4672	3860	4360	4	4	9	2	0.222222	4.5	0.121805
33	Szillas C et al.	Tanzania	4	1999/2000	4.4	9	1047	34.9345	3860	4450	4	4	9	2	0.222222	4.5	0.142237
33	Szillas C et al.	Tanzania	4	1999/2000	4.4	9	1047	52.4017	3860	3770	4	4	9	2	0.222222	4.5	-0.0235922
33	Szillas C et al.	Tanzania	4	1999/2000	4.4	9	1047	34.9345	3860	4510	4	4	9	2	0.222222	4.5	0.15563
33	Szillas C et al.	Tanzania	4	1999/2000	4.4	9	1047	52.4017	3860	3420	4	4	9	2	0.222222	4.5	-0.121027
33	Szillas C et al.	Tanzania	4	1999/2000	4.4	9	1047	17.4672	3860	4310	4	4	9	2	0.222222	4.5	0.110271
33	Szillas C et al.	Tanzania	4	1999/2000	4.4	9	1047	34.9345	3860	3740	4	4	9	2	0.222222	4.5	-0.0315816
33	Szillas C et al.	Tanzania	4	1999/2000	4.4	9	1047	52.4017	3860	4270	4	4	9	2	0.222222	4.5	0.100947
33	Szillas C et al.	Tanzania	4	1999/2000	4.8	4	1047	17.4672	1230	1550	4	4	9	2	0.222222	4.5	0.231241
33	Szillas C et al.	Tanzania	4	1999/2000	4.8	4	1047	34.9345	1230	1310	4	4	9	2	0.222222	4.5	0.063013
33	Szillas C et al.	Tanzania	4	1999/2000	4.8	4	1047	34.9345	1230	2130	4	4	9	2	0.222222	4.5	0.549108
33	Szillas C et al.	Tanzania	4	1999/2000	4.8	4	1047	17.4672	1230	2270	4	4	9	2	0.222222	4.5	0.612766
33	Szillas C et al.	Tanzania	4	1999/2000	4.8	4	1047	34.9345	1230	1320	4	4	9	2	0.222222	4.5	0.0706176
33	Szillas C et al.	Tanzania	4	1999/2000	4.8	4	1047	52.4017	1230	1280	4	4	9	2	0.222222	4.5	0.0398459
33	Szillas C et al.	Tanzania	4	1999/2000	4.7	4	1345	17.4672	2280	5330	4	4	9	2	0.222222	4.5	0.849176
33	Szillas C et al.	Tanzania	4	1999/2000	4.7	4	1345	34.9345	2280	5550	4	4	9	2	0.222222	4.5	0.889622
33	Szillas C et al.	Tanzania	4	1999/2000	4.7	4	1345	52.4017	2280	5650	4	4	9	2	0.222222	4.5	0.90748
33	Szillas C et al.	Tanzania	4	1999/2000	4.7	4	1345	17.4672	2280	4880	4	4	9	2	0.222222	4.5	0.76097
33	Szillas C et al.	Tanzania	4	1999/2000	4.7	4	1345	34.9345	2280	4780	4	4	9	2	0.222222	4.5	0.740265
33	Szillas C et al.	Tanzania	4	1999/2000	4.7	4	1345	52.4017	2280	5130	4	4	9	2	0.222222	4.5	0.81093
33	Szillas C et al.	Tanzania	4	1999/2000	4.7	4	1345	17.4672	2280	4830	4	4	9	2	0.222222	4.5	0.750671
33	Szillas C et al.	Tanzania	4	1999/2000	4.7	4	1345	34.9345	2280	5370	4	4	9	2	0.222222	4.5	0.856652
33	Szillas C et al.	Tanzania	4	1999/2000	4.7	4	1345	52.4017	2280	5650	4	4	9	2	0.222222	4.5	0.90748
33	Szillas C et al.	Tanzania	4	2000/2001	4.2	5	1510	17.4672	3888	4870	4	4	9	2	0.222222	4.5	0.225199
33	Szillas C et al.	Tanzania	4	2000/2001	4.2	5	1510	26.2009	3888	3990	4	4	9	2	0.222222	4.5	0.0258963
33	Szillas C et al.	Tanzania	4	2000/2001	4.2	5	1510	34.9345	3888	4790	4	4	9	2	0.222222	4.5	0.208636
33	Szillas C et al.	Tanzania	4	2000/2001	4.2	5	1510	17.4672	3888	4600	4	4	9	2	0.222222	4.5	0.168161
33	Szillas C et al.	Tanzania	4	2000/2001	4.2	5	1510	26.2009	3888	4130	4	4	9	2	0.222222	4.5	0.0603825
33	Szillas C et al.	Tanzania	4	2000/2001	4.2	5	1510	34.9345	3888	3960	4	4	9	2	0.222222	4.5	0.0183491
33	Szillas C et al.	Tanzania	4	2000/2001	4.2	5	1510	17.4672	3888	3600	4	4	9	2	0.222222	4.5	-0.076961
33	Szillas C et al.	Tanzania	4	2000/2001	4.2	5	1510	26.2009	3888	3830	4	4	9	2	0.222222	4.5	-0.0150301
33	Szillas C et al.	Tanzania	4	2000/2001	4.2	5	1510	34.9345	3888	3750	4	4	9	2	0.222222	4.5	-0.036139
33	Szillas C et al.	Tanzania	4	2000/2001	4.1	19	1002	17.4672	3010	4430	4	4	9	2	0.222222	4.5	0.38646
33	Szillas C et al.	Tanzania	4	2000/2001	4.1	19	1002	26.2009	3010	2950	4	4	9	2	0.222222	4.5	-0.0201349
33	Szillas C et al.	Tanzania	4	2000/2001	4.1	19	1002	34.9345	3010	3290	4	4	9	2	0.222222	4.5	0.0889475
33	Szillas C et al.	Tanzania	4	2000/2001	4.1	19	1002	17.4672	3010	3130	4	4	9	2	0.222222	4.5	0.0390929
33	Szillas C et al.	Tanzania	4	2000/2001	4.1	19	1002	26.2009	3010	3110	4	4	9	2	0.222222	4.5	0.0326826
33	Szillas C et al.	Tanzania	4	2000/2001	4.1	19	1002	34.9345	3010	3070	4	4	9	2	0.222222	4.5	0.0197375
33	Szillas C et al.	Tanzania	4	2000/2001	4.1	19	1002	17.4672	3010	3180	4	4	9	2	0.222222	4.5	0.0549411
33	Szillas C et al.	Tanzania	4	2000/2001	4.1	19	1002	26.2009	3010	3140	4	4	9	2	0.222222	4.5	0.0422827
33	Szillas C et al.	Tanzania	4	2000/2001	4.1	19	1002	34.9345	3010	3150	4	4	9	2	0.222222	4.5	0.0454624
33	Szillas C et al.	Tanzania	4	2000/2001	4.1	2	1179	17.4672	1760	3310	4	4	9	2	0.222222	4.5	0.631634
33	Szillas C et al.	Tanzania	4	2000/2001	4.1	2	1179	26.2009	1760	3200	4	4	9	2	0.222222	4.5	0.597837
33	Szillas C et al.	Tanzania	4	2000/2001	4.1	2	1179	34.9345	1760	3730	4	4	9	2	0.222222	4.5	0.751094
33	Szillas C et al.	Tanzania	4	2000/2001	4.1	2	1179	17.4672	1760	2660	4	4	9	2	0.222222	4.5	0.413012
33	Szillas C et al.	Tanzania	4	2000/2001	4.1	2	1179	26.2009	1760	3540	4	4	9	2	0.222222	4.5	0.698813
33	Szillas C et al.	Tanzania	4	2000/2001	4.1	2	1179	34.9345	1760	3170	4	4	9	2	0.222222	4.5	0.588418
33	Szillas C et al.	Tanzania	4	2000/2001	4.1	2	1179	17.4672	1760	2870	4	4	9	2	0.222222	4.5	0.488998
33	Szillas C et al.	Tanzania	4	2000/2001	4.1	2	1179	26.2009	1760	2680	4	4	9	2	0.222222	4.5	0.420503
33	Szillas C et al.	Tanzania	4	2000/2001	4.1	2	1179	34.9345	1760	3320	4	4	9	2	0.222222	4.5	0.634651
33	Szillas C et al.	Tanzania	4	2000/2001	3.8	31	1429	17.4672	1330	1730	4	4	9	2	0.222222	4.5	0.262942
33	Szillas C et al.	Tanzania	4	2000/2001	3.8	31	1429	26.2009	1330	2030	4	4	9	2	0.222222	4.5	0.422857
33	Szillas C et al.	Tanzania	4	2000/2001	3.8	31	1429	34.9345	1330	2170	4	4	9	2	0.222222	4.5	0.489548
33	Szillas C et al.	Tanzania	4	2000/2001	3.8	31	1429	17.4672	1330	1700	4	4	9	2	0.222222	4.5	0.245449
33	Szillas C et al.	Tanzania	4	2000/2001	3.8	31	1429	26.2009	1330	2400	4	4	9	2	0.222222	4.5	0.59029
33	Szillas C et al.	Tanzania	4	2000/2001	3.8	31	1429	34.9345	1330	2160	4	4	9	2	0.222222	4.5	0.484929
33	Szillas C et al.	Tanzania	4	2000/2001	3.8	31	1429	17.4672	1330	1820	4	4	9	2	0.222222	4.5	0.313658
33	Szillas C et al.	Tanzania	4	2000/2001	3.8	31	1429	26.2009	1330	1930	4	4	9	2	0.222222	4.5	0.372341
33	Szillas C et al.	Tanzania	4	2000/2001	3.8	31	1429	34.9345	1330	2420	4	4	9	2	0.222222	4.5	0.598589
33	Szillas C et al.	Tanzania	4	2000/2001	5.2	10	1525	17.4672	3170	3320	4	4	9	2	0.222222	4.5	0.0462332
33	Szillas C et al.	Tanzania	4	2000/2001	5.2	10	1525	26.2009	3170	3410	4	4	9	2	0.222222	4.5	0.0729807
33	Szillas C et al.	Tanzania	4	2000/2001	5.2	10	1525	34.9345	3170	3310	4	4	9	2	0.222222	4.5	0.0432166
33	Szillas C et al.	Tanzania	4	2000/2001	5.2	10	1525	17.4672	3170	3260	4	4	9	2	0.222222	4.5	0.0279956
33	Szillas C et al.	Tanzania	4	2000/2001	5.2	10	1525	26.2009	3170	3890	4	4	9	2	0.222222	4.5	0.204678
33	Szillas C et al.	Tanzania	4	2000/2001	5.2	10	1525	34.9345	3170	3460	4	4	9	2	0.222222	4.5	0.087537
33	Szillas C et al.	Tanzania	4	2000/2001	5.2	10	1525	17.4672	3170	2970	4	4	9	2	0.222222	4.5	-0.0651696
33	Szillas C et al.	Tanzania	4	2000/2001	5.2	10	1525	26.2009	3170	2780	4	4	9	2	0.222222	4.5	-0.131281
33	Szillas C et al.	Tanzania	4	2000/2001	5.2	10	1525	34.9345	3170	3370	4	4	9	2	0.222222	4.5	0.0611812
33	Szillas C et al.	Tanzania	4	2000/2001	4.8	12	1396	17.4672	3900	4500	4	4	9	2	0.222222	4.5	0.143101
33	Szillas C et al.	Tanzania	4	2000/2001	4.8	12	1396	26.2009	3900	3930	4	4	9	2	0.222222	4.5	0.00766287
33	Szillas C et al.	Tanzania	4	2000/2001	4.8	12	1396	34.9345	3900	4290	4	4	9	2	0.222222	4.5	0.0953102
33	Szillas C et al.	Tanzania	4	2000/2001	4.8	12	1396	17.4672	3900	4080	4	4	9	2	0.222222	4.5	0.0451204
33	Szillas C et al.	Tanzania	4	2000/2001	4.8	12	1396	34.9345	3900	3790	4	4	9	2	0.222222	4.5	-0.0286105
33	Szillas C et al.	Tanzania	4	2000/2001	4.8	12	1396	52.4017	3900	4250	4	4	9	2	0.222222	4.5	0.0859424
33	Szillas C et al.	Tanzania	4	2000/2001	4.8	12	1396	17.4672	3900	4240	4	4	9	2	0.222222	4.5	0.0835867
33	Szillas C et al.	Tanzania	4	2000/2001	4.8	12	1396	26.2009	3900	4560	4	4	9	2	0.222222	4.5	0.156346
33	Szillas C et al.	Tanzania	4	2000/2001	4.8	12	1396	34.9345	3900	4140	4	4	9	2	0.222222	4.5	0.0597192
33	Szillas C et al.	Tanzania	4	2000/2001	4.4	9	1047	17.4672	2680	3220	4	4	9	2	0.222222	4.5	0.183565
33	Szillas C et al.	Tanzania	4	2000/2001	4.4	9	1047	26.2009	2680	3120	4	4	9	2	0.222222	4.5	0.152016
33	Szillas C et al.	Tanzania	4	2000/2001	4.4	9	1047	34.9345	2680	3080	4	4	9	2	0.222222	4.5	0.139113
33	Szillas C et al.	Tanzania	4	2000/2001	4.4	9	1047	17.4672	2680	3370	4	4	9	2	0.222222	4.5	0.229096
33	Szillas C et al.	Tanzania	4	2000/2001	4.4	9	1047	26.2009	2680	3210	4	4	9	2	0.222222	4.5	0.180454
33	Szillas C et al.	Tanzania	4	2000/2001	4.4	9	1047	34.9345	2680	2940	4	4	9	2	0.222222	4.5	0.0925928
33	Szillas C et al.	Tanzania	4	2000/2001	4.4	9	1047	17.4672	2680	2990	4	4	9	2	0.222222	4.5	0.109457
33	Szillas C et al.	Tanzania	4	2000/2001	4.4	9	1047	34.9345	2680	3140	4	4	9	2	0.222222	4.5	0.158406
33	Szillas C et al.	Tanzania	4	2000/2001	4.4	9	1047	52.4017	2680	3100	4	4	9	2	0.222222	4.5	0.145585
33	Szillas C et al.	Tanzania	4	2000/2001	4.8	4	1047	17.4672	890	3520	4	4	9	2	0.222222	4.5	1.37499
33	Szillas C et al.	Tanzania	4	2000/2001	4.8	4	1047	34.9345	890	3080	4	4	9	2	0.222222	4.5	1.24146
33	Szillas C et al.	Tanzania	4	2000/2001	4.8	4	1047	52.4017	890	3221	4	4	9	2	0.222222	4.5	1.28623
33	Szillas C et al.	Tanzania	4	2000/2001	4.8	4	1047	17.4672	890	2930	4	4	9	2	0.222222	4.5	1.19154
33	Szillas C et al.	Tanzania	4	2000/2001	4.8	4	1047	34.9345	890	2490	4	4	9	2	0.222222	4.5	1.02882
33	Szillas C et al.	Tanzania	4	2000/2001	4.8	4	1047	52.4017	890	3215	4	4	9	2	0.222222	4.5	1.28436
33	Szillas C et al.	Tanzania	4	2000/2001	4.8	4	1047	17.4672	890	2710	4	4	9	2	0.222222	4.5	1.11348
33	Szillas C et al.	Tanzania	4	2000/2001	4.8	4	1047	34.9345	890	3090	4	4	9	2	0.222222	4.5	1.2447
33	Szillas C et al.	Tanzania	4	2000/2001	4.8	4	1047	52.4017	890	2760	4	4	9	2	0.222222	4.5	1.13176
33	Szillas C et al.	Tanzania	4	2000/2001	4.6	1	1268	17.4672	900	2030	4	4	9	2	0.222222	4.5	0.813396
33	Szillas C et al.	Tanzania	4	2000/2001	4.6	1	1268	34.9345	900	3220	4	4	9	2	0.222222	4.5	1.27474
33	Szillas C et al.	Tanzania	4	2000/2001	4.6	1	1268	52.4017	900	3114	4	4	9	2	0.222222	4.5	1.24127
33	Szillas C et al.	Tanzania	4	2000/2001	4.6	1	1268	17.4672	900	2430	4	4	9	2	0.222222	4.5	0.993252
33	Szillas C et al.	Tanzania	4	2000/2001	4.6	1	1268	34.9345	900	3310	4	4	9	2	0.222222	4.5	1.30231
33	Szillas C et al.	Tanzania	4	2000/2001	4.6	1	1268	17.4672	900	2510	4	4	9	2	0.222222	4.5	1.02564
33	Szillas C et al.	Tanzania	4	2000/2001	4.6	1	1268	34.9345	900	3180	4	4	9	2	0.222222	4.5	1.26224
33	Szillas C et al.	Tanzania	4	2000/2001	4.6	1	1268	52.4017	900	2840	4	4	9	2	0.222222	4.5	1.14916
33	Szillas C et al.	Tanzania	4	2000/2001	4.7	4	1345	17.4672	3890	5670	4	4	9	2	0.222222	4.5	0.37678
33	Szillas C et al.	Tanzania	4	2000/2001	4.7	4	1345	34.9345	3890	5640	4	4	9	2	0.222222	4.5	0.371475
33	Szillas C et al.	Tanzania	4	2000/2001	4.7	4	1345	52.4017	3890	5810	4	4	9	2	0.222222	4.5	0.401171
33	Szillas C et al.	Tanzania	4	2000/2001	4.7	4	1345	17.4672	3890	5600	4	4	9	2	0.222222	4.5	0.364357
33	Szillas C et al.	Tanzania	4	2000/2001	4.7	4	1345	34.9345	3890	5520	4	4	9	2	0.222222	4.5	0.349969
33	Szillas C et al.	Tanzania	4	2000/2001	4.7	4	1345	52.4017	3890	5760	4	4	9	2	0.222222	4.5	0.392528
33	Szillas C et al.	Tanzania	4	2000/2001	4.7	4	1345	17.4672	3890	5300	4	4	9	2	0.222222	4.5	0.309298
33	Szillas C et al.	Tanzania	4	2000/2001	4.7	4	1345	34.9345	3890	5510	4	4	9	2	0.222222	4.5	0.348155
33	Szillas C et al.	Tanzania	4	2000/2001	4.7	4	1345	52.4017	3890	5510	4	4	9	2	0.222222	4.5	0.348155
34	Jama et al.	Kenya	3	2000	6	N/A	N/A	21.8341	2600	5180	3	3	4	1.5	0.375	2.66667	0.689294
34	Jama et al.	Kenya	3	2000	6	N/A	N/A	21.8341	2600	4000	3	3	4	1.5	0.375	2.66667	0.430783
34	Jama et al.	Kenya	3	2000	6	N/A	N/A	21.8341	2600	4110	3	3	4	1.5	0.375	2.66667	0.457912
34	Jama et al.	Kenya	3	2000	6	N/A	N/A	21.8341	2600	5830	3	3	4	1.5	0.375	2.66667	0.807506
35	Kisinyo PS et al	Kenya	3	2008-2011	4.8	2.32	1545	11.3537	527	1258	3	3	8	1.5	0.1875	5.33333	0.870078
35	Kisinyo PS et al	Kenya	3	2008-2011	4.8	2.32	1545	11.3537	527	1368	3	3	8	1.5	0.1875	5.33333	0.953905
35	Kisinyo PS et al	Kenya	3	2008-2011	4.8	2.32	1545	11.3537	527	1474	3	3	8	1.5	0.1875	5.33333	1.02853
35	Kisinyo PS et al	Kenya	3	2008-2011	4.8	2.32	1545	11.3537	527	1604	3	3	8	1.5	0.1875	5.33333	1.11306
35	Kisinyo PS et al	Kenya	3	2008-2011	4.8	2.32	1545	22.7074	527	1745	3	3	8	1.5	0.1875	5.33333	1.19731
35	Kisinyo PS et al	Kenya	3	2008-2011	4.8	2.32	1545	22.7074	527	1889	3	3	8	1.5	0.1875	5.33333	1.2766
35	Kisinyo PS et al	Kenya	3	2008-2011	4.8	2.32	1545	22.7074	527	2101	3	3	8	1.5	0.1875	5.33333	1.38297
35	Kisinyo PS et al	Kenya	3	2008-2011	4.8	2.32	1545	22.7074	527	2130	3	3	8	1.5	0.1875	5.33333	1.39668
37	NGUYEN VAN NGUU	Cameroon	3	1981	5.2	8.9	N/A	13.1004	1250	1650	3	3	4	1.5	0.375	2.66667	0.277632
37	NGUYEN VAN NGUU	Cameroon	3	1981	5.2	8.9	N/A	13.1004	1250	2830	3	3	4	1.5	0.375	2.66667	0.817133
37	NGUYEN VAN NGUU	Cameroon	3	1981	5.2	8.9	N/A	13.1004	1250	3910	3	3	4	1.5	0.375	2.66667	1.14039
37	NGUYEN VAN NGUU	Cameroon	3	1981	5.2	8.9	N/A	26.2009	1250	2440	3	3	4	1.5	0.375	2.66667	0.668854
37	NGUYEN VAN NGUU	Cameroon	3	1981	5.2	8.9	N/A	13.1004	1760	1660	3	3	4	1.5	0.375	2.66667	-0.0584962
37	NGUYEN VAN NGUU	Cameroon	3	1981	5.2	8.9	N/A	13.1004	1760	2600	3	3	4	1.5	0.375	2.66667	0.390198
37	NGUYEN VAN NGUU	Cameroon	3	1981	5.2	8.9	N/A	13.1004	1760	4450	3	3	4	1.5	0.375	2.66667	0.92759
37	NGUYEN VAN NGUU	Cameroon	3	1981	5.2	8.9	N/A	26.2009	1760	2880	3	3	4	1.5	0.375	2.66667	0.492476
37	NGUYEN VAN NGUU	Cameroon	3	1981	5.2	8.9	N/A	13.1004	1740	1840	3	3	4	1.5	0.375	2.66667	0.0558805
37	NGUYEN VAN NGUU	Cameroon	3	1981	5.2	8.9	N/A	13.1004	1740	2590	3	3	4	1.5	0.375	2.66667	0.397773
37	NGUYEN VAN NGUU	Cameroon	3	1981	5.2	8.9	N/A	13.1004	1740	2760	3	3	4	1.5	0.375	2.66667	0.461346
37	NGUYEN VAN NGUU	Cameroon	3	1981	5.2	8.9	N/A	26.2009	1740	2730	3	3	4	1.5	0.375	2.66667	0.450416
37	NGUYEN VAN NGUU	Cameroon	3	1982	5.2	8.9	N/A	13.1004	1030	1180	3	3	4	1.5	0.375	2.66667	0.135956
37	NGUYEN VAN NGUU	Cameroon	3	1982	5.2	8.9	N/A	13.1004	1030	2380	3	3	4	1.5	0.375	2.66667	0.837542
37	NGUYEN VAN NGUU	Cameroon	3	1982	5.2	8.9	N/A	13.1004	1030	3010	3	3	4	1.5	0.375	2.66667	1.07238
37	NGUYEN VAN NGUU	Cameroon	3	1982	5.2	8.9	N/A	26.2009	1030	1490	3	3	4	1.5	0.375	2.66667	0.369217
37	NGUYEN VAN NGUU	Cameroon	3	1982	5.2	8.9	N/A	13.1004	1520	1870	3	3	4	1.5	0.375	2.66667	0.207228
37	NGUYEN VAN NGUU	Cameroon	3	1982	5.2	8.9	N/A	13.1004	1520	2630	3	3	4	1.5	0.375	2.66667	0.548274
37	NGUYEN VAN NGUU	Cameroon	3	1982	5.2	8.9	N/A	13.1004	1520	2990	3	3	4	1.5	0.375	2.66667	0.676563
37	NGUYEN VAN NGUU	Cameroon	3	1982	5.2	8.9	N/A	26.2009	1520	2220	3	3	4	1.5	0.375	2.66667	0.378797
37	NGUYEN VAN NGUU	Cameroon	3	1982	5.2	8.9	N/A	13.1004	1230	1490	3	3	4	1.5	0.375	2.66667	0.191762
37	NGUYEN VAN NGUU	Cameroon	3	1982	5.2	8.9	N/A	13.1004	1230	2400	3	3	4	1.5	0.375	2.66667	0.668455
37	NGUYEN VAN NGUU	Cameroon	3	1982	5.2	8.9	N/A	13.1004	1230	2930	3	3	4	1.5	0.375	2.66667	0.867988
37	NGUYEN VAN NGUU	Cameroon	3	1982	5.2	8.9	N/A	26.2009	1230	2810	3	3	4	1.5	0.375	2.66667	0.82617
38	Omotoso Solomon Olusegun	Nigeria	3	2010/2011	4.6-4.8	4.06	1367	6.55022	1921	2321	3	3	12	1.5	0.125	8	0.189152
38	Omotoso Solomon Olusegun	Nigeria	3	2010/2011	4.6-4.8	4.06	1367	13.1004	1921	2534	3	3	12	1.5	0.125	8	0.276953
38	Omotoso Solomon Olusegun	Nigeria	3	2010/2011	4.6-4.8	4.06	1367	19.6507	1921	2106	3	3	12	1.5	0.125	8	0.0919445
38	Omotoso Solomon Olusegun	Nigeria	3	2010/2011	4.6-4.8	4.06	1367	6.55022	1921	2607	3	3	12	1.5	0.125	8	0.305354
38	Omotoso Solomon Olusegun	Nigeria	3	2010/2011	4.6-4.8	4.06	1367	13.1004	1921	2532	3	3	12	1.5	0.125	8	0.276164
38	Omotoso Solomon Olusegun	Nigeria	3	2010/2011	4.6-4.8	4.06	1367	19.6507	1921	2710	3	3	12	1.5	0.125	8	0.344103
38	Omotoso Solomon Olusegun	Nigeria	3	2010/2011	4.6-4.8	4.06	1367	6.55022	1921	2650	3	3	12	1.5	0.125	8	0.321714
38	Omotoso Solomon Olusegun	Nigeria	3	2010/2011	4.6-4.8	4.06	1367	19.6507	1921	2734	3	3	12	1.5	0.125	8	0.35292
38	Omotoso Solomon Olusegun	Nigeria	3	2010/2011	4.6-4.8	4.06	1367	26.2009	1921	2801	3	3	12	1.5	0.125	8	0.377131
38	Omotoso Solomon Olusegun	Nigeria	3	2010/2011	4.6-4.8	4.06	1367	6.55022	1921	3102	3	3	12	1.5	0.125	8	0.479201
38	Omotoso Solomon Olusegun	Nigeria	3	2010/2011	4.6-4.8	4.06	1367	19.6507	1921	3420	3	3	12	1.5	0.125	8	0.576795
38	Omotoso Solomon Olusegun	Nigeria	3	2010/2011	4.6-4.8	4.06	1367	26.2009	1921	2905	3	3	12	1.5	0.125	8	0.413588
39	Akande et al.	Nigeria	3	2000	6.1	3.24	N/A	26.2009	3000	5500	3	3	3	1.5	0.5	2	0.606136
39	Akande et al.	Nigeria	3	2000	6.1	3.24	N/A	43.6681	3000	3600	3	3	3	1.5	0.5	2	0.182322
39	Akande et al.	Nigeria	3	2000	6.1	3.24	N/A	43.6681	3000	3800	3	3	3	1.5	0.5	2	0.236389
39	Akande et al.	Nigeria	3	2001	6.1	3.24	N/A	26.2009	2500	4800	3	3	3	1.5	0.5	2	0.652325
39	Akande et al.	Nigeria	3	2001	6.1	3.24	N/A	43.6681	2500	3300	3	3	3	1.5	0.5	2	0.277632
39	Akande et al.	Nigeria	3	2001	6.1	3.24	N/A	43.6681	2500	3400	3	3	3	1.5	0.5	2	0.307485
41	Wopereis MCS	Togo	4	1999	5.5	0.015	900	6.55022	2210	3170	4	4	6	2	0.333333	3	0.360739
41	Wopereis MCS	Togo	4	1999	5.5	0.015	900	6.55022	2210	3740	4	4	6	2	0.333333	3	0.526093
41	Wopereis MCS	Togo	4	1999	5.5	0.015	900	6.55022	2210	4520	4	4	6	2	0.333333	3	0.715519
41	Wopereis MCS	Togo	4	1999	5.5	0.015	900	13.1004	2210	2540	4	4	6	2	0.333333	3	0.139172
41	Wopereis MCS	Togo	4	1999	5.5	0.015	900	13.1004	2210	3670	4	4	6	2	0.333333	3	0.507199
41	Wopereis MCS	Togo	4	1999	5.5	0.015	900	13.1004	2210	3490	4	4	6	2	0.333333	3	0.456909
41	Wopereis MCS	Togo	4	1999	5.5	0.015	900	6.55022	1220	1400	4	4	6	2	0.333333	3	0.137621
41	Wopereis MCS	Togo	4	1999	5.5	0.015	900	6.55022	1220	2740	4	4	6	2	0.333333	3	0.809107
41	Wopereis MCS	Togo	4	1999	5.5	0.015	900	6.55022	1220	3510	4	4	6	2	0.333333	3	1.05677
41	Wopereis MCS	Togo	4	1999	5.5	0.015	900	13.1004	1220	1370	4	4	6	2	0.333333	3	0.11596
41	Wopereis MCS	Togo	4	1999	5.5	0.015	900	13.1004	1220	2740	4	4	6	2	0.333333	3	0.809107
41	Wopereis MCS	Togo	4	1999	5.5	0.015	900	13.1004	1220	3490	4	4	6	2	0.333333	3	1.05105
41	Wopereis MCS	Togo	4	2000	5.5	0.015	900	6.55022	2920	3880	4	4	6	2	0.333333	3	0.284252
41	Wopereis MCS	Togo	4	2000	5.5	0.015	900	6.55022	2920	4350	4	4	6	2	0.333333	3	0.398592
41	Wopereis MCS	Togo	4	2000	5.5	0.015	900	6.55022	2920	5090	4	4	6	2	0.333333	3	0.555694
41	Wopereis MCS	Togo	4	2000	5.5	0.015	900	13.1004	2920	3630	4	4	6	2	0.333333	3	0.217649
41	Wopereis MCS	Togo	4	2000	5.5	0.015	900	13.1004	2920	4130	4	4	6	2	0.333333	3	0.346694
41	Wopereis MCS	Togo	4	2000	5.5	0.015	900	13.1004	2920	5030	4	4	6	2	0.333333	3	0.543836
41	Wopereis MCS	Togo	4	2000	5.5	0.015	900	6.55022	1140	1190	4	4	6	2	0.333333	3	0.042925
41	Wopereis MCS	Togo	4	2000	5.5	0.015	900	6.55022	1140	2870	4	4	6	2	0.333333	3	0.923284
41	Wopereis MCS	Togo	4	2000	5.5	0.015	900	6.55022	1140	3310	4	4	6	2	0.333333	3	1.06592
41	Wopereis MCS	Togo	4	2000	5.5	0.015	900	13.1004	1140	1250	4	4	6	2	0.333333	3	0.0921153
41	Wopereis MCS	Togo	4	2000	5.5	0.015	900	13.1004	1140	2580	4	4	6	2	0.333333	3	0.816761
41	Wopereis MCS	Togo	4	2000	5.5	0.015	900	13.1004	1140	3500	4	4	6	2	0.333333	3	1.12173
41	Wopereis MCS	Togo	4	2001	5.5	0.015	900	6.55022	1180	2060	4	4	6	2	0.333333	3	0.557192
41	Wopereis MCS	Togo	4	2001	5.5	0.015	900	6.55022	1180	2110	4	4	6	2	0.333333	3	0.581174
41	Wopereis MCS	Togo	4	2001	5.5	0.015	900	6.55022	1180	2590	4	4	6	2	0.333333	3	0.786143
41	Wopereis MCS	Togo	4	2001	5.5	0.015	900	13.1004	1180	2520	4	4	6	2	0.333333	3	0.758744
41	Wopereis MCS	Togo	4	2001	5.5	0.015	900	13.1004	1180	2060	4	4	6	2	0.333333	3	0.557192
41	Wopereis MCS	Togo	4	2001	5.5	0.015	900	13.1004	1180	2530	4	4	6	2	0.333333	3	0.762705
41	Wopereis MCS	Togo	4	2001	5.5	0.015	900	6.55022	280	310	4	4	5	2	0.4	2.5	0.101783
41	Wopereis MCS	Togo	4	2001	5.5	0.015	900	6.55022	280	850	4	4	5	2	0.4	2.5	1.11045
41	Wopereis MCS	Togo	4	2001	5.5	0.015	900	13.1004	280	380	4	4	5	2	0.4	2.5	0.305382
41	Wopereis MCS	Togo	4	2001	5.5	0.015	900	13.1004	280	890	4	4	5	2	0.4	2.5	1.15643
41	Wopereis MCS	Togo	4	2001	5.5	0.015	900	13.1004	280	960	4	4	5	2	0.4	2.5	1.23214
42	Mtengeti et al.	Tanzania	3	2004	5	2.9	567.3	30.8734	3000	4200	3	3	5	1.5	0.3	3.33333	0.336472
42	Mtengeti et al.	Tanzania	3	2004	5	2.9	567.3	92.5764	3000	4400	3	3	5	1.5	0.3	3.33333	0.382992
42	Mtengeti et al.	Tanzania	3	2004	5	2.9	567.3	61.7031	3000	4300	3	3	5	1.5	0.3	3.33333	0.360003
42	Mtengeti et al.	Tanzania	3	2004	5	2.9	567.3	30.8734	3000	4500	3	3	5	1.5	0.3	3.33333	0.405465
42	Mtengeti et al.	Tanzania	3	2004	5	2.9	567.3	92.5764	3000	4600	3	3	5	1.5	0.3	3.33333	0.427444
42	Mtengeti et al.	Tanzania	3	2005	5	2.9	341.5	30.8734	400	1100	3	3	5	1.5	0.3	3.33333	1.0116
42	Mtengeti et al.	Tanzania	3	2005	5	2.9	341.5	30.8734	400	1500	3	3	5	1.5	0.3	3.33333	1.32176
42	Mtengeti et al.	Tanzania	3	2005	5	2.9	341.5	61.7031	400	1700	3	3	5	1.5	0.3	3.33333	1.44692
42	Mtengeti et al.	Tanzania	3	2006	5	2.9	633.6	30.8734	400	5400	3	3	5	1.5	0.3	3.33333	2.60269
42	Mtengeti et al.	Tanzania	3	2006	5	2.9	633.6	30.8734	400	6100	3	3	5	1.5	0.3	3.33333	2.72458
45	Savini I et al.	Kenya	4	2007	5.6	1.19	1700	13.1004	1740	2452	4	4	6	2	0.333333	3	0.343019
45	Savini I et al.	Kenya	4	2007	5.6	1.19	1700	26.2009	1740	2420	4	4	6	2	0.333333	3	0.329882
45	Savini I et al.	Kenya	4	2007	5.6	1.19	1700	39.3013	1740	3550	4	4	6	2	0.333333	3	0.713062
45	Savini I et al.	Kenya	4	2007	5.6	1.19	1700	52.4017	1740	3600	4	4	6	2	0.333333	3	0.727049
45	Savini I et al.	Kenya	4	2007	5.6	1.19	1700	65.5022	1740	3020	4	4	6	2	0.333333	3	0.551372
45	Savini I et al.	Kenya	4	2007	5.6	1.19	1700	21.8341	1740	2940	4	4	6	2	0.333333	3	0.524524
45	Savini I et al.	Kenya	4	2008	5.6	1.19	1700	13.1004	2000	3820	4	4	6	2	0.333333	3	0.647103
45	Savini I et al.	Kenya	4	2008	5.6	1.19	1700	26.2009	2000	4160	4	4	6	2	0.333333	3	0.732368
45	Savini I et al.	Kenya	4	2008	5.6	1.19	1700	39.3013	2000	4730	4	4	6	2	0.333333	3	0.860778
45	Savini I et al.	Kenya	4	2008	5.6	1.19	1700	52.4017	2000	5000	4	4	6	2	0.333333	3	0.916291
45	Savini I et al.	Kenya	4	2008	5.6	1.19	1700	65.5022	2000	4270	4	4	6	2	0.333333	3	0.758467
45	Savini I et al.	Kenya	4	2008	5.6	1.19	1700	21.8341	2000	4810	4	4	6	2	0.333333	3	0.87755
45	Savini I et al.	Kenya	4	2009	5.6	1.19	1700	13.1004	2212.5	3885	4	4	6	2	0.333333	3	0.563
45	Savini I et al.	Kenya	4	2009	5.6	1.19	1700	26.2009	2212.5	4280	4	4	6	2	0.333333	3	0.65983
45	Savini I et al.	Kenya	4	2009	5.6	1.19	1700	39.3013	2212.5	5460	4	4	6	2	0.333333	3	0.903326
45	Savini I et al.	Kenya	4	2009	5.6	1.19	1700	52.4017	2212.5	5940	4	4	6	2	0.333333	3	0.987586
45	Savini I et al.	Kenya	4	2009	5.6	1.19	1700	65.5022	2212.5	5670	4	4	6	2	0.333333	3	0.941066
45	Savini I et al.	Kenya	4	2009	5.6	1.19	1700	21.8341	2212.5	5210	4	4	6	2	0.333333	3	0.856457
45	Savini I et al.	Kenya	4	2010	5.6	1.19	1700	13.1004	2220	4270	4	4	6	2	0.333333	3	0.654107
45	Savini I et al.	Kenya	4	2010	5.6	1.19	1700	26.2009	2220	5090	4	4	6	2	0.333333	3	0.829771
45	Savini I et al.	Kenya	4	2010	5.6	1.19	1700	39.3013	2220	5930	4	4	6	2	0.333333	3	0.982517
45	Savini I et al.	Kenya	4	2010	5.6	1.19	1700	52.4017	2220	6070	4	4	6	2	0.333333	3	1.00585
45	Savini I et al.	Kenya	4	2010	5.6	1.19	1700	65.5022	2220	6270	4	4	6	2	0.333333	3	1.03827
45	Savini I et al.	Kenya	4	2010	5.6	1.19	1700	87.3362	2220	5540	4	4	6	2	0.333333	3	0.914487
45	Savini I et al.	Kenya	4	2011	5.6	1.19	1700	13.1004	2520	5020	4	4	6	2	0.333333	3	0.689171
45	Savini I et al.	Kenya	4	2011	5.6	1.19	1700	26.2009	2520	6120	4	4	6	2	0.333333	3	0.887303
45	Savini I et al.	Kenya	4	2011	5.6	1.19	1700	39.3013	2520	7330	4	4	6	2	0.333333	3	1.06772
45	Savini I et al.	Kenya	4	2011	5.6	1.19	1700	52.4017	2520	6500	4	4	6	2	0.333333	3	0.947543
45	Savini I et al.	Kenya	4	2011	5.6	1.19	1700	65.5022	2520	6490	4	4	6	2	0.333333	3	0.946004
45	Savini I et al.	Kenya	4	2011	5.6	1.19	1700	21.8341	2520	6880	4	4	6	2	0.333333	3	1.00436
45	Savini I et al.	Kenya	4	2007	5.6	1.19	1700	13.1004	1830	2210	4	4	6	2	0.333333	3	0.188677
45	Savini I et al.	Kenya	4	2007	5.6	1.19	1700	26.2009	1830	2320	4	4	6	2	0.333333	3	0.237251
45	Savini I et al.	Kenya	4	2007	5.6	1.19	1700	39.3013	1830	3290	4	4	6	2	0.333333	3	0.586572
45	Savini I et al.	Kenya	4	2007	5.6	1.19	1700	52.4017	1830	3450	4	4	6	2	0.333333	3	0.634058
45	Savini I et al.	Kenya	4	2007	5.6	1.19	1700	65.5022	1830	3790	4	4	6	2	0.333333	3	0.72805
45	Savini I et al.	Kenya	4	2007	5.6	1.19	1700	21.8341	1830	3800	4	4	6	2	0.333333	3	0.730685
45	Savini I et al.	Kenya	4	2008	5.6	1.19	1700	13.1004	980	2420	4	4	6	2	0.333333	3	0.90397
45	Savini I et al.	Kenya	4	2008	5.6	1.19	1700	26.2009	980	2665	4	4	6	2	0.333333	3	1.00041
45	Savini I et al.	Kenya	4	2008	5.6	1.19	1700	39.3013	980	2605	4	4	6	2	0.333333	3	0.977635
45	Savini I et al.	Kenya	4	2008	5.6	1.19	1700	52.4017	980	2945	4	4	6	2	0.333333	3	1.10031
45	Savini I et al.	Kenya	4	2008	5.6	1.19	1700	65.5022	980	2037.5	4	4	6	2	0.333333	3	0.731926
45	Savini I et al.	Kenya	4	2008	5.6	1.19	1700	21.8341	980	2862.5	4	4	6	2	0.333333	3	1.0719
45	Savini I et al.	Kenya	4	2009	5.6	1.19	1700	13.1004	1600	4220	4	4	6	2	0.333333	3	0.969831
45	Savini I et al.	Kenya	4	2009	5.6	1.19	1700	26.2009	1600	5560	4	4	6	2	0.333333	3	1.24559
45	Savini I et al.	Kenya	4	2009	5.6	1.19	1700	39.3013	1600	6080	4	4	6	2	0.333333	3	1.335
45	Savini I et al.	Kenya	4	2009	5.6	1.19	1700	52.4017	1600	6110	4	4	6	2	0.333333	3	1.33992
45	Savini I et al.	Kenya	4	2009	5.6	1.19	1700	65.5022	1600	6110	4	4	6	2	0.333333	3	1.33992
45	Savini I et al.	Kenya	4	2009	5.6	1.19	1700	21.8341	1600	6540	4	4	6	2	0.333333	3	1.40793
45	Savini I et al.	Kenya	4	2010	5.6	1.19	1700	13.1004	1970	3520	4	4	6	2	0.333333	3	0.580427
45	Savini I et al.	Kenya	4	2010	5.6	1.19	1700	26.2009	1970	4770	4	4	6	2	0.333333	3	0.884313
45	Savini I et al.	Kenya	4	2010	5.6	1.19	1700	39.3013	1970	4840	4	4	6	2	0.333333	3	0.898881
45	Savini I et al.	Kenya	4	2010	5.6	1.19	1700	52.4017	1970	4670	4	4	6	2	0.333333	3	0.863126
45	Savini I et al.	Kenya	4	2010	5.6	1.19	1700	65.5022	1970	5210	4	4	6	2	0.333333	3	0.972546
45	Savini I et al.	Kenya	4	2010	5.6	1.19	1700	21.8341	1970	4820	4	4	6	2	0.333333	3	0.89474
45	Savini I et al.	Kenya	4	2011	5.6	1.19	1700	13.1004	2250	4730	4	4	6	2	0.333333	3	0.742995
45	Savini I et al.	Kenya	4	2011	5.6	1.19	1700	26.2009	2250	4730	4	4	6	2	0.333333	3	0.742995
45	Savini I et al.	Kenya	4	2011	5.6	1.19	1700	39.3013	2250	5850	4	4	6	2	0.333333	3	0.955511
45	Savini I et al.	Kenya	4	2011	5.6	1.19	1700	52.4017	2250	5620	4	4	6	2	0.333333	3	0.915401
45	Savini I et al.	Kenya	4	2011	5.6	1.19	1700	65.5022	2250	5940	4	4	6	2	0.333333	3	0.970779
45	Savini I et al.	Kenya	4	2011	5.6	1.19	1700	21.8341	2250	6120	4	4	6	2	0.333333	3	1.00063
46	Nyambati et al.	Kenya	4	2007	5.4	3.9	N/A	21.8341	950	3470	4	4	2	2	1	1	1.29545
46	Nyambati et al.	Kenya	4	2007	5.4	3.9	N/A	21.8341	950	3220	4	4	2	2	1	1	1.22067
46	Nyambati et al.	Kenya	4	2007	5.4	3.9	N/A	21.8341	430	1580	4	4	2	2	1	1	1.30139
46	Nyambati et al.	Kenya	4	2007	5.4	3.9	N/A	21.8341	430	1630	4	4	2	2	1	1	1.33255
46	Nyambati et al.	Kenya	4	2008	5.2	4.4	N/A	21.8341	1130	3810	4	4	4	2	0.5	2	1.21541
46	Nyambati et al.	Kenya	4	2008	5.2	4.4	N/A	21.8341	1130	3740	4	4	4	2	0.5	2	1.19687
46	Nyambati et al.	Kenya	4	2008	5.2	4.4	N/A	21.8341	1130	4000	4	4	4	2	0.5	2	1.26408
46	Nyambati et al.	Kenya	4	2008	5.2	4.4	N/A	21.8341	1130	3912	4	4	4	2	0.5	2	1.24183
40	Akande et al.	Nigeria	3	2000	6.1	5.8	N/A	8.73362	2800	3912	3	3	9	1.5	0.166667	6	0.334429
40	Akande et al.	Nigeria	3	2000	6.1	5.8	N/A	17.4672	2800	5200	3	3	9	1.5	0.166667	6	0.619039
40	Akande et al.	Nigeria	3	2000	6.1	5.8	N/A	26.2009	2800	5300	3	3	9	1.5	0.166667	6	0.638087
40	Akande et al.	Nigeria	3	2000	6.1	5.8	N/A	8.73362	2800	5400	3	3	9	1.5	0.166667	6	0.65678
40	Akande et al.	Nigeria	3	2000	6.1	5.8	N/A	17.4672	2800	4000	3	3	9	1.5	0.166667	6	0.356675
40	Akande et al.	Nigeria	3	2000	6.1	5.8	N/A	26.2009	2800	4400	3	3	9	1.5	0.166667	6	0.451985
40	Akande et al.	Nigeria	3	2000	6.1	5.8	N/A	8.73362	2800	4800	3	3	9	1.5	0.166667	6	0.538997
40	Akande et al.	Nigeria	3	2000	6.1	5.8	N/A	17.4672	2800	5000	3	3	9	1.5	0.166667	6	0.579818
40	Akande et al.	Nigeria	3	2000	6.1	5.8	N/A	26.2009	2800	4600	3	3	9	1.5	0.166667	6	0.496437
40	Akande et al.	Nigeria	3	2000	6.1	5.8	N/A	8.73362	2800	4700	3	3	9	1.5	0.166667	6	0.517943
40	Akande et al.	Nigeria	3	2000	6.1	5.8	N/A	17.4672	3300	5100	3	3	9	1.5	0.166667	6	0.435318
40	Akande et al.	Nigeria	3	2000	6.1	5.8	N/A	26.2009	3300	5800	3	3	9	1.5	0.166667	6	0.563935
40	Akande et al.	Nigeria	3	2000	6.1	5.8	N/A	8.73362	3300	5100	3	3	9	1.5	0.166667	6	0.435318
40	Akande et al.	Nigeria	3	2000	6.1	5.8	N/A	17.4672	3300	4200	3	3	9	1.5	0.166667	6	0.241162
40	Akande et al.	Nigeria	3	2000	6.1	5.8	N/A	26.2009	3300	4000	3	3	9	1.5	0.166667	6	0.192372
40	Akande et al.	Nigeria	3	2000	6.1	5.8	N/A	8.73362	3300	4000	3	3	9	1.5	0.166667	6	0.192372
40	Akande et al.	Nigeria	3	2000	6.1	5.8	N/A	17.4672	3300	5000	3	3	9	1.5	0.166667	6	0.415515
40	Akande et al.	Nigeria	3	2000	6.1	5.8	N/A	26.2009	3300	4200	3	3	9	1.5	0.166667	6	0.241162
40	Akande et al.	Nigeria	3	2000	6.1	5.8	N/A	8.73362	3300	4800	3	3	9	1.5	0.166667	6	0.374693
40	Akande et al.	Nigeria	3	2000	6.1	5.8	N/A	17.4672	1000	1400	3	3	9	1.5	0.166667	6	0.336472
40	Akande et al.	Nigeria	3	2000	6.1	5.8	N/A	26.2009	1000	2900	3	3	9	1.5	0.166667	6	1.06471
40	Akande et al.	Nigeria	3	2000	6.1	5.8	N/A	8.73362	1000	2890	3	3	9	1.5	0.166667	6	1.06126
40	Akande et al.	Nigeria	3	2000	6.1	5.8	N/A	17.4672	1000	2700	3	3	9	1.5	0.166667	6	0.993252
40	Akande et al.	Nigeria	3	2000	6.1	5.8	N/A	26.2009	1000	2746	3	3	9	1.5	0.166667	6	1.01015
40	Akande et al.	Nigeria	3	2000	6.1	5.8	N/A	8.73362	1000	2654	3	3	9	1.5	0.166667	6	0.976068
40	Akande et al.	Nigeria	3	2000	6.1	5.8	N/A	17.4672	1000	2100	3	3	9	1.5	0.166667	6	0.741937
40	Akande et al.	Nigeria	3	2000	6.1	5.8	N/A	26.2009	1000	2600	3	3	9	1.5	0.166667	6	0.955511
40	Akande et al.	Nigeria	3	2000	6.1	5.8	N/A	8.73362	1000	2400	3	3	9	1.5	0.166667	6	0.875469
40	Akande et al.	Nigeria	3	2000	6.1	5.8	N/A	17.4672	1800	3600	3	3	9	1.5	0.166667	6	0.693147
40	Akande et al.	Nigeria	3	2000	6.1	5.8	N/A	26.2009	1800	3800	3	3	9	1.5	0.166667	6	0.747214
40	Akande et al.	Nigeria	3	2000	6.1	5.8	N/A	8.73362	1800	3000	3	3	9	1.5	0.166667	6	0.510826
40	Akande et al.	Nigeria	3	2000	6.1	5.8	N/A	17.4672	1800	3300	3	3	9	1.5	0.166667	6	0.606136
40	Akande et al.	Nigeria	3	2000	6.1	5.8	N/A	26.2009	1800	2900	3	3	9	1.5	0.166667	6	0.476924
40	Akande et al.	Nigeria	3	2000	6.1	5.8	N/A	8.73362	1800	2900	3	3	9	1.5	0.166667	6	0.476924
40	Akande et al.	Nigeria	3	2000	6.1	5.8	N/A	17.4672	1800	2900	3	3	9	1.5	0.166667	6	0.476924
40	Akande et al.	Nigeria	3	2000	6.1	5.8	N/A	26.2009	1800	3100	3	3	9	1.5	0.166667	6	0.543615
40	Akande et al.	Nigeria	3	2001	6.1	5.8	N/A	8.73362	1800	3300	3	3	9	1.5	0.166667	6	0.606136
40	Akande et al.	Nigeria	3	2001	6.1	5.8	N/A	17.4672	3300	5000	3	3	9	1.5	0.166667	6	0.415515
40	Akande et al.	Nigeria	3	2001	6.1	5.8	N/A	26.2009	3300	5300	3	3	9	1.5	0.166667	6	0.473784
40	Akande et al.	Nigeria	3	2001	6.1	5.8	N/A	8.73362	3300	5500	3	3	9	1.5	0.166667	6	0.510826
40	Akande et al.	Nigeria	3	2001	6.1	5.8	N/A	17.4672	3300	4300	3	3	9	1.5	0.166667	6	0.264693
40	Akande et al.	Nigeria	3	2001	6.1	5.8	N/A	26.2009	3300	4800	3	3	9	1.5	0.166667	6	0.374693
40	Akande et al.	Nigeria	3	2001	6.1	5.8	N/A	8.73362	3300	5000	3	3	9	1.5	0.166667	6	0.415515
40	Akande et al.	Nigeria	3	2001	6.1	5.8	N/A	17.4672	3300	4200	3	3	9	1.5	0.166667	6	0.241162
40	Akande et al.	Nigeria	3	2001	6.1	5.8	N/A	26.2009	3300	4400	3	3	9	1.5	0.166667	6	0.287682
40	Akande et al.	Nigeria	3	2001	6.1	5.8	N/A	8.73362	3300	4500	3	3	9	1.5	0.166667	6	0.310155
40	Akande et al.	Nigeria	3	2001	6.1	5.8	N/A	17.4672	4000	5100	3	3	9	1.5	0.166667	6	0.242946
40	Akande et al.	Nigeria	3	2001	6.1	5.8	N/A	26.2009	4000	5200	3	3	9	1.5	0.166667	6	0.262364
40	Akande et al.	Nigeria	3	2001	6.1	5.8	N/A	8.73362	4000	5300	3	3	9	1.5	0.166667	6	0.281412
40	Akande et al.	Nigeria	3	2001	6.1	5.8	N/A	17.4672	4000	5000	3	3	9	1.5	0.166667	6	0.223144
40	Akande et al.	Nigeria	3	2001	6.1	5.8	N/A	26.2009	4000	5200	3	3	9	1.5	0.166667	6	0.262364
40	Akande et al.	Nigeria	3	2001	6.1	5.8	N/A	8.73362	4000	5500	3	3	9	1.5	0.166667	6	0.318454
40	Akande et al.	Nigeria	3	2001	6.1	5.8	N/A	17.4672	4000	5200	3	3	9	1.5	0.166667	6	0.262364
40	Akande et al.	Nigeria	3	2001	6.1	5.8	N/A	26.2009	4000	4400	3	3	9	1.5	0.166667	6	0.0953102
40	Akande et al.	Nigeria	3	2001	6.1	5.8	N/A	8.73362	4000	5400	3	3	9	1.5	0.166667	6	0.300105
40	Akande et al.	Nigeria	3	2001	6.1	5.8	N/A	17.4672	600	1400	3	3	9	1.5	0.166667	6	0.847298
40	Akande et al.	Nigeria	3	2001	6.1	5.8	N/A	26.2009	600	1700	3	3	9	1.5	0.166667	6	1.04145
40	Akande et al.	Nigeria	3	2001	6.1	5.8	N/A	8.73362	600	1600	3	3	9	1.5	0.166667	6	0.980829
40	Akande et al.	Nigeria	3	2001	6.1	5.8	N/A	17.4672	600	1700	3	3	9	1.5	0.166667	6	1.04145
40	Akande et al.	Nigeria	3	2001	6.1	5.8	N/A	26.2009	600	1600	3	3	9	1.5	0.166667	6	0.980829
40	Akande et al.	Nigeria	3	2001	6.1	5.8	N/A	8.73362	600	1700	3	3	9	1.5	0.166667	6	1.04145
40	Akande et al.	Nigeria	3	2001	6.1	5.8	N/A	17.4672	600	900	3	3	9	1.5	0.166667	6	0.405465
40	Akande et al.	Nigeria	3	2001	6.1	5.8	N/A	26.2009	600	1000	3	3	9	1.5	0.166667	6	0.510826
40	Akande et al.	Nigeria	3	2001	6.1	5.8	N/A	8.73362	600	900	3	3	9	1.5	0.166667	6	0.405465
40	Akande et al.	Nigeria	3	2001	6.1	5.8	N/A	17.4672	1500	2600	3	3	9	1.5	0.166667	6	0.550046
40	Akande et al.	Nigeria	3	2001	6.1	5.8	N/A	26.2009	1500	2200	3	3	9	1.5	0.166667	6	0.382992
40	Akande et al.	Nigeria	3	2001	6.1	5.8	N/A	8.73362	1500	2200	3	3	9	1.5	0.166667	6	0.382992
40	Akande et al.	Nigeria	3	2001	6.1	5.8	N/A	17.4672	1500	2500	3	3	9	1.5	0.166667	6	0.510826
40	Akande et al.	Nigeria	3	2001	6.1	5.8	N/A	26.2009	1500	2600	3	3	9	1.5	0.166667	6	0.550046
40	Akande et al.	Nigeria	3	2001	6.1	5.8	N/A	8.73362	1500	2600	3	3	9	1.5	0.166667	6	0.550046
40	Akande et al.	Nigeria	3	2001	6.1	5.8	N/A	17.4672	1500	2400	3	3	9	1.5	0.166667	6	0.470004
40	Akande et al.	Nigeria	3	2001	6.1	5.8	N/A	26.2009	1500	2400	3	3	9	1.5	0.166667	6	0.470004
40	Akande et al.	Nigeria	3	2001	6.1	5.8	N/A	8.73362	1500	2500	3	3	9	1.5	0.166667	6	0.510826
40	Akande et al.	Nigeria	3	2001	6.1	5.8	N/A	17.4672	3500	5300	3	3	9	1.5	0.166667	6	0.414944
40	Akande et al.	Nigeria	3	2001	6.1	5.8	N/A	26.2009	3500	5600	3	3	9	1.5	0.166667	6	0.470004
40	Akande et al.	Nigeria	3	2001	6.1	5.8	N/A	8.73362	3500	5800	3	3	9	1.5	0.166667	6	0.505095
40	Akande et al.	Nigeria	3	2001	6.1	5.8	N/A	17.4672	3500	4500	3	3	9	1.5	0.166667	6	0.251314
40	Akande et al.	Nigeria	3	2001	6.1	5.8	N/A	26.2009	3500	5200	3	3	9	1.5	0.166667	6	0.395896
40	Akande et al.	Nigeria	3	2001	6.1	5.8	N/A	8.73362	3500	5200	3	3	9	1.5	0.166667	6	0.395896
40	Akande et al.	Nigeria	3	2001	6.1	5.8	N/A	17.4672	3500	4600	3	3	9	1.5	0.166667	6	0.273293
40	Akande et al.	Nigeria	3	2001	6.1	5.8	N/A	26.2009	3500	4800	3	3	9	1.5	0.166667	6	0.315853
40	Akande et al.	Nigeria	3	2001	6.1	5.8	N/A	17.4672	3500	4900	3	3	9	1.5	0.166667	6	0.336472
40	Akande et al.	Nigeria	3	2001	6.1	5.8	N/A	26.2009	4100	5700	3	3	6	1.5	0.25	4	0.329479
40	Akande et al.	Nigeria	3	2001	6.1	5.8	N/A	8.73362	4100	5800	3	3	6	1.5	0.25	4	0.346871
40	Akande et al.	Nigeria	3	2001	6.1	5.8	N/A	17.4672	4100	5300	3	3	6	1.5	0.25	4	0.25672
40	Akande et al.	Nigeria	3	2001	6.1	5.8	N/A	26.2009	4100	5600	3	3	6	1.5	0.25	4	0.31178
40	Akande et al.	Nigeria	3	2001	6.1	5.8	N/A	17.4672	4100	5900	3	3	6	1.5	0.25	4	0.363965
40	Akande et al.	Nigeria	3	2001	6.1	5.8	N/A	26.2009	4100	4900	3	3	6	1.5	0.25	4	0.178248
48	Ndungu etal	Kenya	4	2000	4.89	1.18	1530	8.73362	1800	2000	4	4	3	2	0.666667	1.5	0.105361
48	Ndungu etal	Kenya	4	2000	4.89	1.18	1530	17.4672	1800	1800	4	4	3	2	0.666667	1.5	0
48	Ndungu etal	Kenya	4	2000	4.89	1.18	1530	26.2009	1800	1800	4	4	3	2	0.666667	1.5	0
48	Ndungu etal	Kenya	4	2001	4.89	1.18	1530	8.73362	1900	2500	4	4	3	2	0.666667	1.5	0.274437
48	Ndungu etal	Kenya	4	2001	4.89	1.18	1530	17.4672	1900	3900	4	4	3	2	0.666667	1.5	0.719123
48	Ndungu etal	Kenya	4	2001	4.89	1.18	1530	26.2009	1900	4300	4	4	3	2	0.666667	1.5	0.816761
48	Ndungu etal	Kenya	4	2001	4.89	1.18	1530	8.73362	1100	1100	4	4	3	2	0.666667	1.5	0
48	Ndungu etal	Kenya	4	2001	4.89	1.18	1530	17.4672	1100	1500	4	4	3	2	0.666667	1.5	0.310155
48	Ndungu etal	Kenya	4	2001	4.89	1.18	1530	26.2009	1100	1800	4	4	3	2	0.666667	1.5	0.492476
48	Ndungu etal	Kenya	4	2002	4.89	1.18	1530	17.4672	900	2900	4	4	3	2	0.666667	1.5	1.17007
48	Ndungu etal	Kenya	4	2002	4.89	1.18	1530	26.2009	900	1900	4	4	3	2	0.666667	1.5	0.747214
48	Ndungu etal	Kenya	4	2002	4.89	1.18	1530	8.73362	600	1000	4	4	3	2	0.666667	1.5	0.510826
48	Ndungu etal	Kenya	4	2002	4.89	1.18	1530	17.4672	600	2800	4	4	3	2	0.666667	1.5	1.54045
48	Ndungu etal	Kenya	4	2002	4.89	1.18	1530	26.2009	600	2300	4	4	3	2	0.666667	1.5	1.34373
49	Nouri Maman et al.	Mali	3	2014	5.38	12.4	1139	26.2009	3260	2650	3	3	4	1.5	0.375	2.66667	-0.207168
49	Nouri Maman et al.	Mali	3	2014	5.38	12.4	1139	26.2009	3260	2980	3	3	4	1.5	0.375	2.66667	-0.0898039
49	Nouri Maman et al.	Mali	3	2014	5.38	12.4	1139	26.2009	3260	4980	3	3	4	1.5	0.375	2.66667	0.423703
49	Nouri Maman et al.	Mali	3	2014	5.38	12.4	1139	26.2009	3260	5860	3	3	4	1.5	0.375	2.66667	0.586422
49	Nouri Maman et al.	Mali	3	2014	5.38	12.4	1139	26.2009	5110	4940	3	3	4	1.5	0.375	2.66667	-0.0338341
49	Nouri Maman et al.	Mali	3	2014	5.38	12.4	1139	26.2009	5110	4830	3	3	4	1.5	0.375	2.66667	-0.0563529
49	Nouri Maman et al.	Mali	3	2014	5.38	12.4	1139	26.2009	5110	4980	3	3	4	1.5	0.375	2.66667	-0.0257695
49	Nouri Maman et al.	Mali	3	2014	5.38	12.4	1139	26.2009	5110	4630	3	3	4	1.5	0.375	2.66667	-0.0986425
49	Nouri Maman et al.	Mali	3	2015	5.36	12.4	1392	26.2009	2790	3390	3	3	4	1.5	0.375	2.66667	0.194788
49	Nouri Maman et al.	Mali	3	2015	5.36	12.4	1392	26.2009	2790	2790	3	3	4	1.5	0.375	2.66667	0
49	Nouri Maman et al.	Mali	3	2015	5.36	12.4	1392	26.2009	2790	3160	3	3	4	1.5	0.375	2.66667	0.12453
49	Nouri Maman et al.	Mali	3	2015	5.36	12.4	1392	26.2009	2790	4110	3	3	4	1.5	0.375	2.66667	0.387381
49	Nouri Maman et al.	Mali	3	2015	5.36	12.4	1392	26.2009	4140	3320	3	3	4	1.5	0.375	2.66667	-0.220731
49	Nouri Maman et al.	Mali	3	2015	5.36	12.4	1392	26.2009	4140	4320	3	3	4	1.5	0.375	2.66667	0.0425596
49	Nouri Maman et al.	Mali	3	2015	5.36	12.4	1392	26.2009	4140	4820	3	3	4	1.5	0.375	2.66667	0.152078
49	Nouri Maman et al.	Mali	3	2015	5.36	12.4	1392	26.2009	4140	4490	3	3	4	1.5	0.375	2.66667	0.0811569
49	Nouri Maman et al.	Mali	3	2014	6.19	15.9	567	26.2009	2110	2640	3	3	4	1.5	0.375	2.66667	0.224091
49	Nouri Maman et al.	Mali	3	2014	6.19	15.9	567	26.2009	2110	2210	3	3	4	1.5	0.375	2.66667	0.0463046
49	Nouri Maman et al.	Mali	3	2014	6.19	15.9	567	26.2009	2110	3580	3	3	4	1.5	0.375	2.66667	0.528675
49	Nouri Maman et al.	Mali	3	2014	6.19	15.9	567	26.2009	3140	2970	3	3	4	1.5	0.375	2.66667	-0.0556608
49	Nouri Maman et al.	Mali	3	2014	6.19	15.9	567	26.2009	3140	3040	3	3	4	1.5	0.375	2.66667	-0.0323653
49	Nouri Maman et al.	Mali	3	2014	6.19	15.9	567	26.2009	3140	3820	3	3	4	1.5	0.375	2.66667	0.196028
49	Nouri Maman et al.	Mali	3	2015	5.4	12.8	668	26.2009	1350	1590	3	3	4	1.5	0.375	2.66667	0.163629
49	Nouri Maman et al.	Mali	3	2015	5.4	12.8	668	26.2009	1350	1380	3	3	4	1.5	0.375	2.66667	0.0219789
49	Nouri Maman et al.	Mali	3	2015	5.4	12.8	668	26.2009	1350	2270	3	3	4	1.5	0.375	2.66667	0.519675
49	Nouri Maman et al.	Mali	3	2015	5.4	12.8	668	26.2009	1350	1570	3	3	4	1.5	0.375	2.66667	0.150971
49	Nouri Maman et al.	Mali	3	2015	5.4	12.8	668	26.2009	3180	4030	3	3	4	1.5	0.375	2.66667	0.236885
49	Nouri Maman et al.	Mali	3	2015	5.4	12.8	668	26.2009	3180	3600	3	3	4	1.5	0.375	2.66667	0.124053
49	Nouri Maman et al.	Mali	3	2015	5.4	12.8	668	26.2009	3180	4380	3	3	4	1.5	0.375	2.66667	0.320168
49	Nouri Maman et al.	Mali	3	2015	5.4	12.8	668	26.2009	3180	2980	3	3	4	1.5	0.375	2.66667	-0.0649579
49	Nouri Maman et al.	Mali	3	2014	5.8	16.5	898	26.2009	2760	3720	3	3	4	1.5	0.375	2.66667	0.298493
49	Nouri Maman et al.	Mali	3	2014	5.8	16.5	898	26.2009	2760	3380	3	3	4	1.5	0.375	2.66667	0.202645
49	Nouri Maman et al.	Mali	3	2014	5.8	16.5	898	26.2009	2760	3860	3	3	4	1.5	0.375	2.66667	0.335437
49	Nouri Maman et al.	Mali	3	2014	5.8	16.5	898	26.2009	2760	4010	3	3	4	1.5	0.375	2.66667	0.373561
49	Nouri Maman et al.	Mali	3	2014	5.8	16.5	898	26.2009	4290	4190	3	3	4	1.5	0.375	2.66667	-0.023586
49	Nouri Maman et al.	Mali	3	2014	5.8	16.5	898	26.2009	4290	4290	3	3	4	1.5	0.375	2.66667	0
49	Nouri Maman et al.	Mali	3	2014	5.8	16.5	898	26.2009	4290	3880	3	3	4	1.5	0.375	2.66667	-0.100452
49	Nouri Maman et al.	Mali	3	2014	5.8	16.5	898	26.2009	4290	4400	3	3	4	1.5	0.375	2.66667	0.0253178
49	Nouri Maman et al.	Mali	3	2015	5.7	16.5	1139	26.2009	4280	4460	3	3	4	1.5	0.375	2.66667	0.0411958
49	Nouri Maman et al.	Mali	3	2015	5.7	16.5	1139	26.2009	4280	4480	3	3	4	1.5	0.375	2.66667	0.04567
49	Nouri Maman et al.	Mali	3	2015	5.7	16.5	1139	26.2009	4280	5560	3	3	4	1.5	0.375	2.66667	0.261645
49	Nouri Maman et al.	Mali	3	2015	5.7	16.5	1139	26.2009	4280	4080	3	3	4	1.5	0.375	2.66667	-0.047856
49	Nouri Maman et al.	Mali	3	2015	5.7	16.5	1139	26.2009	5600	5040	3	3	4	1.5	0.375	2.66667	-0.105361
49	Nouri Maman et al.	Mali	3	2015	5.7	16.5	1139	26.2009	5600	5760	3	3	4	1.5	0.375	2.66667	0.0281709
49	Nouri Maman et al.	Mali	3	2015	5.7	16.5	1139	26.2009	5600	6250	3	3	4	1.5	0.375	2.66667	0.109815
49	Nouri Maman et al.	Mali	3	2015	5.7	16.5	1139	26.2009	5600	5910	3	3	4	1.5	0.375	2.66667	0.0538792
52	Okande MCS et al.	Nigeria	3	1989	5.3	4.85	N/A	10.917	5310	5420	3	3	4	1.5	0.375	2.66667	0.020504
52	Okande MCS et al.	Nigeria	3	1989	5.3	4.85	N/A	21.8341	5310	5790	3	3	4	1.5	0.375	2.66667	0.0865405
52	Okande MCS et al.	Nigeria	3	1989	5.3	4.85	N/A	43.6681	5310	5570	3	3	4	1.5	0.375	2.66667	0.0478032
52	Okande MCS et al.	Nigeria	3	1989	5.3	4.85	N/A	87.3362	5310	5370	3	3	4	1.5	0.375	2.66667	0.0112361
52	Okande MCS et al.	Nigeria	3	1989	5.3	4.85	N/A	10.917	5340	5050	3	3	4	1.5	0.375	2.66667	-0.0558374
52	Okande MCS et al.	Nigeria	3	1989	5.3	4.85	N/A	21.8341	5340	4890	3	3	4	1.5	0.375	2.66667	-0.0880333
52	Okande MCS et al.	Nigeria	3	1989	5.3	4.85	N/A	43.6681	5340	6470	3	3	4	1.5	0.375	2.66667	0.19195
52	Okande MCS et al.	Nigeria	3	1989	5.3	4.85	N/A	87.3362	5340	7120	3	3	4	1.5	0.375	2.66667	0.287682
52	Okande MCS et al.	Nigeria	3	1990	5.3	4.85	N/A	10.917	4270	3900	3	3	4	1.5	0.375	2.66667	-0.0906373
52	Okande MCS et al.	Nigeria	3	1990	5.3	4.85	N/A	21.8341	4270	4920	3	3	4	1.5	0.375	2.66667	0.141695
52	Okande MCS et al.	Nigeria	3	1990	5.3	4.85	N/A	43.6681	4270	4970	3	3	4	1.5	0.375	2.66667	0.151806
52	Okande MCS et al.	Nigeria	3	1990	5.3	4.85	N/A	87.3362	4270	4760	3	3	4	1.5	0.375	2.66667	0.108634
52	Okande MCS et al.	Nigeria	3	1990	5.3	4.85	N/A	10.917	4210	4480	3	3	4	1.5	0.375	2.66667	0.0621604
52	Okande MCS et al.	Nigeria	3	1990	5.3	4.85	N/A	21.8341	4210	4660	3	3	4	1.5	0.375	2.66667	0.101553
52	Okande MCS et al.	Nigeria	3	1990	5.3	4.85	N/A	43.6681	4210	4530	3	3	4	1.5	0.375	2.66667	0.0732593
52	Okande MCS et al.	Nigeria	3	1990	5.3	4.85	N/A	87.3362	4210	4450	3	3	4	1.5	0.375	2.66667	0.0554414
54	Generose Nziguheba	Kenya	4	1995	5.4	2.5	1800	4.36681	1300	1800	4	4	2	2	1	1	0.325422
54	Generose Nziguheba	Kenya	4	1995	5.4	2.5	1800	10.917	1300	2500	4	4	2	2	1	1	0.653926
54	Generose Nziguheba	Kenya	4	1996	5.4	2.5	1800	4.36681	700	1400	4	4	4	2	0.5	2	0.693147
54	Generose Nziguheba	Kenya	4	1996	5.4	2.5	1800	10.917	700	1800	4	4	4	2	0.5	2	0.944462
54	Generose Nziguheba	Kenya	4	1997	5.4	2.5	1800	4.36681	700	1200	4	4	4	2	0.5	2	0.538997
54	Generose Nziguheba	Kenya	4	1997	5.4	2.5	1800	10.917	700	1800	4	4	4	2	0.5	2	0.944462
54	Generose Nziguheba	Kenya	4	1998	5.4	2.5	1800	4.36681	2800	5100	4	4	2	2	1	1	0.599621
54	Generose Nziguheba	Kenya	4	2000	5.4	2.5	1800	4.36681	1000	3900	4	4	2	2	1	1	1.36098
55	Bationo A	Mali	3	1989	4.85	5.48	N/A	9.60699	1014	1539	3	3	3	1.5	0.5	2	0.41723
55	Bationo A	Mali	3	1989	4.85	5.48	N/A	11.7904	1014	1261	3	3	3	1.5	0.5	2	0.218002
55	Bationo A	Mali	3	1989	4.85	5.48	N/A	35.8079	1014	1406	3	3	3	1.5	0.5	2	0.326846
55	Bationo A	Mali	3	1990	4.85	5.48	N/A	9.60699	1178	1372	3	3	3	1.5	0.5	2	0.152451
55	Bationo A	Mali	3	1990	4.85	5.48	N/A	11.7904	1178	1533	3	3	3	1.5	0.5	2	0.263409
55	Bationo A	Mali	3	1991	4.85	5.48	N/A	9.60699	1043	1347	3	3	3	1.5	0.5	2	0.255779
55	Bationo A	Mali	3	1991	4.85	5.48	N/A	35.8079	1043	1222	3	3	3	1.5	0.5	2	0.158388
55	Bationo A	Mali	3	1992	4.85	5.48	N/A	9.60699	670	1318	3	3	3	1.5	0.5	2	0.676593
55	Bationo A	Mali	3	1992	4.85	5.48	N/A	11.7904	670	1189	3	3	3	1.5	0.5	2	0.57359
56	Ikerra et al	Tanzania	3	2001	4.8	6.4	750-1000	34.9345	1340	1870	3	3	2	1.5	0.75	1.33333	0.333269
56	Ikerra et al	Tanzania	3	2001	4.8	6.4	750-1000	34.9345	1340	2500	3	3	2	1.5	0.75	1.33333	0.623621
56	Ikerra et al	Tanzania	3	2002	4.8	6.4	750-1000	34.9345	870	2210	3	3	2	1.5	0.75	1.33333	0.932255
56	Ikerra et al	Tanzania	3	2002	4.8	6.4	750-1000	34.9345	870	1810	3	3	2	1.5	0.75	1.33333	0.732589
58	Abaidoo RC et al.	Nigreria	3	2003	6.5	15	1200	6.55022	700	1110	3	3	3	1.5	0.5	2	0.461035
58	Abaidoo RC et al.	Nigreria	3	2003	6.5	15	1200	39.3013	700	1260	3	3	3	1.5	0.5	2	0.587787
58	Abaidoo RC et al.	Nigreria	3	2003	6.5	15	1200	13.1004	700	1018	3	3	3	1.5	0.5	2	0.374515
58	Abaidoo RC et al.	Nigreria	3	2003	6.5	15	1200	6.55022	1219	1807	3	3	3	1.5	0.5	2	0.393637
58	Abaidoo RC et al.	Nigreria	3	2003	6.5	15	1200	39.3013	1219	1593	3	3	3	1.5	0.5	2	0.267588
58	Abaidoo RC et al.	Nigreria	3	2003	6.5	15	1200	13.1004	1219	1522	3	3	3	1.5	0.5	2	0.221994
58	Abaidoo RC et al.	Nigreria	3	2003	6.5	15	1200	6.55022	1116	1204	3	3	3	1.5	0.5	2	0.0758985
58	Abaidoo RC et al.	Nigreria	3	2003	6.5	15	1200	39.3013	1116	972	3	3	3	1.5	0.5	2	-0.13815
58	Abaidoo RC et al.	Nigreria	3	2003	6.5	15	1200	13.1004	1116	1539	3	3	3	1.5	0.5	2	0.321382
58	Abaidoo RC et al.	Nigreria	3	2003	6.5	15	1200	6.55022	1100	1261	3	3	3	1.5	0.5	2	0.136595
58	Abaidoo RC et al.	Nigreria	3	2003	6.5	15	1200	39.3013	1100	1406	3	3	3	1.5	0.5	2	0.245439
58	Abaidoo RC et al.	Nigreria	3	2003	6.5	15	1200	13.1004	1100	1372	3	3	3	1.5	0.5	2	0.220959
58	Abaidoo RC et al.	Nigreria	3	2003	6.5	15	1200	6.55022	1217	1533	3	3	3	1.5	0.5	2	0.230838
58	Abaidoo RC et al.	Nigreria	3	2003	6.5	15	1200	39.3013	1217	1347	3	3	3	1.5	0.5	2	0.101491
58	Abaidoo RC et al.	Nigreria	3	2003	6.5	15	1200	13.1004	1217	1222	3	3	3	1.5	0.5	2	0.00410005
58	Abaidoo RC et al.	Nigreria	3	2003	6.5	15	1200	6.55022	808	1318	3	3	3	1.5	0.5	2	0.489309
58	Abaidoo RC et al.	Nigreria	3	2003	6.5	15	1200	39.3013	808	1189	3	3	3	1.5	0.5	2	0.386306
58	Abaidoo RC et al.	Nigreria	3	2003	6.5	15	1200	13.1004	808	1210	3	3	3	1.5	0.5	2	0.403814
58	Abaidoo RC et al.	Nigreria	3	2003	6.5	15	1200	6.55022	875	1116	3	3	3	1.5	0.5	2	0.243282
58	Abaidoo RC et al.	Nigreria	3	2003	6.5	15	1200	39.3013	875	1146	3	3	3	1.5	0.5	2	0.269809
58	Abaidoo RC et al.	Nigreria	3	2003	6.5	15	1200	13.1004	875	1249	3	3	3	1.5	0.5	2	0.355875
58	Abaidoo RC et al.	Nigreria	3	2003	6.5	15	1200	6.55022	1253	1683	3	3	3	1.5	0.5	2	0.295037
58	Abaidoo RC et al.	Nigreria	3	2003	6.5	15	1200	39.3013	1253	1410	3	3	3	1.5	0.5	2	0.118049
58	Abaidoo RC et al.	Nigreria	3	2003	6.5	15	1200	13.1004	1253	2934	3	3	3	1.5	0.5	2	0.850826
58	Abaidoo RC et al.	Nigreria	3	2003	6.5	22.6	1100	6.55022	729	940	3	3	3	1.5	0.5	2	0.254206
58	Abaidoo RC et al.	Nigreria	3	2003	6.5	22.6	1100	39.3013	729	1063	3	3	3	1.5	0.5	2	0.377177
58	Abaidoo RC et al.	Nigreria	3	2003	6.5	22.6	1100	13.1004	729	1136	3	3	3	1.5	0.5	2	0.443595
58	Abaidoo RC et al.	Nigreria	3	2003	6.5	22.6	1100	6.55022	1669	3004	3	3	3	1.5	0.5	2	0.58772
58	Abaidoo RC et al.	Nigreria	3	2003	6.5	22.6	1100	39.3013	1669	2110	3	3	3	1.5	0.5	2	0.234463
58	Abaidoo RC et al.	Nigreria	3	2003	6.5	22.6	1100	13.1004	1669	2115	3	3	3	1.5	0.5	2	0.23683
58	Abaidoo RC et al.	Nigreria	3	2003	6.5	22.6	1100	6.55022	1025	2503	3	3	3	1.5	0.5	2	0.892797
58	Abaidoo RC et al.	Nigreria	3	2003	6.5	22.6	1100	39.3013	1025	1795	3	3	3	1.5	0.5	2	0.560312
58	Abaidoo RC et al.	Nigreria	3	2003	6.5	22.6	1100	13.1004	1025	1820	3	3	3	1.5	0.5	2	0.574144
58	Abaidoo RC et al.	Nigreria	3	2003	6.5	22.6	1100	6.55022	1063	2501	3	3	3	1.5	0.5	2	0.855596
58	Abaidoo RC et al.	Nigreria	3	2003	6.5	22.6	1100	39.3013	1063	2271	3	3	3	1.5	0.5	2	0.759125
58	Abaidoo RC et al.	Nigreria	3	2003	6.5	22.6	1100	13.1004	1063	2265	3	3	3	1.5	0.5	2	0.75648
58	Abaidoo RC et al.	Nigreria	3	2003	6.5	22.6	1100	6.55022	909	2649	3	3	3	1.5	0.5	2	1.06959
58	Abaidoo RC et al.	Nigreria	3	2003	6.5	22.6	1100	39.3013	909	1668	3	3	3	1.5	0.5	2	0.607035
58	Abaidoo RC et al.	Nigreria	3	2003	6.5	22.6	1100	13.1004	909	2265	3	3	3	1.5	0.5	2	0.912985
58	Abaidoo RC et al.	Nigreria	3	2003	6.5	22.6	1100	6.55022	587	1820	3	3	3	1.5	0.5	2	1.13157
58	Abaidoo RC et al.	Nigreria	3	2003	6.5	22.6	1100	39.3013	587	1850	3	3	3	1.5	0.5	2	1.14792
58	Abaidoo RC et al.	Nigreria	3	2003	6.5	22.6	1100	13.1004	587	2057	3	3	3	1.5	0.5	2	1.25398
58	Abaidoo RC et al.	Nigreria	3	2003	6.5	22.6	1100	6.55022	717	2041	3	3	3	1.5	0.5	2	1.04612
58	Abaidoo RC et al.	Nigreria	3	2003	6.5	22.6	1100	39.3013	717	1778	3	3	3	1.5	0.5	2	0.908169
58	Abaidoo RC et al.	Nigreria	3	2003	6.5	22.6	1100	13.1004	717	1807	3	3	3	1.5	0.5	2	0.924347
58	Abaidoo RC et al.	Nigreria	3	2003	6.5	22.6	1100	6.55022	975	2171	3	3	3	1.5	0.5	2	0.800506
58	Abaidoo RC et al.	Nigreria	3	2003	6.5	22.6	1100	39.3013	975	1744	3	3	3	1.5	0.5	2	0.581499
58	Abaidoo RC et al.	Nigreria	3	2003	6.5	22.6	1100	13.1004	975	2298	3	3	3	1.5	0.5	2	0.857357
58	Abaidoo RC et al.	Nigreria	3	2003	6.5	22.6	1100	6.55022	756	1982	3	3	3	1.5	0.5	2	0.96382
58	Abaidoo RC et al.	Nigreria	3	2003	6.5	22.6	1100	39.3013	756	2171	3	3	3	1.5	0.5	2	1.0549
58	Abaidoo RC et al.	Nigreria	3	2003	6.5	22.6	1100	13.1004	756	2013	3	3	3	1.5	0.5	2	0.97934
58	Abaidoo RC et al.	Nigreria	3	2003	6.5	22.6	1100	6.55022	449	1544	3	3	3	1.5	0.5	2	1.23511
58	Abaidoo RC et al.	Nigreria	3	2003	6.5	22.6	1100	39.3013	449	1632	3	3	3	1.5	0.5	2	1.29054
58	Abaidoo RC et al.	Nigreria	3	2003	6.5	22.6	1100	13.1004	449	1442	3	3	3	1.5	0.5	2	1.16676
58	Abaidoo RC et al.	Nigreria	3	2003	5.5	37.7	1000	6.55022	3120	3152	3	3	3	1.5	0.5	2	0.0102042
58	Abaidoo RC et al.	Nigreria	3	2003	5.5	37.7	1000	39.3013	3120	2839	3	3	3	1.5	0.5	2	-0.0943811
58	Abaidoo RC et al.	Nigreria	3	2003	5.5	37.7	1000	13.1004	3120	3721	3	3	3	1.5	0.5	2	0.176159
58	Abaidoo RC et al.	Nigreria	3	2003	5.5	37.7	1000	6.55022	2547	3051	3	3	3	1.5	0.5	2	0.180553
58	Abaidoo RC et al.	Nigreria	3	2003	5.5	37.7	1000	39.3013	2547	3067	3	3	3	1.5	0.5	2	0.185784
58	Abaidoo RC et al.	Nigreria	3	2003	5.5	37.7	1000	13.1004	2547	3082	3	3	3	1.5	0.5	2	0.190663
58	Abaidoo RC et al.	Nigreria	3	2003	5.5	37.7	1000	6.55022	1978	2310	3	3	3	1.5	0.5	2	0.155161
58	Abaidoo RC et al.	Nigreria	3	2003	5.5	37.7	1000	39.3013	1978	2419	3	3	3	1.5	0.5	2	0.201268
58	Abaidoo RC et al.	Nigreria	3	2003	5.5	37.7	1000	13.1004	1978	2885	3	3	3	1.5	0.5	2	0.377439
58	Abaidoo RC et al.	Nigreria	3	2003	5.5	37.7	1000	6.55022	2906	3166	3	3	3	1.5	0.5	2	0.0856914
58	Abaidoo RC et al.	Nigreria	3	2003	5.5	37.7	1000	39.3013	2906	3527	3	3	3	1.5	0.5	2	0.19367
58	Abaidoo RC et al.	Nigreria	3	2003	5.5	37.7	1000	13.1004	2906	3315	3	3	3	1.5	0.5	2	0.13168
58	Abaidoo RC et al.	Nigreria	3	2003	5.5	37.7	1000	6.55022	2515	3396	3	3	3	1.5	0.5	2	0.300325
58	Abaidoo RC et al.	Nigreria	3	2003	5.5	37.7	1000	39.3013	2515	2850	3	3	3	1.5	0.5	2	0.125046
58	Abaidoo RC et al.	Nigreria	3	2003	5.5	37.7	1000	13.1004	2515	3348	3	3	3	1.5	0.5	2	0.28609
58	Abaidoo RC et al.	Nigreria	3	2003	5.5	37.7	1000	6.55022	2428	3167	3	3	3	1.5	0.5	2	0.265717
58	Abaidoo RC et al.	Nigreria	3	2003	5.5	37.7	1000	39.3013	2428	2684	3	3	3	1.5	0.5	2	0.10024
58	Abaidoo RC et al.	Nigreria	3	2003	5.5	37.7	1000	13.1004	2428	2873	3	3	3	1.5	0.5	2	0.168289
58	Abaidoo RC et al.	Nigreria	3	2003	5.5	37.7	1000	6.55022	2507	3800	3	3	3	1.5	0.5	2	0.415914
58	Abaidoo RC et al.	Nigreria	3	2003	5.5	37.7	1000	39.3013	2507	3502	3	3	3	1.5	0.5	2	0.334247
58	Abaidoo RC et al.	Nigreria	3	2003	5.5	37.7	1000	13.1004	2507	3525	3	3	3	1.5	0.5	2	0.340794
58	Abaidoo RC et al.	Nigreria	3	2003	5.5	37.7	1000	6.55022	2394	3332	3	3	3	1.5	0.5	2	0.330607
58	Abaidoo RC et al.	Nigreria	3	2003	5.5	37.7	1000	39.3013	2394	3478	3	3	3	1.5	0.5	2	0.373492
58	Abaidoo RC et al.	Nigreria	3	2003	5.5	37.7	1000	13.1004	2394	3525	3	3	3	1.5	0.5	2	0.386915
58	Abaidoo RC et al.	Nigreria	3	2003	5.5	37.7	1000	6.55022	2646	4068	3	3	3	1.5	0.5	2	0.430102
58	Abaidoo RC et al.	Nigreria	3	2003	5.5	37.7	1000	39.3013	2646	3267	3	3	3	1.5	0.5	2	0.210823
58	Abaidoo RC et al.	Nigreria	3	2003	5.5	37.7	1000	13.1004	2646	3637	3	3	3	1.5	0.5	2	0.31811
59	Adetunj RC	Nigeria	4	1990	5.6	4.8	1483	13.1004	1450	2440	4	4	9	2	0.222222	4.5	0.520434
59	Adetunj RC	Nigeria	4	1990	5.6	4.8	1483	19.6507	1450	2970	4	4	9	2	0.222222	4.5	0.716998
59	Adetunj RC	Nigeria	4	1990	5.6	4.8	1483	32.7511	1450	3040	4	4	9	2	0.222222	4.5	0.740294
59	Adetunj RC	Nigeria	4	1990	5.6	4.8	1483	13.1004	1450	2280	4	4	9	2	0.222222	4.5	0.452612
59	Adetunj RC	Nigeria	4	1990	5.6	4.8	1483	19.6507	1450	2840	4	4	9	2	0.222222	4.5	0.67224
59	Adetunj RC	Nigeria	4	1990	5.6	4.8	1483	32.7511	1450	2880	4	4	9	2	0.222222	4.5	0.686227
59	Adetunj RC	Nigeria	4	1990	5.6	4.8	1483	13.1004	1450	3100	4	4	9	2	0.222222	4.5	0.759839
59	Adetunj RC	Nigeria	4	1990	5.6	4.8	1483	19.6507	1450	3900	4	4	9	2	0.222222	4.5	0.989413
59	Adetunj RC	Nigeria	4	1990	5.6	4.8	1483	32.7511	1450	4100	4	4	9	2	0.222222	4.5	1.03942
59	Adetunj RC	Nigeria	4	1991	5.6	4.8	1483	13.1004	960	2650	4	4	8	2	0.25	4	1.01538
59	Adetunj RC	Nigeria	4	1991	5.6	4.8	1483	19.6507	960	2330	4	4	8	2	0.25	4	0.88669
59	Adetunj RC	Nigeria	4	1991	5.6	4.8	1483	32.7511	960	2520	4	4	8	2	0.25	4	0.965081
59	Adetunj RC	Nigeria	4	1991	5.6	4.8	1483	13.1004	960	2460	4	4	8	2	0.25	4	0.940983
59	Adetunj RC	Nigeria	4	1991	5.6	4.8	1483	19.6507	960	2480	4	4	8	2	0.25	4	0.949081
59	Adetunj RC	Nigeria	4	1991	5.6	4.8	1483	32.7511	960	2560	4	4	8	2	0.25	4	0.980829
59	Adetunj RC	Nigeria	4	1991	5.6	4.8	1483	13.1004	960	2500	4	4	8	2	0.25	4	0.957113
59	Adetunj RC	Nigeria	4	1991	5.6	4.8	1483	19.6507	960	2580	4	4	8	2	0.25	4	0.988611
59	Adetunj RC	Nigeria	4	1991	5.6	4.8	1483	32.7511	960	2590	4	4	8	2	0.25	4	0.99248
59	Adetunj RC	Nigeria	4	1992	5.6	4.8	1483	13.1004	880	2100	4	4	8	2	0.25	4	0.869771
59	Adetunj RC	Nigeria	4	1992	5.6	4.8	1483	19.6507	880	2750	4	4	8	2	0.25	4	1.13943
59	Adetunj RC	Nigeria	4	1992	5.6	4.8	1483	32.7511	880	2380	4	4	8	2	0.25	4	0.994934
59	Adetunj RC	Nigeria	4	1992	5.6	4.8	1483	13.1004	880	2560	4	4	8	2	0.25	4	1.06784
59	Adetunj RC	Nigeria	4	1992	5.6	4.8	1483	19.6507	880	2500	4	4	8	2	0.25	4	1.04412
59	Adetunj RC	Nigeria	4	1992	5.6	4.8	1483	32.7511	880	2600	4	4	8	2	0.25	4	1.08334
59	Adetunj RC	Nigeria	4	1992	5.6	4.8	1483	13.1004	880	2500	4	4	8	2	0.25	4	1.04412
59	Adetunj RC	Nigeria	4	1992	5.6	4.8	1483	19.6507	880	2540	4	4	8	2	0.25	4	1.06
59	Adetunj RC	Nigeria	4	1992	5.6	4.8	1483	32.7511	880	2500	4	4	8	2	0.25	4	1.04412
60	Ezikiel Akinkunmi Akinrinde	Nigeria	3	1998/1999	5.63	N/A	1200-1400	43.6681	2500	3300	3	3	3	1.5	0.5	2	0.277632
60	Ezikiel Akinkunmi Akinrinde	Nigeria	3	1998/2000	5.6	N/A	1200-1401	43.6681	2500	3500	3	3	3	1.5	0.5	2	0.336472
60	Ezikiel Akinkunmi Akinrinde	Nigeria	3	1998/2001	5.6	N/A	1200-1402	43.6681	2500	3000	3	3	3	1.5	0.5	2	0.182322
60	Ezikiel Akinkunmi Akinrinde	Nigeria	3	1998/2002	5.6	N/A	800-1100	43.6681	1250	2800	3	3	3	1.5	0.5	2	0.806476
60	Ezikiel Akinkunmi Akinrinde	Nigeria	3	1998/2003	5.6	N/A	800-1101	43.6681	1250	2250	3	3	3	1.5	0.5	2	0.587787
60	Ezikiel Akinkunmi Akinrinde	Nigeria	3	1998/2004	5.6	N/A	800-1102	43.6681	1250	3000	3	3	3	1.5	0.5	2	0.875469
60	Ezikiel Akinkunmi Akinrinde	Nigeria	3	1998/2005	5.8	N/A	600-800	43.6681	1200	2800	3	3	3	1.5	0.5	2	0.847298
60	Ezikiel Akinkunmi Akinrinde	Nigeria	3	1998/2006	5.8	N/A	600-801	43.6681	1200	3200	3	3	3	1.5	0.5	2	0.980829
60	Ezikiel Akinkunmi Akinrinde	Nigeria	3	1998/2007	5.8	N/A	600-802	43.6681	1200	4600	3	3	3	1.5	0.5	2	1.34373
61	Sunday Amhakhia et al	Nigeria	3	2007	N/A	N/A	1560	8.73362	2230	5000	3	3	6	1.5	0.25	4	0.807436
61	Sunday Amhakhia et al	Nigeria	3	2007	N/A	N/A	1560	17.4672	2230	4900	3	3	6	1.5	0.25	4	0.787234
61	Sunday Amhakhia et al	Nigeria	3	2007	N/A	N/A	1560	26.2009	2230	5940	3	3	6	1.5	0.25	4	0.979708
61	Sunday Amhakhia et al	Nigeria	3	2007	N/A	N/A	1560	34.9345	2230	5940	3	3	6	1.5	0.25	4	0.979708
61	Sunday Amhakhia et al	Nigeria	3	2007	N/A	N/A	1560	43.6681	2230	6090	3	3	6	1.5	0.25	4	1.00465
61	Sunday Amhakhia et al	Nigeria	3	2007	N/A	N/A	1560	52.4017	2230	5500	3	3	6	1.5	0.25	4	0.902747
61	Sunday Amhakhia et al	Nigeria	3	2008	N/A	N/A	1560	8.73362	890	2410	3	3	6	1.5	0.25	4	0.996161
61	Sunday Amhakhia et al	Nigeria	3	2008	N/A	N/A	1560	17.4672	890	2630	3	3	6	1.5	0.25	4	1.08352
61	Sunday Amhakhia et al	Nigeria	3	2008	N/A	N/A	1560	26.2009	890	2380	3	3	6	1.5	0.25	4	0.983634
61	Sunday Amhakhia et al	Nigeria	3	2008	N/A	N/A	1560	34.9345	890	2880	3	3	6	1.5	0.25	4	1.17432
61	Sunday Amhakhia et al	Nigeria	3	2008	N/A	N/A	1560	43.6681	890	3930	3	3	6	1.5	0.25	4	1.48517

## Sheet: Sheet1
			Africa	2.66667	0.825207
			Africa	2.66667	0.385662
			Africa	2.66667	1.13708
			Africa	2.66667	1.10253
			Africa	2.66667	1.03609
			Africa	2.66667	1.13266
			Africa	2.66667	1.78524
			Africa	2.66667	1.89452
			Africa	2	1.55424
			Africa	2	1.63503
			Africa	2	1.75081
			Africa	2	2.00585
			Africa	2	1.97633
			Africa	2	2.26542
			Africa	4	1.21173
			Africa	4	0.506466
			Africa	4	0.752953
			Africa	4	0.614726
			Africa	4	0.582383
			Africa	4	0.534853
			Africa	1.5	0.760821
			Africa	1.5	0.841586
			Africa	1.5	1.01092
			Africa	1.5	0.367562
			Africa	1.5	0.641861
			Africa	1.5	0.699
			Africa	6	0.39895
			Africa	6	0.508225
			Africa	6	0.50627
			Africa	6	0.587065
			Africa	6	0.70284
			Africa	6	0.579818
			Africa	6	0.550296
			Africa	6	0.839382
			Africa	6	0.673474
			Africa	2.66667	0.506466
			Africa	2.66667	0.752953
			Africa	2.66667	0.614726
			Africa	2.66667	0.582383
			Africa	2.66667	0.530302
			Africa	2.66667	0.760821
			Africa	2.66667	0.841586
			Africa	2.66667	1.01092
			Africa	2.66667	0.367562
			Africa	2.66667	0.641861
			Africa	2.66667	0.699
			Africa	2.66667	0.80843
			Africa	2.66667	0.486619
			Africa	2.66667	0.565312
			Africa	2.66667	0.61914
			Africa	2.66667	0.765547
			Africa	2.66667	0.532272
			Africa	2.66667	0.24177
			Africa	2.66667	0.380817
			Africa	2.66667	0.448563
			Africa	2	0.571786
			Africa	2	0.681653
			Africa	2	0.836629
			Africa	2	0.71295
			Africa	2	0.474028
			Africa	2	0.752633
			Africa	2	0.686675
			Africa	2	0.724896
			Africa	1.33333	0.0262024
			Africa	1.33333	0.256219
			Africa	5.33333	1.15868
			Africa	5.33333	1.17792
			Africa	5.33333	1.24594
			Africa	5.33333	-0.00166806
			Africa	5.33333	0.0760788
			Africa	5.33333	0.145954
			Africa	5.33333	0.440342
			Africa	5.33333	0.472471
			Africa	2	0.0941133
			Africa	2	0.107004
			Africa	2	0.0931148
			Africa	2	0.07903
			Africa	2	0.399761
			Africa	2	0.0499272
			Africa	2	0.196162
			Africa	2	0.303764
			Africa	2	0.142289
			Africa	2	0.235249
			Africa	2	0.216899
			Africa	2	0.0830568
			Africa	2	-0.103318
			Africa	2	-0.294659
			Africa	2	-0.0554997
			Africa	2	0.149054
			Africa	2	0.19862
			Africa	2	0.307899
			Africa	2	0.468242
			Africa	2	0.529799
			Africa	2	0.36546
			Africa	2	0.620295
			Africa	2	0.270376
			Africa	2	0.562413
			Africa	2	0.282111
			Africa	2	0.412845
			Africa	2	0.506371
			Africa	2	0.248017
			Africa	2	0.556319
			Africa	2	0.538997
			Africa	2	0.638696
			Africa	1.5	0.592639
			Africa	1.5	0.196061
			Africa	1.5	0.245965
			Africa	1.5	0.258325
			Africa	1.5	0.163098
			Africa	1.5	0.238261
			Africa	1.5	0.260835
			Africa	2	0.502092
			Africa	2	0.602175
			Africa	2	0.714653
			Africa	2	0.287682
			Africa	2	0.882389
			Africa	2	0.847298
			Africa	2	0.332706
			Africa	2	0.387766
			Africa	2	0.552069
			Africa	2	0.906721
			Africa	2	0.716678
			Africa	2	0.847298
			Africa	2	0.197826
			Africa	2	0.677399
			Africa	2	0.611802
			Africa	2	0.693147
			Africa	2	0.587787
			Africa	2	0.470004
			Africa	2	0.494019
			Africa	2	0.650588
			Africa	2	0.590868
			Africa	2	0.0425596
			Africa	2	0.434038
			Africa	2	0.330242
			Africa	2	0.559616
			Africa	2	0.661398
			Africa	2	0.723919
			Africa	2	0.593064
			Africa	2	0.389465
			Africa	2	0.451985
			Africa	2	0.767255
			Africa	2	0.653926
			Africa	2	0.693147
			Africa	2	0.526093
			Africa	2	0.802346
			Africa	2	1.17272
			Africa	2.66667	0.14274
			Africa	2.66667	0.186375
			Africa	2.66667	0.219527
			Africa	2.66667	0.239614
			Africa	2.66667	0.22083
			Africa	2.66667	0.308613
			Africa	2.66667	0.314073
			Africa	2.66667	0.0753585
			Africa	2.66667	0.246753
			Africa	2.66667	0.0605845
			Africa	2.66667	0.073352
			Africa	2.66667	0.145827
			Africa	2.66667	0.0204919
			Africa	2.66667	0.254013
			Africa	2.66667	0.347166
			Africa	2.66667	0.339472
			Africa	2.66667	0.0742939
			Africa	2.66667	0.341295
			Africa	2.66667	0.498712
			Africa	5.33333	0.640114
			Africa	5.33333	0.682507
			Africa	5.33333	0.919841
			Africa	5.33333	1.0224
			Africa	5.33333	1.21114
			Africa	5.33333	1.25843
			Africa	5.33333	1.28455
			Africa	5.33333	1.26562
			Africa	5.33333	0.731578
			Africa	5.33333	0.725275
			Africa	5.33333	0.880199
			Africa	5.33333	0.96437
			Africa	5.33333	1.16595
			Africa	5.33333	1.22712
			Africa	5.33333	1.27203
			Africa	5.33333	1.29299
			Africa	5.33333	0.616203
			Africa	5.33333	0.612661
			Africa	5.33333	0.88841
			Africa	5.33333	0.923141
			Africa	5.33333	1.11243
			Africa	5.33333	1.18755
			Africa	5.33333	1.22886
			Africa	5.33333	1.19054
			Africa	5.33333	0.899648
			Africa	5.33333	0.392436
			Africa	5.33333	1.15561
			Africa	5.33333	1.18684
			Africa	5.33333	1.28147
			Africa	5.33333	1.40642
			Africa	5.33333	1.06307
			Africa	5.33333	0.803578
			Africa	5.33333	0.85414
			Africa	5.33333	1.08538
			Africa	5.33333	1.10557
			Africa	5.33333	1.11572
			Africa	5.33333	1.10761
			Africa	5.33333	0.698696
			Africa	5.33333	0.637157
			Africa	5.33333	0.872417
			Africa	5.33333	0.875734
			Africa	5.33333	1.22045
			Africa	5.33333	1.27055
			Africa	5.33333	1.29588
			Africa	5.33333	1.27522
			Africa	5.33333	1.43383
			Africa	5.33333	0.627018
			Africa	5.33333	0.935501
			Africa	5.33333	1.04024
			Africa	5.33333	1.20532
			Africa	5.33333	1.27655
			Africa	5.33333	1.26607
			Africa	5.33333	1.28714
			Africa	3.33333	0.83933
			Africa	3.33333	0.883966
			Africa	3.33333	1.06839
			Africa	3.33333	1.1437
			Africa	3.33333	1.17916
			Africa	4	0.343019
			Africa	4	0.329882
			Africa	4	0.713062
			Africa	4	0.727049
			Africa	4	0.551372
			Africa	4	0.524524
			Africa	4	0.647103
			Africa	4	0.732368
			Africa	4	0.860778
			Africa	4	0.916291
			Africa	4	0.758467
			Africa	4	0.87755
			Africa	4	0.56413
			Africa	4	0.66096
			Africa	4	0.904456
			Africa	4	0.988717
			Africa	4	0.942197
			Africa	4	0.857587
			Africa	4	0.654107
			Africa	4	0.829771
			Africa	4	0.982517
			Africa	4	1.00585
			Africa	4	1.03827
			Africa	4	0.914487
			Africa	4	0.689171
			Africa	4	0.887303
			Africa	4	1.06772
			Africa	4	0.947543
			Africa	4	0.946004
			Africa	4	1.00436
			Africa	4	0.561955
			Africa	4	0.595649
			Africa	4	0.586572
			Africa	4	0.634058
			Africa	4	0.72805
			Africa	4	0.730685
			Africa	4	0.91302
			Africa	4	1.00041
			Africa	4	0.977635
			Africa	4	1.10031
			Africa	4	0.731926
			Africa	4	1.0719
			Africa	4	0.969831
			Africa	4	1.24559
			Africa	4	1.335
			Africa	4	1.33992
			Africa	4	1.33992
			Africa	4	1.40793
			Africa	4	0.580427
			Africa	4	0.884313
			Africa	4	0.898881
			Africa	4	0.863126
			Africa	4	0.972546
			Africa	4	0.89474
			Africa	4	0.742995
			Africa	4	0.742995
			Africa	4	0.955511
			Africa	4	0.915401
			Africa	4	0.970779
			Africa	4	1.00063
			Africa	2	0.481257
			Africa	2	0.511469
			Africa	2	0.342559
			Africa	2	0.265259
			Africa	2	1.32928
			Africa	2	1.077
			Africa	2	0.710609
			Africa	2	0.555037
			Africa	2	0.58899
			Africa	2	0.65475
			Africa	2	0.236474
			Africa	2	0.0991518
			Africa	2	0.318682
			Africa	2	0.0486706
			Africa	2	0.482733
			Africa	2	0.178455
			Africa	2	0.269218
			Africa	2	0.10133
			Africa	2	0.140095
			Africa	2	0.189576
			Africa	2	0.223603
			Africa	2	0.203483
			Africa	2	0.313658
			Africa	2	0.74444
			Africa	2	0.74444
			Africa	2	0.543615
			Africa	2	0.405465
			Africa	2	0.510826
			Africa	2	0.613104
			Africa	2	0.613104
			Africa	2	0.990399
			Africa	2	0.268264
			Africa	2	-0.0800427
			Africa	2	0.405465
			Africa	2	0.313658
			Africa	2	0.456758
			Africa	2	0.146603
			Africa	2	0.318454
			Africa	5.33333	0.405465
			Africa	5.33333	0.362905
			Africa	5.33333	0.661398
			Africa	5.33333	0.81093
			Africa	5.33333	0.594707
			Africa	5.33333	0.693147
			Africa	5.33333	0.940983
			Africa	2.66667	0.737502
			Africa	2.66667	1.06995
			Africa	2.66667	0.885026
			Africa	2.66667	1.03412
			Africa	2.66667	1.05856
			Africa	2.66667	1.32735
			Africa	2.66667	1.4201
			Africa	2.66667	1.3883
			Africa	2.66667	0.844429
			Africa	2.66667	1.03335
			Africa	2.66667	1.05925
			Africa	2.66667	1.21663
			Africa	2.66667	0.247519
			Africa	2.66667	0.350062
			Africa	2.66667	0.57581
			Africa	2.66667	0.638945
			Africa	2.66667	0.527983
			Africa	2.66667	0.586244
			Africa	2.66667	0.915233
			Africa	2.66667	0.671785
			Africa	2.66667	0.497619
			Africa	2.66667	0.796065
			Africa	2.66667	1.15234
			Africa	2.66667	0.78189
			Africa	2.66667	0.766026
			Africa	2.66667	0.861436
			Africa	2.66667	1.13771
			Africa	2.66667	0.934507
			Africa	2.66667	1.02431
			Africa	2.66667	1.44719
			Africa	2.66667	1.19195
			Africa	2.66667	1.34222
			Africa	2.66667	1.26842
			Africa	1.5	0.0913743
			Africa	1.5	0.354821
			Africa	1.5	0.465363
			Africa	1.5	0.81575
			Africa	1.5	1.04273
			Africa	1.5	1.19852
			Africa	1.5	0.170907
			Africa	1.5	0.583396
			Africa	1.5	0.716177
			Africa	2	0.174158
			Africa	1.6	0.260882
			Africa	1.33333	0.112189
			Africa	1.14286	0.186942
			Africa	1	0.369128
			Africa	0.888889	0.399031
			Africa	0.8	0.348278
			Africa	0.727273	0.360737
			Africa	0.666667	0.37702
			Africa	0.615385	0.417902
			Africa	0.571429	0.358236
			Africa	0.533333	0.359193
			Africa	2.66667	0.266188
			Africa	2.66667	0.375263
			Africa	2.66667	0.273154
			Africa	2.66667	0.290452
			Africa	2	-0.00389712
			Africa	2	0.179227
			Africa	2	0.0285022
			Africa	2	0.000118294
			Africa	2	0.0291464
			Africa	2	0.00366063
			Africa	2	-0.0362852
			Africa	2	0.0310641
			Africa	2	0.285266
			Africa	2	0.600194
			Africa	2	0.602575
			Africa	2	0.193457
			Africa	2	-0.0259194
			Africa	2	0.442716
			Africa	2	0.120386
			Africa	2	0.304945
			Africa	2	0.350679
			Africa	2	0.322342
			Africa	2	-0.00203597
			Africa	2	0.104818
			Africa	2	-0.0658501
			Africa	2	0.0519071
			Africa	2	0.230052
			Africa	2	-0.082323
			Africa	2	-0.0249138
			Africa	2	0.0856627
			Africa	2	0.0609986
			Africa	2	0.102844
			Africa	2	0.262686
			Africa	2	0.19822
			Africa	2	0.180561
			Africa	2	-0.0275094
			Africa	2	-0.0869989
			Africa	2	0.202675
			Africa	2	0.20051
			Africa	2	0.195985
			Africa	2	1.15775
			Africa	2	1.29691
			Africa	2	0.59852
			Africa	2	0.667012
			Africa	2	0.597268
			Africa	2	0.450308
			Africa	2	0.683889
			Africa	2	0.514078
			Africa	2	0.191103
			Africa	2	0.0685199
			Africa	2	0.203642
			Africa	2	-0.022076
			Africa	2	0.146008
			Africa	2	0.331469
			Africa	2	0.55273
			Africa	2	-0.012739
			Africa	2	0.24071
			Africa	2	0.384142
			Africa	2	0.554176
			Africa	2	0.195309
			Africa	2	1.03102
			Africa	2	0.480945
			Africa	2	0.0632099
			Africa	2	0.214916
			Africa	2	0.293734
			Africa	2.66667	0.841557
			Africa	2.66667	1.05812
			Africa	2.66667	0.780933
			Africa	2	0.478058
			Africa	2	0.376542
			Africa	2	0.670413
			Africa	2	0.535603
			Africa	2	0.780933
			Africa	2	1.05812
			Africa	1.5	0.295449
			Africa	1.5	0.167615
			Africa	1.5	0.165368
			Africa	1.5	0.455743
			Africa	1.5	0.396902
			Africa	1.5	0.406277
			Africa	1.5	1.00164
			Africa	1.5	0.861877
			Africa	1.5	0.870611
			Africa	1.5	0.747078
			Africa	1.5	0.449227
			Africa	1.5	0.481838
			Africa	1.5	0.678987
			Africa	1.5	0.586799
			Africa	1.5	0.547634
			Africa	1.5	0.755936
			Africa	1.5	0.546171
			Africa	1.5	0.512382
			Africa	1.5	0.322338
			Africa	1.5	0.292904
			Africa	1.5	0.286681
			Africa	1.5	0.0429349
			Africa	1.5	0.7495
			Africa	1.5	0.761461
			Africa	4.5	0.0961439
			Africa	4.5	0.307215
			Africa	4.5	-0.0508106
			Africa	4.5	-0.0527429
			Africa	4.5	-0.0297974
			Africa	4.5	0.0691152
			Africa	4.5	-0.191538
			Africa	4.5	0.00731265
			Africa	4.5	0.0253637
			Africa	4.5	-0.0452566
			Africa	4.5	0.962972
			Africa	4.5	0.0432968
			Africa	4.5	0.0847965
			Africa	4.5	0.0601039
			Africa	4.5	0.600488
			Africa	4.5	0.945935
			Africa	4.5	0.00881063
			Africa	4.5	0.61015
			Africa	4.5	0.394415
			Africa	4.5	0.394415
			Africa	4.5	0.496437
			Africa	4.5	0.264053
			Africa	4.5	0.503104
			Africa	4.5	0.526093
			Africa	4.5	0.185065
			Africa	4.5	0.272457
			Africa	4.5	0.412764
			Africa	4.5	0.0708958
			Africa	4.5	0.235314
			Africa	4.5	0.129954
			Africa	4.5	-0.0164613
			Africa	4.5	0.0934532
			Africa	4.5	0.144189
			Africa	4.5	-0.0331981
			Africa	4.5	-0.00819677
			Africa	4.5	0.100861
			Africa	4.5	0.0811255
			Africa	4.5	-0.033416
			Africa	4.5	0.578879
			Africa	4.5	0.127646
			Africa	4.5	-0.0141846
			Africa	4.5	0.233419
			Africa	4.5	0.164161
			Africa	4.5	-0.0629748
			Africa	4.5	0.00934586
			Africa	4.5	0.278126
			Africa	4.5	-0.00181324
			Africa	4.5	0.0546391
			Africa	4.5	0.0563529
			Africa	4.5	0.0390814
			Africa	4.5	0.0143887
			Africa	4.5	0.0179538
			Africa	4.5	-0.0054496
			Africa	4.5	0.230364
			Africa	4.5	0.0303053
			Africa	4.5	0.0198026
			Africa	4.5	0.0712467
			Africa	4.5	-0.0553501
			Africa	4.5	-0.00617286
			Africa	4.5	0.069813
			Africa	4.5	0.0243173
			Africa	4.5	0.0582689
			Africa	4.5	-0.0392207
			Africa	4.5	0.241162
			Africa	4.5	0.170544
			Africa	4.5	0.345873
			Africa	4.5	0.385993
			Africa	4.5	0.856699
			Africa	4.5	0.23791
			Africa	4.5	0.269964
			Africa	4.5	0.149417
			Africa	4.5	0.180943
			Africa	4.5	0.81093
			Africa	4.5	1.32176
			Africa	4.5	1.41099
			Africa	4.5	0.371564
			Africa	4.5	1.05605
			Africa	4.5	1.3284
			Africa	4.5	1.09861
			Africa	4.5	0.24471
			Africa	4.5	0.358403
			Africa	4.5	0.376617
			Africa	4.5	0.173595
			Africa	4.5	0.195271
			Africa	4.5	0.20497
			Africa	4.5	0.167601
			Africa	4.5	0.281144
			Africa	4.5	0.279354
			Africa	4.5	0.0526992
			Africa	4.5	0.0649443
			Africa	4.5	0.0909718
			Africa	4.5	0.0382212
			Africa	4.5	-0.053346
			Africa	4.5	0.127833
			Africa	4.5	0.137312
			Africa	4.5	0.10276
			Africa	4.5	0.142957
			Africa	4.5	-0.0370413
			Africa	4.5	-0.171472
			Africa	4.5	0.10899
			Africa	4.5	0.370518
			Africa	4.5	0.0645385
			Africa	4.5	0.332134
			Africa	4.5	0.103541
			Africa	4.5	0.0239532
			Africa	4.5	0.629296
			Africa	4.5	0.512885
			Africa	4.5	0.537277
			Africa	4.5	0.402023
			Africa	4.5	0.645645
			Africa	4.5	0.531234
			Africa	4.5	0.34527
			Africa	4.5	0.323129
			Africa	4.5	0.595773
			Africa	4.5	0.57955
			Africa	4.5	0.619039
			Africa	4.5	0.568208
			Africa	4.5	0.612825
			Africa	4.5	0.672528
			Africa	4.5	0.601856
			Africa	4.5	0.590765
			Africa	4.5	0.630843
			Africa	4.5	0.623675
			Africa	4.5	0.167054
			Africa	4.5	0.475424
			Africa	4.5	0.133037
			Africa	4.5	0.262668
			Africa	4.5	0.55792
			Africa	4.5	0.76556
			Africa	4.5	0.212814
			Africa	4.5	0.298493
			Africa	4.5	0.299913
			Africa	4.5	-0.0315816
			Africa	4.5	0.10562
			Africa	4.5	0.0205135
			Africa	4.5	0.0230484
			Africa	4.5	0.128662
			Africa	4.5	0.103286
			Africa	4.5	0.126382
			Africa	4.5	0.0891679
			Africa	4.5	0.121805
			Africa	4.5	0.142237
			Africa	4.5	-0.0235922
			Africa	4.5	0.15563
			Africa	4.5	-0.121027
			Africa	4.5	0.110271
			Africa	4.5	-0.0315816
			Africa	4.5	0.100947
			Africa	4.5	0.231241
			Africa	4.5	0.063013
			Africa	4.5	0.549108
			Africa	4.5	0.612766
			Africa	4.5	0.0706176
			Africa	4.5	0.0398459
			Africa	4.5	0.849176
			Africa	4.5	0.889622
			Africa	4.5	0.90748
			Africa	4.5	0.76097
			Africa	4.5	0.740265
			Africa	4.5	0.81093
			Africa	4.5	0.750671
			Africa	4.5	0.856652
			Africa	4.5	0.90748
			Africa	4.5	0.225199
			Africa	4.5	0.0258963
			Africa	4.5	0.208636
			Africa	4.5	0.168161
			Africa	4.5	0.0603825
			Africa	4.5	0.0183491
			Africa	4.5	-0.076961
			Africa	4.5	-0.0150301
			Africa	4.5	-0.036139
			Africa	4.5	0.38646
			Africa	4.5	-0.0201349
			Africa	4.5	0.0889475
			Africa	4.5	0.0390929
			Africa	4.5	0.0326826
			Africa	4.5	0.0197375
			Africa	4.5	0.0549411
			Africa	4.5	0.0422827
			Africa	4.5	0.0454624
			Africa	4.5	0.631634
			Africa	4.5	0.597837
			Africa	4.5	0.751094
			Africa	4.5	0.413012
			Africa	4.5	0.698813
			Africa	4.5	0.588418
			Africa	4.5	0.488998
			Africa	4.5	0.420503
			Africa	4.5	0.634651
			Africa	4.5	0.262942
			Africa	4.5	0.422857
			Africa	4.5	0.489548
			Africa	4.5	0.245449
			Africa	4.5	0.59029
			Africa	4.5	0.484929
			Africa	4.5	0.313658
			Africa	4.5	0.372341
			Africa	4.5	0.598589
			Africa	4.5	0.0462332
			Africa	4.5	0.0729807
			Africa	4.5	0.0432166
			Africa	4.5	0.0279956
			Africa	4.5	0.204678
			Africa	4.5	0.087537
			Africa	4.5	-0.0651696
			Africa	4.5	-0.131281
			Africa	4.5	0.0611812
			Africa	4.5	0.143101
			Africa	4.5	0.00766287
			Africa	4.5	0.0953102
			Africa	4.5	0.0451204
			Africa	4.5	-0.0286105
			Africa	4.5	0.0859424
			Africa	4.5	0.0835867
			Africa	4.5	0.156346
			Africa	4.5	0.0597192
			Africa	4.5	0.183565
			Africa	4.5	0.152016
			Africa	4.5	0.139113
			Africa	4.5	0.229096
			Africa	4.5	0.180454
			Africa	4.5	0.0925928
			Africa	4.5	0.109457
			Africa	4.5	0.158406
			Africa	4.5	0.145585
			Africa	4.5	1.37499
			Africa	4.5	1.24146
			Africa	4.5	1.28623
			Africa	4.5	1.19154
			Africa	4.5	1.02882
			Africa	4.5	1.28436
			Africa	4.5	1.11348
			Africa	4.5	1.2447
			Africa	4.5	1.13176
			Africa	4.5	0.813396
			Africa	4.5	1.27474
			Africa	4.5	1.24127
			Africa	4.5	0.993252
			Africa	4.5	1.30231
			Africa	4.5	1.02564
			Africa	4.5	1.26224
			Africa	4.5	1.14916
			Africa	4.5	0.37678
			Africa	4.5	0.371475
			Africa	4.5	0.401171
			Africa	4.5	0.364357
			Africa	4.5	0.349969
			Africa	4.5	0.392528
			Africa	4.5	0.309298
			Africa	4.5	0.348155
			Africa	4.5	0.348155
			Africa	2.66667	0.689294
			Africa	2.66667	0.430783
			Africa	2.66667	0.457912
			Africa	2.66667	0.807506
			Africa	5.33333	0.870078
			Africa	5.33333	0.953905
			Africa	5.33333	1.02853
			Africa	5.33333	1.11306
			Africa	5.33333	1.19731
			Africa	5.33333	1.2766
			Africa	5.33333	1.38297
			Africa	5.33333	1.39668
			Africa	2.66667	0.277632
			Africa	2.66667	0.817133
			Africa	2.66667	1.14039
			Africa	2.66667	0.668854
			Africa	2.66667	-0.0584962
			Africa	2.66667	0.390198
			Africa	2.66667	0.92759
			Africa	2.66667	0.492476
			Africa	2.66667	0.0558805
			Africa	2.66667	0.397773
			Africa	2.66667	0.461346
			Africa	2.66667	0.450416
			Africa	2.66667	0.135956
			Africa	2.66667	0.837542
			Africa	2.66667	1.07238
			Africa	2.66667	0.369217
			Africa	2.66667	0.207228
			Africa	2.66667	0.548274
			Africa	2.66667	0.676563
			Africa	2.66667	0.378797
			Africa	2.66667	0.191762
			Africa	2.66667	0.668455
			Africa	2.66667	0.867988
			Africa	2.66667	0.82617
			Africa	8	0.189152
			Africa	8	0.276953
			Africa	8	0.0919445
			Africa	8	0.305354
			Africa	8	0.276164
			Africa	8	0.344103
			Africa	8	0.321714
			Africa	8	0.35292
			Africa	8	0.377131
			Africa	8	0.479201
			Africa	8	0.576795
			Africa	8	0.413588
			Africa	2	0.606136
			Africa	2	0.182322
			Africa	2	0.236389
			Africa	2	0.652325
			Africa	2	0.277632
			Africa	2	0.307485
			Africa	3	0.360739
			Africa	3	0.526093
			Africa	3	0.715519
			Africa	3	0.139172
			Africa	3	0.507199
			Africa	3	0.456909
			Africa	3	0.137621
			Africa	3	0.809107
			Africa	3	1.05677
			Africa	3	0.11596
			Africa	3	0.809107
			Africa	3	1.05105
			Africa	3	0.284252
			Africa	3	0.398592
			Africa	3	0.555694
			Africa	3	0.217649
			Africa	3	0.346694
			Africa	3	0.543836
			Africa	3	0.042925
			Africa	3	0.923284
			Africa	3	1.06592
			Africa	3	0.0921153
			Africa	3	0.816761
			Africa	3	1.12173
			Africa	3	0.557192
			Africa	3	0.581174
			Africa	3	0.786143
			Africa	3	0.758744
			Africa	3	0.557192
			Africa	3	0.762705
			Africa	2.5	0.101783
			Africa	2.5	1.11045
			Africa	2.5	0.305382
			Africa	2.5	1.15643
			Africa	2.5	1.23214
			Africa	3.33333	0.336472
			Africa	3.33333	0.382992
			Africa	3.33333	0.360003
			Africa	3.33333	0.405465
			Africa	3.33333	0.427444
			Africa	3.33333	1.0116
			Africa	3.33333	1.32176
			Africa	3.33333	1.44692
			Africa	3.33333	2.60269
			Africa	3.33333	2.72458
			Africa	3	0.343019
			Africa	3	0.329882
			Africa	3	0.713062
			Africa	3	0.727049
			Africa	3	0.551372
			Africa	3	0.524524
			Africa	3	0.647103
			Africa	3	0.732368
			Africa	3	0.860778
			Africa	3	0.916291
			Africa	3	0.758467
			Africa	3	0.87755
			Africa	3	0.563
			Africa	3	0.65983
			Africa	3	0.903326
			Africa	3	0.987586
			Africa	3	0.941066
			Africa	3	0.856457
			Africa	3	0.654107
			Africa	3	0.829771
			Africa	3	0.982517
			Africa	3	1.00585
			Africa	3	1.03827
			Africa	3	0.914487
			Africa	3	0.689171
			Africa	3	0.887303
			Africa	3	1.06772
			Africa	3	0.947543
			Africa	3	0.946004
			Africa	3	1.00436
			Africa	3	0.188677
			Africa	3	0.237251
			Africa	3	0.586572
			Africa	3	0.634058
			Africa	3	0.72805
			Africa	3	0.730685
			Africa	3	0.90397
			Africa	3	1.00041
			Africa	3	0.977635
			Africa	3	1.10031
			Africa	3	0.731926
			Africa	3	1.0719
			Africa	3	0.969831
			Africa	3	1.24559
			Africa	3	1.335
			Africa	3	1.33992
			Africa	3	1.33992
			Africa	3	1.40793
			Africa	3	0.580427
			Africa	3	0.884313
			Africa	3	0.898881
			Africa	3	0.863126
			Africa	3	0.972546
			Africa	3	0.89474
			Africa	3	0.742995
			Africa	3	0.742995
			Africa	3	0.955511
			Africa	3	0.915401
			Africa	3	0.970779
			Africa	3	1.00063
			Africa	1	1.29545
			Africa	1	1.22067
			Africa	1	1.30139
			Africa	1	1.33255
			Africa	2	1.21541
			Africa	2	1.19687
			Africa	2	1.26408
			Africa	2	1.24183
			Africa	6	0.334429
			Africa	6	0.619039
			Africa	6	0.638087
			Africa	6	0.65678
			Africa	6	0.356675
			Africa	6	0.451985
			Africa	6	0.538997
			Africa	6	0.579818
			Africa	6	0.496437
			Africa	6	0.517943
			Africa	6	0.435318
			Africa	6	0.563935
			Africa	6	0.435318
			Africa	6	0.241162
			Africa	6	0.192372
			Africa	6	0.192372
			Africa	6	0.415515
			Africa	6	0.241162
			Africa	6	0.374693
			Africa	6	0.336472
			Africa	6	1.06471
			Africa	6	1.06126
			Africa	6	0.993252
			Africa	6	1.01015
			Africa	6	0.976068
			Africa	6	0.741937
			Africa	6	0.955511
			Africa	6	0.875469
			Africa	6	0.693147
			Africa	6	0.747214
			Africa	6	0.510826
			Africa	6	0.606136
			Africa	6	0.476924
			Africa	6	0.476924
			Africa	6	0.476924
			Africa	6	0.543615
			Africa	6	0.606136
			Africa	6	0.415515
			Africa	6	0.473784
			Africa	6	0.510826
			Africa	6	0.264693
			Africa	6	0.374693
			Africa	6	0.415515
			Africa	6	0.241162
			Africa	6	0.287682
			Africa	6	0.310155
			Africa	6	0.242946
			Africa	6	0.262364
			Africa	6	0.281412
			Africa	6	0.223144
			Africa	6	0.262364
			Africa	6	0.318454
			Africa	6	0.262364
			Africa	6	0.0953102
			Africa	6	0.300105
			Africa	6	0.847298
			Africa	6	1.04145
			Africa	6	0.980829
			Africa	6	1.04145
			Africa	6	0.980829
			Africa	6	1.04145
			Africa	6	0.405465
			Africa	6	0.510826
			Africa	6	0.405465
			Africa	6	0.550046
			Africa	6	0.382992
			Africa	6	0.382992
			Africa	6	0.510826
			Africa	6	0.550046
			Africa	6	0.550046
			Africa	6	0.470004
			Africa	6	0.470004
			Africa	6	0.510826
			Africa	6	0.414944
			Africa	6	0.470004
			Africa	6	0.505095
			Africa	6	0.251314
			Africa	6	0.395896
			Africa	6	0.395896
			Africa	6	0.273293
			Africa	6	0.315853
			Africa	6	0.336472
			Africa	4	0.329479
			Africa	4	0.346871
			Africa	4	0.25672
			Africa	4	0.31178
			Africa	4	0.363965
			Africa	4	0.178248
			Africa	1.5	0.105361
			Africa	1.5	0
			Africa	1.5	0
			Africa	1.5	0.274437
			Africa	1.5	0.719123
			Africa	1.5	0.816761
			Africa	1.5	0
			Africa	1.5	0.310155
			Africa	1.5	0.492476
			Africa	1.5	1.17007
			Africa	1.5	0.747214
			Africa	1.5	0.510826
			Africa	1.5	1.54045
			Africa	1.5	1.34373
			Africa	2.66667	-0.207168
			Africa	2.66667	-0.0898039
			Africa	2.66667	0.423703
			Africa	2.66667	0.586422
			Africa	2.66667	-0.0338341
			Africa	2.66667	-0.0563529
			Africa	2.66667	-0.0257695
			Africa	2.66667	-0.0986425
			Africa	2.66667	0.194788
			Africa	2.66667	0
			Africa	2.66667	0.12453
			Africa	2.66667	0.387381
			Africa	2.66667	-0.220731
			Africa	2.66667	0.0425596
			Africa	2.66667	0.152078
			Africa	2.66667	0.0811569
			Africa	2.66667	0.224091
			Africa	2.66667	0.0463046
			Africa	2.66667	0.528675
			Africa	2.66667	-0.0556608
			Africa	2.66667	-0.0323653
			Africa	2.66667	0.196028
			Africa	2.66667	0.163629
			Africa	2.66667	0.0219789
			Africa	2.66667	0.519675
			Africa	2.66667	0.150971
			Africa	2.66667	0.236885
			Africa	2.66667	0.124053
			Africa	2.66667	0.320168
			Africa	2.66667	-0.0649579
			Africa	2.66667	0.298493
			Africa	2.66667	0.202645
			Africa	2.66667	0.335437
			Africa	2.66667	0.373561
			Africa	2.66667	-0.023586
			Africa	2.66667	0
			Africa	2.66667	-0.100452
			Africa	2.66667	0.0253178
			Africa	2.66667	0.0411958
			Africa	2.66667	0.04567
			Africa	2.66667	0.261645
			Africa	2.66667	-0.047856
			Africa	2.66667	-0.105361
			Africa	2.66667	0.0281709
			Africa	2.66667	0.109815
			Africa	2.66667	0.0538792
			Africa	2.66667	0.020504
			Africa	2.66667	0.0865405
			Africa	2.66667	0.0478032
			Africa	2.66667	0.0112361
			Africa	2.66667	-0.0558374
			Africa	2.66667	-0.0880333
			Africa	2.66667	0.19195
			Africa	2.66667	0.287682
			Africa	2.66667	-0.0906373
			Africa	2.66667	0.141695
			Africa	2.66667	0.151806
			Africa	2.66667	0.108634
			Africa	2.66667	0.0621604
			Africa	2.66667	0.101553
			Africa	2.66667	0.0732593
			Africa	2.66667	0.0554414
			Africa	1	0.325422
			Africa	1	0.653926
			Africa	2	0.693147
			Africa	2	0.944462
			Africa	2	0.538997
			Africa	2	0.944462
			Africa	1	0.599621
			Africa	1	1.36098
			Africa	2	0.41723
			Africa	2	0.218002
			Africa	2	0.326846
			Africa	2	0.152451
			Africa	2	0.263409
			Africa	2	0.255779
			Africa	2	0.158388
			Africa	2	0.676593
			Africa	2	0.57359
			Africa	1.33333	0.333269
			Africa	1.33333	0.623621
			Africa	1.33333	0.932255
			Africa	1.33333	0.732589
			Africa	2	0.461035
			Africa	2	0.587787
			Africa	2	0.374515
			Africa	2	0.393637
			Africa	2	0.267588
			Africa	2	0.221994
			Africa	2	0.0758985
			Africa	2	-0.13815
			Africa	2	0.321382
			Africa	2	0.136595
			Africa	2	0.245439
			Africa	2	0.220959
			Africa	2	0.230838
			Africa	2	0.101491
			Africa	2	0.00410005
			Africa	2	0.489309
			Africa	2	0.386306
			Africa	2	0.403814
			Africa	2	0.243282
			Africa	2	0.269809
			Africa	2	0.355875
			Africa	2	0.295037
			Africa	2	0.118049
			Africa	2	0.850826
			Africa	2	0.254206
			Africa	2	0.377177
			Africa	2	0.443595
			Africa	2	0.58772
			Africa	2	0.234463
			Africa	2	0.23683
			Africa	2	0.892797
			Africa	2	0.560312
			Africa	2	0.574144
			Africa	2	0.855596
			Africa	2	0.759125
			Africa	2	0.75648
			Africa	2	1.06959
			Africa	2	0.607035
			Africa	2	0.912985
			Africa	2	1.13157
			Africa	2	1.14792
			Africa	2	1.25398
			Africa	2	1.04612
			Africa	2	0.908169
			Africa	2	0.924347
			Africa	2	0.800506
			Africa	2	0.581499
			Africa	2	0.857357
			Africa	2	0.96382
			Africa	2	1.0549
			Africa	2	0.97934
			Africa	2	1.23511
			Africa	2	1.29054
			Africa	2	1.16676
			Africa	2	0.0102042
			Africa	2	-0.0943811
			Africa	2	0.176159
			Africa	2	0.180553
			Africa	2	0.185784
			Africa	2	0.190663
			Africa	2	0.155161
			Africa	2	0.201268
			Africa	2	0.377439
			Africa	2	0.0856914
			Africa	2	0.19367
			Africa	2	0.13168
			Africa	2	0.300325
			Africa	2	0.125046
			Africa	2	0.28609
			Africa	2	0.265717
			Africa	2	0.10024
			Africa	2	0.168289
			Africa	2	0.415914
			Africa	2	0.334247
			Africa	2	0.340794
			Africa	2	0.330607
			Africa	2	0.373492
			Africa	2	0.386915
			Africa	2	0.430102
			Africa	2	0.210823
			Africa	2	0.31811
			Africa	4.5	0.520434
			Africa	4.5	0.716998
			Africa	4.5	0.740294
			Africa	4.5	0.452612
			Africa	4.5	0.67224
			Africa	4.5	0.686227
			Africa	4.5	0.759839
			Africa	4.5	0.989413
			Africa	4.5	1.03942
			Africa	4	1.01538
			Africa	4	0.88669
			Africa	4	0.965081
			Africa	4	0.940983
			Africa	4	0.949081
			Africa	4	0.980829
			Africa	4	0.957113
			Africa	4	0.988611
			Africa	4	0.99248
			Africa	4	0.869771
			Africa	4	1.13943
			Africa	4	0.994934
			Africa	4	1.06784
			Africa	4	1.04412
			Africa	4	1.08334
			Africa	4	1.04412
			Africa	4	1.06
			Africa	4	1.04412
			Africa	2	0.277632
			Africa	2	0.336472
			Africa	2	0.182322
			Africa	2	0.806476
			Africa	2	0.587787
			Africa	2	0.875469
			Africa	2	0.847298
			Africa	2	0.980829
			Africa	2	1.34373
			Africa	4	0.807436
			Africa	4	0.787234
			Africa	4	0.979708
			Africa	4	0.979708
			Africa	4	1.00465
			Africa	4	0.902747
			Africa	4	0.996161
			Africa	4	1.08352
			Africa	4	0.983634
			Africa	4	1.17432
			Africa	4	1.48517
			China	2	-0.0768283
			China	2	-0.0148045
			China	2	0.0628112
			China	2	0.0421226
			China	2	0.0664201
			China	2	0.047507
			China	2.66667	0.770053
			China	2.66667	0.994222
			China	2.66667	1.15588
			China	2.66667	0.60302
			China	3.33333	0.27844
			China	3.33333	0.33981
			China	3.33333	0.340998
			China	3.33333	0.393125
			China	3.33333	0.414343
			China	3.33333	0.28685
			China	3.33333	0.33766
			China	3.33333	0.345048
			China	3.33333	0.399209
			China	3.33333	0.410856
			China	4	0.0207018
			China	4	0.0441955
			China	4	0.065744
			China	4	0.123864
			China	4	0.0597745
			China	4	0.0493788
			China	2.66667	0.138257
			China	2.66667	0.285283
			China	2.66667	0.240658
			China	2.66667	0.212646
			China	2.66667	0.0375294
			China	2.66667	0.195675
			China	2.66667	0.1419
			China	2.66667	0.123552
			China	2.66667	0.0275117
			China	2.66667	0.0608166
			China	2.66667	0.0412421
			China	2.66667	0.0477548
			China	2.66667	0.0479193
			China	2.66667	0.083507
			China	2.66667	0.051571
			China	2.66667	0.0340181
			China	2.66667	0.133119
			China	2.66667	0.1747
			China	2.66667	0.151479
			China	2.66667	0.145848
			China	2.66667	0.245592
			China	2.66667	0.281553
			China	2.66667	0.261895
			China	2.66667	0.226041
			China	2.66667	0.0274601
			China	2.66667	0.0811283
			China	2.66667	0.107628
			China	2.66667	0.104406
			China	2.66667	0.167576
			China	2.66667	0.212249
			China	2.66667	0.191438
			China	2.66667	0.0807667
			China	2.66667	0.120275
			China	2.66667	0.170843
			China	2.66667	0.158616
			China	2.66667	0.0757898
			China	2.66667	0.0621676
			China	2.66667	0.109168
			China	2.66667	0.112294
			China	2.66667	0.0924494
			China	2.66667	0.198242
			China	2.66667	0.246735
			China	2.66667	0.305569
			China	2.66667	0.287731
			China	2	0.221645
			China	2	0.253705
			China	2	0.233207
			China	2.66667	0.0972508
			China	2.66667	0.0581076
			China	2.66667	0.35582
			China	2.66667	0.111496
			China	1.33333	0.10214
			China	1.33333	0.170762
			China	1.33333	0.131895
			China	1.33333	0.205004
			China	2	0.268524
			China	2	0.381614
			China	2	0.388487
			China	2	0.134371
			China	2	0.0815536
			China	2	0.213493
			China	1.5	0.124643
			China	1.5	0.162962
			China	1.5	0.140146
			China	1.5	0.0919395
			China	1.5	0.125165
			China	1.5	0.0363897
			China	2	0
			China	2	0.0958407
			China	2	0.0959427
			China	2	0.0709008
			China	2	0.262001
			China	2	-0.00251598
			China	2	0.136686
			China	2	0.014473
			China	2	0.0147134
			China	2	0.0819571
			China	2	0.205914
			China	2	0.21169
			China	2	0.0531669
			China	2	0.102281
			China	2	0.056691
			China	2	0.0499622
			China	2	0.0849189
			China	2	0.011788
			China	2	0.142897
			China	2	0.190212
			China	2	0.182933
			China	2	0.00687677
			China	2	0.134718
			China	2	0.0385625
			China	2.66667	0.235256
			China	2.66667	0.19665
			China	2.66667	0.189808
			China	2.66667	0.120692
			China	1.33333	0.00332393
			China	1.33333	0.0520229
			China	2	0.165167
			China	2	0.26999
			China	2	0.19168
			China	2	0.19097
			China	2	0.276778
			China	2	0.323919
			China	2	-0.0103987
			China	2	0.0473523
			China	2	-0.0585793
			China	2.66667	0.139693
			China	2.66667	0.151749
			China	2.66667	0.201112
			China	2.66667	0.134277
			China	2.66667	0.0484468
			China	1.33333	0.0563632
			China	1.33333	0.0245572
			China	1.33333	0.0470374
			China	1.33333	0.0556211
			China	2.66667	0.193473
			China	2.66667	0.285412
			China	2.66667	0.204193
			China	2.66667	0.0920259
			China	2	0.139524
			China	2	0.191795
			China	2	0.123331
			China	2.66667	0.16173
			China	2.66667	0.318115
			China	2.66667	0.257819
			China	2.66667	0.145756
			China	2.66667	0.0346641
			China	2.66667	0.0696723
			China	2.66667	0.0793344
			China	2.66667	0.0629094
			China	2.66667	0.0637408
			China	2.66667	0.101135
			China	2.66667	0.11845
			China	2.66667	0.0861734
			China	2	0.228378
			China	2	0.146584
			China	2	0.0805399
			China	2.66667	0.126264
			China	2.66667	0.187034
			China	2.66667	0.123752
			China	2.66667	0.0748435
			China	2	0.101361
			China	2	0.192838
			China	2	0.301557
			China	2.66667	0.0627237
			China	2.66667	0.0816245
			China	2.66667	0.116624
			China	2.66667	0.127828
			China	2	0.0278667
			China	2	0.0850704
			China	2	0.00096398
			China	2.66667	0.113493
			China	2.66667	0.204202
			China	2.66667	0.335534
			China	2.66667	0.354693
			China	2.43	0.0799043
			China	1.33333	0.25269
			China	1.33333	0.360354
			China	2	0.148342
			China	2	0.240295
			China	2	0.301001
			China	4	0.0820669
			China	4	0.13778
			China	4	0.180423
			China	4	0.150381
			China	4	0.182931
			China	4	0.195313
			China	2	0.00566574
			China	2	0.0224729
			China	2	0
			China	2.66667	0.0376019
			China	2.66667	0.0596346
			China	2.66667	0.108812
			China	2.66667	0.136098
			China	2	0.0384609
			China	2	0.0524089
			China	2	0.0480539
			China	2	-0.100722
			China	2	0.0147827
			China	2	-0.0222267
			China	3.33333	0.258972
			China	3.33333	0.329258
			China	3.33333	0.49944
			China	3.33333	0.621455
			China	3.33333	0.576543
			China	2	0.302135
			China	2	0.433321
			China	2	0.417204
			China	1.5	0.0776197
			China	1.5	0.117328
			China	1.5	0.0850759
			China	1.5	0.348076
			China	1.5	0.384027
			China	1.5	0.429525
			China	2	0.00189574
			China	2	-0.00208947
			China	2	0.00189574
			China	2.66667	0.0500581
			China	2.66667	0.0319411
			China	2.66667	0.0601878
			China	2.66667	0.212068
			China	2.66667	0.0798364
			China	2	0.0284261
			China	2	0.0612954
			China	2	0.0593564
			China	3.33333	0.155973
			China	3.33333	0.0789516
			China	3.33333	0.104179
			China	3.33333	0.227618
			China	3.33333	0.320634
			China	2.66667	0.231091
			China	2.66667	0.242315
			China	2.66667	0.239094
			China	2.66667	0.178659
			China	2.66667	0.21915
			China	2.66667	0.278777
			China	2.66667	0.331793
			China	2.66667	0.293636
			China	2.66667	0.0318111
			China	2.66667	0.106065
			China	2.66667	0.126365
			China	2.66667	0.113228
			China	2	0.0225998
			China	2	0.184225
			China	2	0.143878
			China	0.666667	0.0904991
			China	0.666667	0.2527
			China	2	-0.0909718
			China	2	-0.0444518
			China	2	0
			China	1.5	0.127098
			China	1.5	0.0977989
			China	1.5	0.0141163
			China	2	0.0778647
			China	2	0.061032
			China	2	0.0492263
			China	2	0.209289
			China	2	0.307009
			China	2	0.265861
			China	1.5	0.115107
			China	1.5	0.188663
			China	1.5	0.119114
			China	2	0.230705
			China	2	0.292899
			China	2	0.251656
			China	2	0.176811
			China	2	0.178295
			China	2	0.17874
			China	0.666667	0.0781803
			China	0.666667	0.606978
			China	0.666667	0.485064
			China	0.666667	0.452143
			China	2	0.0433621
			China	2	0.141687
			China	2	0.128219
			China	2	0.312769
			China	2	0.448651
			China	2	0.440145
			China	1.33333	0.299569
			China	1.33333	0.21173
			China	0.666667	1.44533
			China	0.666667	2.00917
			China	2	0.00453925
			China	2	-0.00304153
			China	2	-0.00124103
			China	2	0.0786831
			China	2	0.191395
			China	2	0.0939506
			China	1.33333	0.0512991
			China	1.33333	0.0840567
			China	1.33333	0.0636798
			China	1.33333	0.0738909
			China	0.666667	0.317358
			China	0.666667	0.299046
			China	0.666667	0.0406955
			China	0.666667	0.0368695
			China	0.666667	0.0736348
			China	0.666667	0.0512223
			China	0.666667	1.08878
			China	0.666667	0.911943
			China	0.666667	0.23002
			China	0.666667	0.223697
			China	0.666667	0.00557105
			China	0.666667	0.00415801
			China	0.666667	0.00689064
			China	0.666667	0.0165559
			China	0.666667	0.60976
			China	0.666667	0.501553
			China	2	0.380524
			China	2	0.271449
			China	2	0.244031
			China	2	0.0827243
			China	2	0.0500605
			China	2	0.0441839
			China	2	0.0309169
			China	2	0.0198598
			China	2	0.0182333
			China	2	0.166203
			China	2	0.0797103
			China	2	0.0284356
			China	0.666667	0.0255302
			China	0.666667	0.129038
			China	0.666667	0.105379
			China	0.666667	0.104544
			China	0.666667	0.06027
			China	2	0.11373
			China	2	0.103816
			China	2	0.0109933
			China	0.666667	0.0846639
			China	2	0.198689
			China	2	0.34972
			China	2	0.410638
			China	2	0.341804
			China	2	0.332902
			China	2	0.22439
			China	2.66667	0.355543
			China	2.66667	0.3487
			China	2.66667	0.435287
			China	2.66667	0.434371
			China	2.66667	0.197151
			China	2.66667	0.145338
			China	2.66667	0.0967784
			China	2.66667	0.087645
			China	2	0.233776
			China	2	0.0743262
			China	2	-0.0169665
			China	2	0.205495
			China	2	0.17154
			China	2	0.0732591
			China	2.66667	0.725212
			China	2.66667	0.25919
			China	2.66667	0.193495
			China	2.66667	0.146093
			China	0.666667	0.0909313
			China	2	0.116815
			China	2	0.10531
			China	2	0.0793728
			China	2	0.0679148
			China	2	0.0584589
			China	2	0.0457851
			China	1.33333	0.248126
			China	1.33333	0.243175
			China	1.33333	0.214445
			China	1.33333	0.147311
			China	1.33333	0.129422
			China	1.33333	0.110814
			China	1.33333	0.108697
			China	1.33333	0.101795
			China	1.33333	0.0818319
			China	1.33333	0.0766855
			China	1.33333	0.0423147
			China	1.33333	-0.0306288
			China	2	0.0632508
			China	2	0.0243555
			China	2	0.0153249
			China	2	0.0791324
			China	2	0.0740169
			China	2	0.0160901
			China	0.666667	0.0127661
			China	0.666667	0.0252363
			China	0.666667	0.681064
			China	0.666667	0.639728
			China	0.666667	0.423124
			China	0.666667	0.289488
			China	0.666667	0.234564
			China	0.666667	0.204879
			China	0.666667	0.198194
			China	0.666667	0.17353
			China	0.666667	0.1685
			China	0.666667	0.165481
			China	0.666667	0.1633
			China	0.666667	0.100619
			China	0.666667	0.0929523
			China	0.666667	0.080088
			China	0.666667	0.063827
			China	0.666667	0.0589162
			China	0.666667	0.044824
			China	0.666667	0.0434958
			China	0.666667	0.0256864
			China	0.666667	0.017788
			China	0.666667	-0.00346672
			China	0.666667	-0.0166908
			China	0.666667	-0.0194181
			China	0.666667	-0.0286253
			China	0.666667	-0.0508343
			China	0.666667	0.0375548
			China	0.666667	-0.0396951
			China	1.33333	0.2561
			China	1.33333	0.345853
			China	2	0.359042
			China	2	0.438921
			China	2	0.472052
			China	2	0.111864
			China	2	0.153012
			China	2	0.205778
			China	2.66667	0.0188685
			China	2.66667	0.0555699
			China	2.66667	0.145954
			China	2.66667	0.163495
			China	2.66667	0.180335
			China	2.66667	0.00754815
			China	2.66667	0.0444522
			China	2.66667	0.0150385
			China	2.66667	0.00754815
			China	2.66667	0.00647219
			China	2.66667	0.0382215
			China	2.66667	0.0256423
			China	2.66667	0.0192934
			China	1.33333	-0.048155
			China	1.33333	-0.024113
			China	1.33333	0.234743
			China	1.33333	0.268336
			China	1.33333	0.280154
			China	1.33333	0.48822
			China	1.33333	0.29682
			China	1.33333	0.470217
			China	1.33333	0.67753
			China	1.33333	0.490039
			China	1.33333	0.54155
			China	1.33333	0.482182
			China	1.33333	-0.246979
			China	1.33333	-0.143854
			China	1.33333	0.0860784
			China	1.33333	0.190816
			China	1.33333	-0.00448552
			China	1.33333	0.158132
			China	1.33333	0.161806
			China	1.33333	0.120632
			China	1.33333	0.0924575
			China	1.33333	0.0189071
			China	1.33333	0.0380691
			China	1.33333	0.0163083
			China	0.666667	0.186072
			China	0.666667	0.0746633

## Sheet: A. Referece
R. NO	First Author	Publication year		Title
1	Njui NA et al	199	Response of maize to phosphorus fertilisation at selected sites in western Kenya
2	Hadgu et al.	2013	Maize (Zea mays L.) crop response to phosphorus fertilization on fluvisols in Northern Ethiopia
3	Materechera et al.	2009		Response of maize to phosphorus from fertilizer and chicken manure in a semi-arid enviroment.
4	Onasanya et al.	2009		Growth and Yield Response Maize maize(Zea mays) to different rates of Nitrogen and Phosphoras fertilizers.
5	Taye et al.	2015		Effects of Nitrogen and Phosphorus Fertilizers on the Yield of Maize (Zea mays L.) at Nedjo, West Wollega, Ethiopia
8	Njoroge et al.	2018		Maize(Zea mays) Response to secondary and Micro nutrieents for profitable N, P, and K fertilizer use in poorly responsive soil
9	Zingare et al.	2012		Optimizing phosphoras and manure pplication in maize soya bean rotation
10	Arubalueze et al.	2009		Response of maize(Zea mays L.) To Nitrogen and phosphoras fertilizers ratein tropical utisoil of south eastern Nigeria
11	Ivan Bernardo cuvaca	2014		Effect of Nitrogen, phosphoras and potasium fertilizer rates, and contrasting soil type and tillage on maize grain yield
12	Omar	2014		Effect of Farm yard manure and phosphoras fertilization on yield and yield components of maize
13	Smaling et al.	1992		Yield response of maize to fertilizers and manure under different agro ecological condition
14	Besufikad Enideg	2018		Response of maize yield and yiled related components to different level of phosphoras feritlizers
15	Maccarthy et al.	2012		Stimulating impact of seosenal cliamatic variation on the response of maize(Zea mays L.) in organic fertilizers
16	Koala et al.	2016		Long term effect of triple supper phosphate and minjingu rock phosphate application on response of maize and soyabean in humid tropical maize legume cropping system
17	Osiname et al.	1999		Response of maize (Zea mays L.) to phosphoras fertilizer application on basaltic soil
18	Sellase	2016		Response and economic feasibilty of maize(Zea may L.) to phosphoras fertilization in acidic alfisoil
19	Opala et al.	2010		Effect of organic and in organic phosphoras source on maize yield in an acidic soil
20	Opala et al.	2012	Comparison of effects of phosphorus sources on soil acidity, available phosphorus and maize yields at two sites in western Kenya
21	SHILULI et al.	2003		Economic analysis of maize yield response to Nitrogen and Phosphoras fertilizers in the sub humid zone of western Kenya
23	Wasonga et al.	2008		phosphoras requirement by maize varieties in different oil type of western kenya
24	Otinga et al.	2013		Partial Subsititution of phosphoras fertilization by farm yard manure and its localised application increases agronomic efficieny and profit of maize production
25	Getachew et al.	2014		Maize response to fertilizer dosing at three sites of central rift valley of Ethiopia
26	Kang BT et al	1979		Phosphoras response of maize grown on Alfisol of southern Nigeria
27	Okalebo JR.	1977		maize response to three high phosphate fertilizer in some soil off east Africa
28	Gacheru et al.	2001		Management of stiga infestation on maize using organic and inorganic nutrient source in western Kenya
31	Ademba et al.	2014		Evaluation of organic and in organic amendements on nutrient up take phosphoras use effecieny and yield of maize in Kissii county kenya
32	Msolla MM et al.	2005		Hard minjingu phosphate rock: an alternative phosphoras for maize productionon acid soil of Tanzania
33	Szillas C et al.	2006		Can Local minjingu phosphate rock repalce super phosphate on acidic soil in Tanzania
34	Jama et al.	2006		Potential of East African phosphate rock deposits in integrated nutrient management strategies
35	Kisinyo PS et al	2013		Immidiate and residual effect of lime and phosphorus fertilizer on soil acidity and maize in western Kenya
37	NGUYEN VAN NGUU	1987		Effect of nitrogen, phosphorus and soil and crop residues management practices on maize (Zea mays L.) yield in ultisol of eastern Cameroon
38	Omotoso Solomon Olusegun	2015		Nitrogen (N) and Phosphorus (P) Fertilizer Application on Maize (Zea mays L.) Growth and Yield at Ado-Ekiti, South-West, Nigeria
39	Akande et al.	2005		Effects of rock phosphate amended with poultry manure on soil available p and yield of maize and cowpea
40	Akande et al.	2011		Response of Maize and Cowpea Grown Sequentially to Application of Phosphate Rock in the Humid Tropics
41	Wopereis MCS	2006		Mineral fertilizer management of of maize on farmers field differring in organic inputs
42	Mtengeti et al.	2013		Assesment of maize response to Minjingu rock phosphate and and triple supper phosphate applied under different p-applicaion strategies
45	Savini I et al.	2016		Long-term effects of TSP and Minjingu phosphate rock applications on yield response of maize and soybean in a humid tropical maize–legume cropping system
46	Nyambati et al.	2014		The Effect of Minjingu Phosphate Rock and Triple Superphosphate on Soil Phosphorus Fractions and Maize Yield in Western Kenya
48	Ndungu etal	2005		Residual effectiveness of minjingu phosphate rock and fallow biomass on crop yields and financial returns in western kenya
49	Nouri Maman et al.	2018		Maize Sole Crop and Intercrop Response to Fertilizer in Mali and Niger
50	Opala et al.	2012		Comparison of effects of phosphorus sources on soil acidity, available phosphorus and maize yields at two sites in western Kenya
52	Okande MCS et al.	1998		Efficiency of sokoto rock phosphate as a fertilizer source for maize production in Southwestern Nigeria
54	Generose Nziguheba	2000		Organic residues affect phosphorus availability and maize yields in a Nitisol of western Kenya
55	Bationo A	1997		Agronomic and economic evaluation of Tilemsi phosphate rock in different agroecological zones of Mali
56	Ikerra et al	2006		Combining Tithonia diversifolia and minjingu phosphate rock for improvement of P availability and maize grain yields on a chromic acrisol in Morogoro, Tanzani
58	Abaidoo RC et al.	2007		Evaluation of cowpea genotypes for variations in their contribution of N and Pto subsequent maize crop in three agro-ecological zones of WestAfrica
59	Adetunj RC	1994		Phosphorus requirement of a maize-cowpea sequential cropping on a paleudult
60	Ezikiel Akinkunmi Akinrinde	2006		Benefit of phosphate rock in crop production:Experience on bench mark tropical soil Nigeria
61	Sunday Amhakhia et al	2012		Response of Maize (Zea mays L) Yield and Yield Components to rate of applied phophorus fertilizer in Guinea savanna of Soil kogi state Nigeria

## Sheet: Ch. Data base
Reference No.	Location	Experimental Year	Replication	Soil pH	Soil Olsen-P (mg kg-1)	MAP (mm/year)	P used kg ha -1	NK	NPK	Replication	Replication	No data set	W1	W2	Weight	Effect size
1	Hubei Province	2015	3	7.78	35.24	1432.8	4.91266	12657	11721	3	3	3	1.5	0.5	2	-0.0768283
1	Hubei Province	2015	3	7.78	35.24	1432.8	9.82533	12657	12471	3	3	3	1.5	0.5	2	-0.0148045
1	Hubei Province	2015	3	7.78	35.24	1432.8	19.6507	12657	13477.5	3	3	3	1.5	0.5	2	0.0628112
2	Jilin Province	2015	3	6.65	6	741.3	19.6507	7991.2	8335	3	3	3	1.5	0.5	2	0.0421226
2	Jilin Province	2015	3	6.65	6	741.3	39.3013	7991.2	8540	3	3	3	1.5	0.5	2	0.0664201
2	Jilin Province	2015	3	6.65	6	741.3	58.952	7991.2	8380	3	3	3	1.5	0.5	2	0.047507
3	Yunnan Province	2017	3	4.53	4.019	1191.7	39.3013	2019.38	4361.62	3	3	4	1.5	0.375	2.66667	0.770053
3	Yunnan Province	2017	3	4.53	4.019	1191.7	39.3013	2019.38	5457.62	3	3	4	1.5	0.375	2.66667	0.994222
3	Yunnan Province	2017	3	4.53	4.019	1191.7	39.3013	2019.38	6415.21	3	3	4	1.5	0.375	2.66667	1.15588
3	Yunnan Province	2017	3	4.53	4.019	1191.7	39.3013	2019.38	3690.68	3	3	4	1.5	0.375	2.66667	0.60302
4	Hebei Province	2015	3	8	6.4	256	5.45852	8042.28	10624.4	3	3	5	1.5	0.3	3.33333	0.27844
4	Hebei Province	2015	3	8	6.4	256	10.917	8042.28	11296.8	3	3	5	1.5	0.3	3.33333	0.33981
4	Hebei Province	2015	3	8	6.4	256	21.8341	8042.28	11310.3	3	3	5	1.5	0.3	3.33333	0.340998
4	Hebei Province	2015	3	8	6.4	256	43.6681	8042.28	11915.5	3	3	5	1.5	0.3	3.33333	0.393125
4	Hebei Province	2015	3	8	6.4	256	87.3362	8042.28	12171	3	3	5	1.5	0.3	3.33333	0.414343
4	Hebei Province	2015	3	8	6.4	256.4	5.45852	8016.67	10680	3	3	5	1.5	0.3	3.33333	0.28685
4	Hebei Province	2015	3	8	6.4	256.4	10.917	8016.67	11236.7	3	3	5	1.5	0.3	3.33333	0.33766
4	Hebei Province	2015	3	8	6.4	256.4	21.8341	8016.67	11320	3	3	5	1.5	0.3	3.33333	0.345048
4	Hebei Province	2015	3	8	6.4	256.4	43.6681	8016.67	11950	3	3	5	1.5	0.3	3.33333	0.399209
4	Hebei Province	2015	3	8	6.4	256.4	87.3362	8016.67	12090	3	3	5	1.5	0.3	3.33333	0.410856
5	Hubei Province	2015	3	6.85	16.45	1408	65.5022	8653	8834	3	3	6	1.5	0.25	4	0.0207018
5	Hubei Province	2015	3	6.85	16.45	1408	83.8428	8653	9044	3	3	6	1.5	0.25	4	0.0441955
5	Hubei Province	2015	3	6.85	16.45	1408	102.183	8653	9241	3	3	6	1.5	0.25	4	0.065744
5	Hubei Province	2015	3	6.85	16.45	1408	120.524	8653	9794	3	3	6	1.5	0.25	4	0.123864
5	Hubei Province	2015	3	6.85	16.45	1408	102.183	8653	9186	3	3	6	1.5	0.25	4	0.0597745
5	Hubei Province	2015	3	6.85	16.45	1408	55.0218	8653	9091	3	3	6	1.5	0.25	4	0.0493788
6	Jilin Province	2016	3	5.17	16.97	849	13.1004	9078	10424	3	3	4	1.5	0.375	2.66667	0.138257
6	Jilin Province	2016	3	5.17	16.97	849	26.2009	9078	12075	3	3	4	1.5	0.375	2.66667	0.285283
6	Jilin Province	2016	3	5.17	16.97	849	39.3013	9078	11548	3	3	4	1.5	0.375	2.66667	0.240658
6	Jilin Province	2016	3	5.17	16.97	849	52.4017	9078	11229	3	3	4	1.5	0.375	2.66667	0.212646
6	Jilin Province	2015	3	5.38	14.32	849	13.1004	9832	10208	3	3	4	1.5	0.375	2.66667	0.0375294
6	Jilin Province	2015	3	5.38	14.32	849	26.2009	9832	11957	3	3	4	1.5	0.375	2.66667	0.195675
6	Jilin Province	2015	3	5.38	14.32	849	39.3013	9832	11331	3	3	4	1.5	0.375	2.66667	0.1419
6	Jilin Province	2015	3	5.38	14.32	849	52.4017	9832	11125	3	3	4	1.5	0.375	2.66667	0.123552
7	Jilin Province	2015	3	5.4	33.2	754.6	24.0175	9281.7	9540.6	3	3	4	1.5	0.375	2.66667	0.0275117
7	Jilin Province	2015	3	5.4	33.2	754.6	48.0349	9281.7	9863.7	3	3	4	1.5	0.375	2.66667	0.0608166
7	Jilin Province	2015	3	5.4	33.2	754.6	96.0699	9281.7	9672.5	3	3	4	1.5	0.375	2.66667	0.0412421
7	Jilin Province	2015	3	5.4	33.2	754.6	144.105	9281.7	9735.7	3	3	4	1.5	0.375	2.66667	0.0477548
7	Jilin Province	2015	3	5.4	33.2	754.6	24.0175	9666.7	10141.2	3	3	4	1.5	0.375	2.66667	0.0479193
7	Jilin Province	2015	3	5.4	33.2	754.6	48.0349	9666.7	10508.6	3	3	4	1.5	0.375	2.66667	0.083507
7	Jilin Province	2015	3	5.4	33.2	754.6	96.0699	9666.7	10178.3	3	3	4	1.5	0.375	2.66667	0.051571
7	Jilin Province	2015	3	5.4	33.2	754.6	144.105	9666.7	10001.2	3	3	4	1.5	0.375	2.66667	0.0340181
7	Jilin Province	2015	3	5.4	33.2	754.6	24.0175	10345.8	11818.9	3	3	4	1.5	0.375	2.66667	0.133119
7	Jilin Province	2015	3	5.4	33.2	754.6	48.0349	10345.8	12320.7	3	3	4	1.5	0.375	2.66667	0.1747
7	Jilin Province	2015	3	5.4	33.2	754.6	96.0699	10345.8	12037.9	3	3	4	1.5	0.375	2.66667	0.151479
7	Jilin Province	2015	3	5.4	33.2	754.6	144.105	10345.8	11970.3	3	3	4	1.5	0.375	2.66667	0.145848
7	Jilin Province	2015	3	5.4	33.2	754.6	24.0175	9656.3	12344.4	3	3	4	1.5	0.375	2.66667	0.245592
7	Jilin Province	2015	3	5.4	33.2	754.6	48.0349	9656.3	12796.4	3	3	4	1.5	0.375	2.66667	0.281553
7	Jilin Province	2015	3	5.4	33.2	754.6	96.0699	9656.3	12547.3	3	3	4	1.5	0.375	2.66667	0.261895
7	Jilin Province	2015	3	5.4	33.2	754.6	144.105	9656.3	12105.4	3	3	4	1.5	0.375	2.66667	0.226041
7	Jilin Province	2015	3	5.4	33.2	754.6	24.0175	10524.2	10817.2	3	3	4	1.5	0.375	2.66667	0.0274601
7	Jilin Province	2015	3	5.4	33.2	754.6	48.0349	10524.2	11413.6	3	3	4	1.5	0.375	2.66667	0.0811283
7	Jilin Province	2015	3	5.4	33.2	754.6	96.0699	10524.2	11720.1	3	3	4	1.5	0.375	2.66667	0.107628
7	Jilin Province	2015	3	5.4	33.2	754.6	144.105	10524.2	11682.4	3	3	4	1.5	0.375	2.66667	0.104406
8	Jilin Province	2015	3	5.99	26.2	404.67	24.0175	9718.5	11491.5	3	3	4	1.5	0.375	2.66667	0.167576
8	Jilin Province	2015	3	5.99	26.2	404.67	48.0349	9718.5	12016.5	3	3	4	1.5	0.375	2.66667	0.212249
8	Jilin Province	2015	3	5.99	26.2	404.67	96.0699	9718.5	11769	3	3	4	1.5	0.375	2.66667	0.191438
8	Jilin Province	2015	3	5.99	26.2	404.67	144.105	9718.5	10536	3	3	4	1.5	0.375	2.66667	0.0807667
8	Jilin Province	2015	3	5.99	26.2	404.67	24.0175	10821	12204	3	3	4	1.5	0.375	2.66667	0.120275
8	Jilin Province	2015	3	5.99	26.2	404.67	48.0349	10821	12837	3	3	4	1.5	0.375	2.66667	0.170843
8	Jilin Province	2015	3	5.99	26.2	404.67	96.0699	10821	12681	3	3	4	1.5	0.375	2.66667	0.158616
8	Jilin Province	2015	3	5.99	26.2	404.67	144.105	10821	11673	3	3	4	1.5	0.375	2.66667	0.0757898
8	Jilin Province	2015	3	5.99	26.2	404.67	24.0175	11599.5	12343.5	3	3	4	1.5	0.375	2.66667	0.0621676
8	Jilin Province	2015	3	5.99	26.2	404.67	48.0349	11599.5	12937.5	3	3	4	1.5	0.375	2.66667	0.109168
8	Jilin Province	2015	3	5.99	26.2	404.67	96.0699	11599.5	12978	3	3	4	1.5	0.375	2.66667	0.112294
8	Jilin Province	2015	3	5.99	26.2	404.67	144.105	11599.5	12723	3	3	4	1.5	0.375	2.66667	0.0924494
8	Jilin Province	2015	3	5.99	26.2	404.67	24.0175	10250.5	12498	3	3	4	1.5	0.375	2.66667	0.198242
8	Jilin Province	2015	3	5.99	26.2	404.67	48.0349	10250.5	13119	3	3	4	1.5	0.375	2.66667	0.246735
8	Jilin Province	2015	3	5.99	26.2	404.67	96.0699	10250.5	13914	3	3	4	1.5	0.375	2.66667	0.305569
8	Jilin Province	2015	3	5.99	26.2	404.67	144.105	10250.5	13668	3	3	4	1.5	0.375	2.66667	0.287731
9	Inner Mongolia Autonomous Region	2009	3	7.56	34	266.3	22.9258	13021.5	16252.5	3	3	3	1.5	0.5	2	0.221645
9	Inner Mongolia Autonomous Region	2009	3	7.56	34	266.3	45.8515	13021.5	16782	3	3	3	1.5	0.5	2	0.253705
9	Inner Mongolia Autonomous Region	2009	3	7.56	34	266.3	68.7773	13021.5	16441.5	3	3	3	1.5	0.5	2	0.233207
9	Hunan Province	2014	3	5.1	7.2	1270	30.5677	3510	3868.5	3	3	4	1.5	0.375	2.66667	0.0972508
9	Hunan Province	2014	3	5.1	7.2	1270	61.1354	3510	3720	3	3	4	1.5	0.375	2.66667	0.0581076
9	Hunan Province	2014	3	5.1	7.2	1270	87.3362	3510	5010	3	3	4	1.5	0.375	2.66667	0.35582
9	Hunan Province	2014	3	5.1	7.2	1270	52.4017	3510	3924	3	3	4	1.5	0.375	2.66667	0.111496
10	Sichuan Province	2014	3	7.68	4.92	900	26.2009	7198.61	7972.74	3	3	2	1.5	0.75	1.33333	0.10214
10	Sichuan Province	2014	3	7.68	4.92	900	26.2009	7240.92	8589.24	3	3	2	1.5	0.75	1.33333	0.170762
10	Sichuan Province	2014	3	7.68	4.92	900	26.2009	6554.71	7478.85	3	3	2	1.5	0.75	1.33333	0.131895
10	Sichuan Province	2014	3	7.68	4.92	900	26.2009	6640.1	8150.92	3	3	2	1.5	0.75	1.33333	0.205004
11	Inner Mongolia Autonomous Region	2013	3	8.3	10.81	399.1	28.3843	10197	13338	3	3	3	1.5	0.5	2	0.268524
11	Inner Mongolia Autonomous Region	2013	3	8.3	10.81	399.1	56.7686	10197	14935	3	3	3	1.5	0.5	2	0.381614
11	Inner Mongolia Autonomous Region	2013	3	8.3	10.81	399.1	194.323	10197	15038	3	3	3	1.5	0.5	2	0.388487
12	Gansu province	2014	3	5.26	11.35	390.9	117.904	8038	9194	3	3	3	1.5	0.5	2	0.134371
12	Gansu province	2014	3	5.26	11.35	390.9	240.175	8038	8721	3	3	3	1.5	0.5	2	0.0815536
12	Gansu province	2014	3	5.26	11.35	390.9	209.607	8038	9951	3	3	3	1.5	0.5	2	0.213493
13	Shandong Province	2012	4	7.4	37.7	473.1	19.6507	11092	12564.4	4	4	3	2	0.666667	1.5	0.124643
13	Shandong Province	2012	4	7.4	37.7	473.1	39.3013	11092	13055.2	4	4	3	2	0.666667	1.5	0.162962
13	Shandong Province	2012	4	7.4	37.7	473.1	58.952	11092	12760.7	4	4	3	2	0.666667	1.5	0.140146
13	Shandong Province	2012	4	7.4	37.7	473.1	19.6507	13251.5	14527.6	4	4	3	2	0.666667	1.5	0.0919395
13	Shandong Province	2012	4	7.4	37.7	473.1	39.3013	13251.5	15018.4	4	4	3	2	0.666667	1.5	0.125165
13	Shandong Province	2012	4	7.4	37.7	473.1	58.952	13251.5	13742.6	4	4	3	2	0.666667	1.5	0.0363897
14	Guangdong Province	2012	3	5.2	18.9	1273.4	49.1266	13362	13362	3	3	3	1.5	0.5	2	0
14	Guangdong Province	2012	3	5.2	18.9	1273.4	98.2533	13362	14706	3	3	3	1.5	0.5	2	0.0958407
14	Guangdong Province	2012	3	5.2	18.9	1273.4	147.38	13362	14707.5	3	3	3	1.5	0.5	2	0.0959427
15	Ningxia Hui Autonomous Region	2012	3		25.5	214.1	19.6507	9949	10680	3	3	3	1.5	0.5	2	0.0709008
15	Ningxia Hui Autonomous Region	2012	3		25.5	214.1	87.3362	9949	12929	3	3	3	1.5	0.5	2	0.262001
15	Ningxia Hui Autonomous Region	2012	3		25.5	214.1	131.004	9949	9924	3	3	3	1.5	0.5	2	-0.00251598
16	Yunnan Province	2011	3	7.7	31.87	950	52.4017	9840	11281.2	3	3	3	1.5	0.5	2	0.136686
16	Yunnan Province	2011	3	7.7	31.87	950	104.803	9840	9983.45	3	3	3	1.5	0.5	2	0.014473
16	Yunnan Province	2011	3	7.7	31.87	950	209.607	9840	9985.85	3	3	3	1.5	0.5	2	0.0147134
17	Xinjiang Uygur Autonomous Region	2014	3	8.32	18.6	49.2	32.7511	11240	12200	3	3	3	1.5	0.5	2	0.0819571
17	Xinjiang Uygur Autonomous Region	2014	3	8.32	18.6	49.2	65.5022	11240	13810	3	3	3	1.5	0.5	2	0.205914
17	Xinjiang Uygur Autonomous Region	2014	3	8.32	18.6	49.2	131.004	11240	13890	3	3	3	1.5	0.5	2	0.21169
18	Hebei Province	2010	3		11.2	495.9	34.3886	10878	11472	3	3	3	1.5	0.5	2	0.0531669
18	Hebei Province	2010	3		11.2	495.9	68.7773	10878	12049.5	3	3	3	1.5	0.5	2	0.102281
18	Hebei Province	2010	3		11.2	495.9	103.166	10878	11512.5	3	3	3	1.5	0.5	2	0.056691
18	Hebei Province	2010	3		7.4	495.9	78.6026	9867	10372.5	3	3	3	1.5	0.5	2	0.0499622
18	Hebei Province	2010	3		7.4	495.9	157.205	9867	10741.5	3	3	3	1.5	0.5	2	0.0849189
18	Hebei Province	2010	3		7.4	495.9	235.808	9867	9984	3	3	3	1.5	0.5	2	0.011788
18	Hebei Province	2010	3		6.4	495.9	34.3886	7353	8482.5	3	3	3	1.5	0.5	2	0.142897
18	Hebei Province	2010	3		6.4	495.9	68.7773	7353	8893.5	3	3	3	1.5	0.5	2	0.190212
18	Hebei Province	2010	3		6.4	495.9	103.166	7353	8829	3	3	3	1.5	0.5	2	0.182933
19	Shaanxi Province	2014	3	7.1	7.3	378.3	24.1048	10564.5	10637.4	3	3	3	1.5	0.5	2	0.00687677
19	Shaanxi Province	2014	3	7.1	7.3	378.3	48.2096	10564.5	12088	3	3	3	1.5	0.5	2	0.134718
19	Shaanxi Province	2014	3	7.1	7.3	378.3	72.3144	10564.5	10979.9	3	3	3	1.5	0.5	2	0.0385625
19	Shaanxi Province	2013	3	8.04	24.67	517.7	65.5022	5301	6707	3	3	4	1.5	0.375	2.66667	0.235256
19	Shaanxi Province	2013	3	8.04	24.67	517.7	39.3013	5301	6453	3	3	4	1.5	0.375	2.66667	0.19665
19	Shaanxi Province	2013	3	8.04	24.67	517.7	65.5022	5301	6409	3	3	4	1.5	0.375	2.66667	0.189808
19	Shaanxi Province	2013	3	8.04	24.67	517.7	39.3013	5301	5981	3	3	4	1.5	0.375	2.66667	0.120692
20	Jilin Province	2012	3	6.18	36.23	718.3	74.2358	12284.3	12325.2	3	3	2	1.5	0.75	1.33333	0.00332393
20	Jilin Province	2012	3	6.18	36.23	718.3	148.472	12284.3	12940.3	3	3	2	1.5	0.75	1.33333	0.0520229
21	Guizhou Province	2014	3		N/A	1284.4	74.2358	7099.5	8374.5	3	3	3	1.5	0.5	2	0.165167
21	Guizhou Province	2014	3		N/A	1284.4	148.472	7099.5	9300	3	3	3	1.5	0.5	2	0.26999
21	Guizhou Province	2014	3		N/A	1284.4	98.2533	7099.5	8599.5	3	3	3	1.5	0.5	2	0.19168
22	Shanxi Province	2014	3	8.6	9.8	432.1	26.2009	3550	4297	3	3	3	1.5	0.5	2	0.19097
22	Shanxi Province	2014	3	8.6	9.8	432.1	52.4017	3550	4682	3	3	3	1.5	0.5	2	0.276778
22	Shanxi Province	2014	3	8.6	9.8	432.1	78.6026	3550	4908	3	3	3	1.5	0.5	2	0.323919
23	Guizhou Province	2013	3	6.9	29.6	1300	29.476	6960	6888	3	3	3	1.5	0.5	2	-0.0103987
23	Guizhou Province	2013	3	6.9	29.6	1300	58.952	6960	7297.5	3	3	3	1.5	0.5	2	0.0473523
23	Guizhou Province	2013	3	6.9	29.6	1300	88.4279	6960	6564	3	3	3	1.5	0.5	2	-0.0585793
24	Jiangsu Province	2012	3	N/A	N/A	1058.4	23.5808	8066.25	9275.55	3	3	4	1.5	0.375	2.66667	0.139693
24	Jiangsu Province	2012	3	N/A	N/A	1058.4	31.441	8066.25	9388.05	3	3	4	1.5	0.375	2.66667	0.151749
24	Jiangsu Province	2012	3	N/A	N/A	1058.4	39.3013	8066.25	9863.1	3	3	4	1.5	0.375	2.66667	0.201112
24	Jiangsu Province	2012	3	N/A	N/A	1058.4	47.1616	8066.25	9225.45	3	3	4	1.5	0.375	2.66667	0.134277
25	Anhui Province	2014	3	6.5	19	912.2	19.6507	6033.5	6333	3	3	4	1.5	0.375	2.66667	0.0484468
25	Anhui Province	2014	3	6.5	19	912.2	39.3013	6033.5	6383.33	3	3	2	1.5	0.75	1.33333	0.0563632
25	Anhui Province	2014	3	6.5	19	912.2	78.6026	6033.5	6183.5	3	3	2	1.5	0.75	1.33333	0.0245572
25	Anhui Province	2014	3	6.5	19	912.2	39.3013	5533.5	5800	3	3	2	1.5	0.75	1.33333	0.0470374
25	Anhui Province	2014	3	6.5	19	912.2	39.3013	5533.5	5850	3	3	2	1.5	0.75	1.33333	0.0556211
26	Heilongjiang Province	2012	3	7.61	10	631.5	19.6507	7111.5	8629.5	3	3	4	1.5	0.375	2.66667	0.193473
26	Heilongjiang Province	2012	3	7.61	10	631.5	39.3013	7111.5	9460.5	3	3	4	1.5	0.375	2.66667	0.285412
26	Heilongjiang Province	2012	3	7.61	10	631.5	58.952	7111.5	8722.5	3	3	4	1.5	0.375	2.66667	0.204193
26	Heilongjiang Province	2012	3	7.61	10	631.5	78.6026	7111.5	7797	3	3	4	1.5	0.375	2.66667	0.0920259
27	Xinjiang Uygur Autonomous Region	2011	3	8.32	18.48	201.7	32.7511	14620	16809	3	3	3	1.5	0.5	2	0.139524
27	Xinjiang Uygur Autonomous Region	2011	3	8.32	18.48	201.7	65.5022	14620	17711	3	3	3	1.5	0.5	2	0.191795
27	Xinjiang Uygur Autonomous Region	2011	3	8.32	18.48	201.7	131.004	14620	16539	3	3	3	1.5	0.5	2	0.123331
28	Heilongjiang Province	2013	3	7.4	12.8	624.6	32.7511	6844.5	8046	3	3	4	1.5	0.375	2.66667	0.16173
28	Heilongjiang Province	2013	3	7.4	12.8	624.6	65.5022	6844.5	9408	3	3	4	1.5	0.375	2.66667	0.318115
28	Heilongjiang Province	2013	3	7.4	12.8	624.6	98.2533	6844.5	8857.5	3	3	4	1.5	0.375	2.66667	0.257819
28	Heilongjiang Province	2013	3	7.4	12.8	624.6	131.004	6844.5	7918.5	3	3	4	1.5	0.375	2.66667	0.145756
29	Guangxi Zhuang Autonomous Region	2011	3	5.4	14	1300	32.7511	4649.6	4813.6	3	3	4	1.5	0.375	2.66667	0.0346641
29	Guangxi Zhuang Autonomous Region	2011	3	5.4	14	1300	65.5022	4649.6	4985.1	3	3	4	1.5	0.375	2.66667	0.0696723
29	Guangxi Zhuang Autonomous Region	2011	3	5.4	14	1300	131.004	4649.6	5033.5	3	3	4	1.5	0.375	2.66667	0.0793344
29	Guangxi Zhuang Autonomous Region	2011	3	5.4	14	1300	262.009	4649.6	4951.5	3	3	4	1.5	0.375	2.66667	0.0629094
29	Guangxi Zhuang Autonomous Region	2011	3	5.4	14	1300	32.7511	3213.5	3425	3	3	4	1.5	0.375	2.66667	0.0637408
29	Guangxi Zhuang Autonomous Region	2011	3	5.4	14	1300	65.5022	3213.5	3555.5	3	3	4	1.5	0.375	2.66667	0.101135
29	Guangxi Zhuang Autonomous Region	2011	3	5.4	14	1300	131.004	3213.5	3617.6	3	3	4	1.5	0.375	2.66667	0.11845
29	Guangxi Zhuang Autonomous Region	2011	3	5.4	14	1300	262.009	3213.5	3502.7	3	3	4	1.5	0.375	2.66667	0.0861734
29	Guangxi Zhuang Autonomous Region	2012	3	8.18	16.16	584.1	52.4017	9152.27	11500.4	3	3	3	1.5	0.5	2	0.228378
29	Guangxi Zhuang Autonomous Region	2012	3	8.18	16.16	584.1	104.803	9152.27	10597.2	3	3	3	1.5	0.5	2	0.146584
29	Guangxi Zhuang Autonomous Region	2012	3	8.18	16.16	584.1	209.607	9152.27	9919.89	3	3	3	1.5	0.5	2	0.0805399
30	Ningxia Hui Autonomous Region	2013	3	8.05	6.6	215.6	19.6507	8115.5	9207.7	3	3	4	1.5	0.375	2.66667	0.126264
30	Ningxia Hui Autonomous Region	2013	3	8.05	6.6	215.6	39.3013	8115.5	9784.6	3	3	4	1.5	0.375	2.66667	0.187034
30	Ningxia Hui Autonomous Region	2013	3	8.05	6.6	215.6	58.952	8115.5	9184.6	3	3	4	1.5	0.375	2.66667	0.123752
30	Ningxia Hui Autonomous Region	2013	3	8.05	6.6	215.6	78.6026	8115.5	8746.2	3	3	4	1.5	0.375	2.66667	0.0748435
31	Ningxia Hui Autonomous Region	2012	3	8.14	6.04	650	19.6507	5127.9	5674.92	3	3	3	1.5	0.5	2	0.101361
31	Ningxia Hui Autonomous Region	2012	3	8.14	6.04	650	39.3013	5127.9	6218.53	3	3	3	1.5	0.5	2	0.192838
31	Ningxia Hui Autonomous Region	2012	3	8.14	6.04	650	58.952	5127.9	6932.73	3	3	3	1.5	0.5	2	0.301557
32	Gansu province	2010	3	8.25	N/A	390	21.8341	7211.2	7678	3	3	4	1.5	0.375	2.66667	0.0627237
32	Gansu province	2010	3	8.25	N/A	390	43.6681	7211.2	7824.5	3	3	4	1.5	0.375	2.66667	0.0816245
32	Gansu province	2010	3	8.25	N/A	390	65.5022	7211.2	8103.2	3	3	4	1.5	0.375	2.66667	0.116624
32	Gansu province	2010	3	8.25	N/A	390	87.3362	7211.2	8194.5	3	3	4	1.5	0.375	2.66667	0.127828
33	Inner Mongolia Autonomous Region	2012	3	7.7	16.85	213	65.5022	13116.4	13487	3	3	3	1.5	0.5	2	0.0278667
33	Inner Mongolia Autonomous Region	2012	3	7.7	16.85	213	131.004	13116.4	14281	3	3	3	1.5	0.5	2	0.0850704
33	Inner Mongolia Autonomous Region	2012	3	7.7	16.85	213	262.009	13116.4	13129	3	3	3	1.5	0.5	2	0.00096398
34	Ningxia Hui Autonomous Region	2012	3	8.05	21.1	215.6	19.6507	10201	11427	3	3	4	1.5	0.375	2.66667	0.113493
34	Ningxia Hui Autonomous Region	2012	3	8.05	21.1	215.6	39.3013	10201	12512	3	3	4	1.5	0.375	2.66667	0.204202
34	Ningxia Hui Autonomous Region	2012	3	8.05	21.1	215.6	58.952	10201	14268	3	3	4	1.5	0.375	2.66667	0.335534
34	Ningxia Hui Autonomous Region	2012	3	8.05	21.1	215.6	78.6026	10201	14544	3	3	4	1.5	0.375	2.66667	0.354693
35	Henan Province	2012	3	7.5	4.9	401.7	21.8341	3435.42	3721.19	3	3		1.5	#DIV/0!	#DIV/0!	0.0799043
35	Henan Province	2012	3	7.5	4.9	401.7	43.6681	3435.42	4423.05	3	3	2	1.5	0.75	1.33333	0.25269
35	Henan Province	2012	3	7.5	4.9	401.7	87.3362	3435.42	4925.83	3	3	2	1.5	0.75	1.33333	0.360354
35	Henan Province	2012	3	7.5	4.9	401.7	21.8341	4501.54	5221.38	3	3	3	1.5	0.5	2	0.148342
35	Henan Province	2012	3	7.5	4.9	401.7	43.6681	4501.54	5724.27	3	3	3	1.5	0.5	2	0.240295
35	Henan Province	2012	3	7.5	4.9	401.7	87.3362	4501.54	6082.53	3	3	3	1.5	0.5	2	0.301001
36	Inner Mongolia Autonomous Region	2010	3	8	10.81	399.1	43.6681	12300	13352	3	3	6	1.5	0.25	4	0.0820669
36	Inner Mongolia Autonomous Region	2010	3	8	10.81	399.1	65.5022	12300	14117	3	3	6	1.5	0.25	4	0.13778
36	Inner Mongolia Autonomous Region	2010	3	8	10.81	399.1	87.3362	12300	14732	3	3	6	1.5	0.25	4	0.180423
36	Inner Mongolia Autonomous Region	2010	3	8	10.81	399.1	43.6681	12300	14296	3	3	6	1.5	0.25	4	0.150381
36	Inner Mongolia Autonomous Region	2010	3	8	10.81	399.1	65.5022	12300	14769	3	3	6	1.5	0.25	4	0.182931
36	Inner Mongolia Autonomous Region	2010	3	8	10.81	399.1	87.3362	12300	14953	3	3	6	1.5	0.25	4	0.195313
37	Fujian Province	2011	3	5.9	46.6	1374.4	18.3406	977.876	983.432	3	3	3	1.5	0.5	2	0.00566574
37	Fujian Province	2011	3	5.9	46.6	1374.4	26.2009	977.876	1000.1	3	3	3	1.5	0.5	2	0.0224729
37	Fujian Province	2011	3	5.9	46.6	1374.4	34.0611	977.876	977.876	3	3	3	1.5	0.5	2	0
38	Ningxia Hui Autonomous Region	2012	3	7.54	9.1	449.6	19.6507	8635.04	8965.92	3	3	4	1.5	0.375	2.66667	0.0376019
38	Ningxia Hui Autonomous Region	2012	3	7.54	9.1	449.6	39.3013	8635.04	9165.65	3	3	4	1.5	0.375	2.66667	0.0596346
38	Ningxia Hui Autonomous Region	2012	3	7.54	9.1	449.6	58.952	8635.04	9627.67	3	3	4	1.5	0.375	2.66667	0.108812
38	Ningxia Hui Autonomous Region	2012	3	7.54	9.1	449.6	78.6026	8635.04	9893.98	3	3	4	1.5	0.375	2.66667	0.136098
39	Gansu province	2012	3	N/A	27.7	453.6	23.5808	8735	9077.5	3	3	3	1.5	0.5	2	0.0384609
39	Gansu province	2012	3	N/A	27.7	453.6	47.1616	8735	9205	3	3	3	1.5	0.5	2	0.0524089
39	Gansu province	2012	3	N/A	27.7	453.6	70.7424	8735	9165	3	3	3	1.5	0.5	2	0.0480539
40	Guizhou Province	2010	3	N/A	N/A	1114	32.7511	8746	7908	3	3	3	1.5	0.5	2	-0.100722
40	Guizhou Province	2010	3	N/A	N/A	1114	65.5022	8746	8876.25	3	3	3	1.5	0.5	2	0.0147827
40	Guizhou Province	2010	3	N/A	N/A	1114	98.2533	8746	8553.75	3	3	3	1.5	0.5	2	-0.0222267
41	Hebei Province	2011	3	7.3	9.6	494	10.917	3180	4120	3	3	5	1.5	0.3	3.33333	0.258972
41	Hebei Province	2011	3	7.3	9.6	494	21.8341	3180	4420	3	3	5	1.5	0.3	3.33333	0.329258
41	Hebei Province	2011	3	7.3	9.6	494	43.6681	3180	5240	3	3	5	1.5	0.3	3.33333	0.49944
41	Hebei Province	2011	3	7.3	9.6	494	87.3362	3180	5920	3	3	5	1.5	0.3	3.33333	0.621455
41	Hebei Province	2011	3	7.3	9.6	494	174.672	3180	5660	3	3	5	1.5	0.3	3.33333	0.576543
42	Sichuan Province	2011	3	N/A	15.4	1222.1	15.7205	4319	5842.5	3	3	3	1.5	0.5	2	0.302135
42	Sichuan Province	2011	3	N/A	15.4	1222.1	31.441	4319	6661.5	3	3	3	1.5	0.5	2	0.433321
42	Sichuan Province	2011	3	N/A	15.4	1222.1	47.1616	4319	6555	3	3	3	1.5	0.5	2	0.417204
43	Henan Province	2009	4	5.8	18.64	854.7	16.3755	6503.4	7028.3	4	4	3	2	0.666667	1.5	0.0776197
43	Henan Province	2009	4	5.8	18.64	854.7	32.7511	6503.4	7313	4	4	3	2	0.666667	1.5	0.117328
43	Henan Province	2009	4	5.8	18.64	854.7	49.1266	6503.4	7080.9	4	4	3	2	0.666667	1.5	0.0850759
44	Yunnan Province	2009	4	5.36	16.7	1000	39.3013	6365	9015	4	4	3	2	0.666667	1.5	0.348076
44	Yunnan Province	2009	4	5.36	16.7	1000	78.6026	6365	9345	4	4	3	2	0.666667	1.5	0.384027
44	Yunnan Province	2009	4	5.36	16.7	1000	117.904	6365	9780	4	4	3	2	0.666667	1.5	0.429525
45	Yunnan Province	2010	3	6.52	49.3	705.8	19.6507	7905	7920	3	3	3	1.5	0.5	2	0.00189574
45	Yunnan Province	2010	3	6.52	49.3	705.8	39.3013	7905	7888.5	3	3	3	1.5	0.5	2	-0.00208947
45	Yunnan Province	2010	3	6.52	49.3	705.8	58.952	7905	7920	3	3	3	1.5	0.5	2	0.00189574
46	Liaoning Province	2010	3	5.6	59.4	683.7	13.1004	8688.5	9134.5	3	3	4	1.5	0.375	2.66667	0.0500581
46	Liaoning Province	2010	3	5.6	59.4	683.7	26.2009	8688.5	8970.5	3	3	4	1.5	0.375	2.66667	0.0319411
46	Liaoning Province	2010	3	5.6	59.4	683.7	39.3013	8688.5	9227.5	3	3	4	1.5	0.375	2.66667	0.0601878
46	Liaoning Province	2010	3	5.6	59.4	683.7	52.4017	8688.5	10741	3	3	4	1.5	0.375	2.66667	0.212068
46	Liaoning Province	2010	3	5.6	59.4	683.7	65.5022	8688.5	9410.6	3	3	4	1.5	0.375	2.66667	0.0798364
47	Henan Province	2010	3	N/A	13.95	720.6	19.6507	9468	9741	3	3	3	1.5	0.5	2	0.0284261
47	Henan Province	2010	3	N/A	13.95	720.6	26.2009	9468	10066.5	3	3	3	1.5	0.5	2	0.0612954
47	Henan Province	2010	3	N/A	13.95	720.6	58.952	9468	10047	3	3	3	1.5	0.5	2	0.0593564
48	Heilongjiang Province	2009	3	6.8	17	552.5	13.1004	5311.5	6208.05	3	3	5	1.5	0.3	3.33333	0.155973
48	Heilongjiang Province	2009	3	6.8	17	552.5	26.2009	5311.5	5747.85	3	3	5	1.5	0.3	3.33333	0.0789516
48	Heilongjiang Province	2009	3	6.8	17	552.5	39.3013	5311.5	5894.7	3	3	5	1.5	0.3	3.33333	0.104179
48	Heilongjiang Province	2009	3	6.8	17	552.5	52.4017	5311.5	6669.15	3	3	5	1.5	0.3	3.33333	0.227618
48	Heilongjiang Province	2009	3	6.8	17	552.5	65.5022	5311.5	7319.25	3	3	5	1.5	0.3	3.33333	0.320634
49	Liaoning Province	2008	3	5.23	16.3	661.8	18.3406	8297	10454	3	3	4	1.5	0.375	2.66667	0.231091
49	Liaoning Province	2008	3	5.23	16.3	661.8	36.6812	8297	10572	3	3	4	1.5	0.375	2.66667	0.242315
49	Liaoning Province	2008	3	5.23	16.3	661.8	55.0218	8297	10538	3	3	4	1.5	0.375	2.66667	0.239094
49	Liaoning Province	2008	3	5.23	16.3	661.8	73.3624	8297	9920	3	3	4	1.5	0.375	2.66667	0.178659
49	Liaoning Province	2008	3	5.81	13.9	694.3	15.7205	6824	8496	3	3	4	1.5	0.375	2.66667	0.21915
49	Liaoning Province	2008	3	5.81	13.9	694.3	31.441	6824	9018	3	3	4	1.5	0.375	2.66667	0.278777
49	Liaoning Province	2008	3	5.81	13.9	694.3	47.1616	6824	9509	3	3	4	1.5	0.375	2.66667	0.331793
49	Liaoning Province	2008	3	5.81	13.9	694.3	62.8821	6824	9153	3	3	4	1.5	0.375	2.66667	0.293636
49	Liaoning Province	2008	3	8.08	18.7	450.2	15.7205	8508	8783	3	3	4	1.5	0.375	2.66667	0.0318111
49	Liaoning Province	2008	3	8.08	18.7	450.2	31.441	8508	9460	3	3	4	1.5	0.375	2.66667	0.106065
49	Liaoning Province	2008	3	8.08	18.7	450.2	47.1616	8508	9654	3	3	4	1.5	0.375	2.66667	0.126365
49	Liaoning Province	2008	3	8.08	18.7	450.2	62.8821	8508	9528	3	3	4	1.5	0.375	2.66667	0.113228
50	Guizhou Province	2006	3	N/A	N/A	881.5	32.7511	6562.5	6712.5	3	3	3	1.5	0.5	2	0.0225998
50	Guizhou Province	2006	3	N/A	N/A	881.5	65.5022	6562.5	7890	3	3	3	1.5	0.5	2	0.184225
50	Guizhou Province	2006	3	N/A	N/A	881.5	98.2533	6562.5	7578	3	3	3	1.5	0.5	2	0.143878
51	Heilongjiang Province	2008	3	5.43	33.1	439	22.9258	7728	8460	3	3	1	1.5	1.5	0.666667	0.0904991
51	Heilongjiang Province	2008	3	8.51	7.5	466	22.9258	6974	8979	3	3	1	1.5	1.5	0.666667	0.2527
52	Shanxi Province	2008	3	N/A	31	550	26.2009	5761.5	5260.5	3	3	3	1.5	0.5	2	-0.0909718
52	Shanxi Province	2008	3	N/A	31	550	52.4017	5761.5	5511	3	3	3	1.5	0.5	2	-0.0444518
52	Shanxi Province	2008	3	N/A	31	550	78.6026	5761.5	5761.5	3	3	3	1.5	0.5	2	0
53	Heilongjiang Province	2009	4	6.8	39.7	450.7	26.2009	3812.5	4329.2	4	4	3	2	0.666667	1.5	0.127098
53	Heilongjiang Province	2009	4	6.8	39.7	450.7	52.4017	3812.5	4204.2	4	4	3	2	0.666667	1.5	0.0977989
53	Heilongjiang Province	2009	4	6.8	39.7	450.7	65.5022	3812.5	3866.7	4	4	3	2	0.666667	1.5	0.0141163
54	Guizhou Province	2007	3	6	17.6	1303.4	29.476	7515.15	8123.7	3	3	3	1.5	0.5	2	0.0778647
54	Guizhou Province	2007	3	6	17.6	1303.4	58.952	7515.15	7988.1	3	3	3	1.5	0.5	2	0.061032
54	Guizhou Province	2007	3	6	17.6	1303.4	88.4279	7515.15	7894.35	3	3	3	1.5	0.5	2	0.0492263
55	Shandong Province	2007	3	5.4	12.5	807.5	13.1004	7609.5	9381	3	3	3	1.5	0.5	2	0.209289
55	Shandong Province	2007	3	5.4	12.5	807.5	26.2009	7609.5	10344	3	3	3	1.5	0.5	2	0.307009
55	Shandong Province	2007	3	5.4	12.5	807.5	39.3013	7609.5	9927	3	3	3	1.5	0.5	2	0.265861
56	Hebei Province	2007	4	7.91	14.4	501.4	19.6507	9300.5	10435.1	4	4	3	2	0.666667	1.5	0.115107
56	Hebei Province	2007	4	7.91	14.4	501.4	39.3013	9300.5	11231.6	4	4	3	2	0.666667	1.5	0.188663
56	Hebei Province	2007	4	7.91	14.4	501.4	58.952	9300.5	10477	4	4	3	2	0.666667	1.5	0.119114
57	Shaanxi Province	2007	3	7.75	45.61	522.25	26.2009	4875	6140	3	3	3	1.5	0.5	2	0.230705
57	Shaanxi Province	2007	3	7.75	45.61	522.25	52.4017	4875	6534	3	3	3	1.5	0.5	2	0.292899
57	Shaanxi Province	2007	3	7.75	45.61	522.25	78.6026	4875	6270	3	3	3	1.5	0.5	2	0.251656
58	Jilin Province	2007	3	N/A	16.7	693.7	13.1004	8461.5	10098	3	3	3	1.5	0.5	2	0.176811
58	Jilin Province	2007	3	N/A	16.7	693.7	26.2009	8461.5	10113	3	3	3	1.5	0.5	2	0.178295
58	Jilin Province	2007	3	N/A	16.7	693.7	39.3013	8461.5	10117.5	3	3	3	1.5	0.5	2	0.17874
59	Xinjiang Uygur Autonomous Region	1991	3	8.1	3.9	105.7	13.1004	6284	6795	3	3	1	1.5	1.5	0.666667	0.0781803
59	Xinjiang Uygur Autonomous Region	1992	3	8.2	4.6	318	14.3231	2265	4156	3	3	1	1.5	1.5	0.666667	0.606978
59	Xinjiang Uygur Autonomous Region	1992	3	8.3	26.5	692.6	17.4672	3814	6195	3	3	1	1.5	1.5	0.666667	0.485064
59	Xinjiang Uygur Autonomous Region	1992	3	8.6	9.57	1500	10.7424	4018	6315	3	3	1	1.5	1.5	0.666667	0.452143
60	Anhui Province	2005	3	8.4	10.8	1119.2	23.5808	7785	8130	3	3	3	1.5	0.5	2	0.0433621
60	Anhui Province	2005	3	8.4	10.8	1119.2	47.1616	7785	8970	3	3	3	1.5	0.5	2	0.141687
60	Anhui Province	2005	3	8.4	10.8	1119.2	73.69	7785	8850	3	3	3	1.5	0.5	2	0.128219
61	Guizhou Province	2006	3	6.5	2.18	881.5	29.476	5653.5	7729.5	3	3	3	1.5	0.5	2	0.312769
61	Guizhou Province	2006	3	6.5	2.18	881.5	58.952	5653.5	8854.5	3	3	3	1.5	0.5	2	0.448651
61	Guizhou Province	2006	3	6.5	2.18	881.5	88.4279	5653.5	8779.5	3	3	3	1.5	0.5	2	0.440145
62	Guangdong Province	1992	3	5.95	55	1853.4	32.7511	6243.9	8424.75	3	3	2	1.5	0.75	1.33333	0.299569
62	Guangdong Province	1992	3	5.95	55	1853.4	65.5022	6243.9	7716.3	3	3	2	1.5	0.75	1.33333	0.21173
63	Henan Province	1990	3	8.65	10.6	N/A	26.2009	1377.66	5845.74	3	3	1	1.5	1.5	0.666667	1.44533
63	Henan Province	1991	3	8.65	10.6	N/A	26.2009	651.596	4859.04	3	3	1	1.5	1.5	0.666667	2.00917
64	Gansu province	2007	3	7.8	23.4	450.4	58.952	17254.4	17332.9	3	3	3	1.5	0.5	2	0.00453925
64	Gansu province	2007	3	7.8	23.4	450.4	76.4192	17254.4	17202	3	3	3	1.5	0.5	2	-0.00304153
64	Gansu province	2007	3	7.8	23.4	450.4	179.039	17254.4	17233	3	3	3	1.5	0.5	2	-0.00124103
65	Gansu province	2009	3	N/A	N/A	N/A	19.6507	8832	9555	3	3	3	1.5	0.5	2	0.0786831
65	Gansu province	2009	3	N/A	N/A	N/A	39.3013	8832	10695	3	3	3	1.5	0.5	2	0.191395
65	Gansu province	2009	3	N/A	N/A	N/A	58.952	8832	9702	3	3	3	1.5	0.5	2	0.0939506
66	Jiangsu Province	2001	3	N/A	3.96	N/A	32.7511	1711.7	1801.8	3	3	2	1.5	0.75	1.33333	0.0512991
66	Jiangsu Province	2001	3	N/A	3.96	N/A	65.5022	1711.7	1861.8	3	3	2	1.5	0.75	1.33333	0.0840567
66	Jiangsu Province	2001	3	N/A	3.96	N/A	32.7511	1645.6	1753.8	3	3	2	1.5	0.75	1.33333	0.0636798
66	Jiangsu Province	2001	3	N/A	3.96	N/A	65.5022	1645.6	1771.8	3	3	2	1.5	0.75	1.33333	0.0738909
67	Yunnan Province	1989	3	6.7	9.2	N/A	44.5415	2490	3420	3	3	1	1.5	1.5	0.666667	0.317358
67	Yunnan Province	1990	3	6.7	9.2	N/A	44.5415	2625	3540	3	3	1	1.5	1.5	0.666667	0.299046
68	Liaoning Province	1980	3	6.42	45	N/A	32.7511	7114.5	7410	3	3	1	1.5	1.5	0.666667	0.0406955
68	Liaoning Province	1981	3	6.42	45	N/A	32.7511	6510	6754.5	3	3	1	1.5	1.5	0.666667	0.0368695
69	Henan Province	1981	3	8	15.9	N/A	52.4017	5889	6339	3	3	1	1.5	1.5	0.666667	0.0736348
69	Henan Province	1982	3	8	15.9	N/A	52.4017	4224	4446	3	3	1	1.5	1.5	0.666667	0.0512223
70	Yunnan Province	1979	3	5.6		N/A	52.4017	1260	3743	3	3	1	1.5	1.5	0.666667	1.08878
70	Yunnan Province	1980	3	5.6		N/A	52.4017	1429	3557	3	3	1	1.5	1.5	0.666667	0.911943
71	Anhui Province	1997	3	6.78	24.9	N/A	32.7511	4319	5436	3	3	1	1.5	1.5	0.666667	0.23002
71	Anhui Province	1998	3	6.78	24.9	N/A	32.7511	2892	3617	3	3	1	1.5	1.5	0.666667	0.223697
72	Liaoning Province	1994	3	N/A	16	N/A	32.7511	8055	8100	3	3	1	1.5	1.5	0.666667	0.00557105
72	Liaoning Province	1995	3	N/A	16	N/A	32.7511	7200	7230	3	3	1	1.5	1.5	0.666667	0.00415801
73	Liaoning Province	1990	3	6.7	10.6	N/A	21.8341	6942	6990	3	3	1	1.5	1.5	0.666667	0.00689064
73	Liaoning Province	1991	3	6.7	10.6	N/A	21.8341	6170	6273	3	3	1	1.5	1.5	0.666667	0.0165559
73	Liaoning Province	1992	3	8.48	11	510	111.354	2801.4	5154.55	3	3	1	1.5	1.5	0.666667	0.60976
73	Liaoning Province	1993	3	8.48	11	510	111.354	2833.57	4679.02	3	3	1	1.5	1.5	0.666667	0.501553
74	Shandong Province	2015	3	7	15.3	N/A	52.4017	6637.5	9711	3	3	3	1.5	0.5	2	0.380524
74	Shandong Province	2015	3	7	15.3	N/A	78.6026	6637.5	8707.5	3	3	3	1.5	0.5	2	0.271449
74	Shandong Province	2015	3	7	15.3	N/A	26.2009	6637.5	8472	3	3	3	1.5	0.5	2	0.244031
75	Shandong Province	2016	3	7.1	14.8	N/A	32.7511	7305	7935	3	3	3	1.5	0.5	2	0.0827243
75	Shandong Province	2016	3	7.1	14.8	N/A	49.1266	7305	7680	3	3	3	1.5	0.5	2	0.0500605
75	Shandong Province	2016	3	7.1	14.8	N/A	16.3755	7305	7635	3	3	3	1.5	0.5	2	0.0441839
76	Guangxi Zhuang Autonomous Region	2015	3	5.6	42.6	N/A	32.7511	7238.9	7466.2	3	3	3	1.5	0.5	2	0.0309169
76	Guangxi Zhuang Autonomous Region	2015	3	5.6	42.6	N/A	49.1266	7238.9	7384.1	3	3	3	1.5	0.5	2	0.0198598
76	Guangxi Zhuang Autonomous Region	2015	3	5.6	42.6	N/A	16.3755	7238.9	7372.1	3	3	3	1.5	0.5	2	0.0182333
77	Henan Province	2007	3	8.26	20.4	N/A	78.6026	7870	9293	3	3	3	1.5	0.5	2	0.166203
77	Henan Province	2007	3	8.26	20.4	N/A	39.3013	7870	8523	3	3	3	1.5	0.5	2	0.0797103
77	Henan Province	2007	3	8.26	20.4	N/A	78.6026	7870	8097	3	3	3	1.5	0.5	2	0.0284356
77	Henan Province	2007	3	8.26	20.4	N/A	39.3013	8237	8450	3	3	1	1.5	1.5	0.666667	0.0255302
78	Henan Province	2010	3	8	7.6	N/A	58.952	7569	8611.5	3	3	1	1.5	1.5	0.666667	0.129038
78	Henan Province	2010	3	8	7.6	N/A	58.952	8125.5	9028.5	3	3	1	1.5	1.5	0.666667	0.105379
78	Henan Province	2010	3	8	7.6	N/A	58.952	8820	9792	3	3	1	1.5	1.5	0.666667	0.104544
78	Henan Province	2010	3	8	7.6	N/A	58.952	8958	9514.5	3	3	1	1.5	1.5	0.666667	0.06027
79	Guizhou Province	2015	3	7.5	14.3	N/A	88.4279	7870.5	8818.5	3	3	3	1.5	0.5	2	0.11373
79	Guizhou Province	2015	3	7.5	14.3	N/A	29.476	7870.5	8731.5	3	3	3	1.5	0.5	2	0.103816
79	Guizhou Province	2015	3	7.5	14.3	N/A	58.952	7870.5	7957.5	3	3	3	1.5	0.5	2	0.0109933
80	Guizhou Province	1987	3	6.2	25.8	N/A	20	5580	6073	3	3	1	1.5	1.5	0.666667	0.0846639
81	Jilin Province	2016	3	5.3	56.8	N/A	45.8515	10605	12936	3	3	3	1.5	0.5	2	0.198689
81	Jilin Province	2016	3	5.3	56.8	N/A	30.5677	10605	15045	3	3	3	1.5	0.5	2	0.34972
81	Jilin Province	2016	3	5.3	56.8	N/A	15.2838	10605	15990	3	3	3	1.5	0.5	2	0.410638
82	Sichuan Province	2009	3	7.2	13	N/A	52.4017	6926.4	9748.8	3	3	3	1.5	0.5	2	0.341804
82	Sichuan Province	2009	3	7.2	13	N/A	26.2009	6926.4	9662.4	3	3	3	1.5	0.5	2	0.332902
82	Sichuan Province	2009	3	7.2	13	N/A	78.6026	6926.4	8668.8	3	3	3	1.5	0.5	2	0.22439
83	Jilin Province	2015	3	5.99	26.2	N/A	96.0699	11097.4	15835.5	3	3	4	1.5	0.375	2.66667	0.355543
83	Jilin Province	2015	3	5.99	26.2	N/A	48.0349	11097.4	15727.5	3	3	4	1.5	0.375	2.66667	0.3487
83	Jilin Province	2015	3	5.99	26.2	N/A	144.105	11097.4	17150	3	3	4	1.5	0.375	2.66667	0.435287
83	Jilin Province	2015	3	5.99	26.2	N/A	24.0175	11097.4	17134.3	3	3	4	1.5	0.375	2.66667	0.434371
84	Jilin Province	2012	3	6.4	26.9	N/A	65.5022	12819.8	15613.6	3	3	4	1.5	0.375	2.66667	0.197151
84	Jilin Province	2012	3	6.4	26.9	N/A	98.2533	12819.8	14825.2	3	3	4	1.5	0.375	2.66667	0.145338
84	Jilin Province	2012	3	6.4	26.9	N/A	32.7511	12819.8	14122.5	3	3	4	1.5	0.375	2.66667	0.0967784
84	Jilin Province	2012	3	6.4	26.9	N/A	131.004	12819.8	13994.1	3	3	4	1.5	0.375	2.66667	0.087645
85	Guangxi Zhuang Autonomous Region	2004	3	6.1	30.4	N/A	47.1616	5458.65	6896.25	3	3	3	1.5	0.5	2	0.233776
85	Guangxi Zhuang Autonomous Region	2004	3	6.1	30.4	N/A	47.1616	6479.55	6979.5	3	3	3	1.5	0.5	2	0.0743262
85	Guangxi Zhuang Autonomous Region	2004	3	6.1	30.4	N/A	47.1616	6187.8	6083.7	3	3	3	1.5	0.5	2	-0.0169665
86	Gansu province	2008	3	8.15	11.6	N/A	98.2533	9512	11682	3	3	3	1.5	0.5	2	0.205495
86	Gansu province	2008	3	8.15	11.6	N/A	65.5022	9512	11292	3	3	3	1.5	0.5	2	0.17154
86	Gansu province	2008	3	8.15	11.6	N/A	32.7511	9512	10235	3	3	3	1.5	0.5	2	0.0732591
87	Shaanxi Province	2007	3	8.3	21.3	N/A	52.4017	4005	8271	3	3	4	1.5	0.375	2.66667	0.725212
87	Shaanxi Province	1983	3	8.6	3.2	N/A	52.4017	4005	5190	3	3	4	1.5	0.375	2.66667	0.25919
87	Shaanxi Province	1983	3	8.6	3.2	N/A	52.4017	4005	4860	3	3	4	1.5	0.375	2.66667	0.193495
87	Shaanxi Province	1983	3	8.6	3.2	N/A	52.4017	4005	4635	3	3	4	1.5	0.375	2.66667	0.146093
88	Shaanxi Province	2013	3	7.81	16.7	N/A	58.952	15043	16475	3	3	1	1.5	1.5	0.666667	0.0909313
89	Guangdong Province	2017	3	6.6	20.3	N/A	81.8777	14817	16653	3	3	3	1.5	0.5	2	0.116815
89	Guangdong Province	2017	3	6.6	20.3	N/A	122.838	14817	16462.5	3	3	3	1.5	0.5	2	0.10531
89	Guangdong Province	2017	3	6.6	20.3	N/A	40.9607	14817	16041	3	3	3	1.5	0.5	2	0.0793728
89	Hunan Province	2013	3	5.2	11.7	N/A	58.952	6403.5	6853.5	3	3	3	1.5	0.5	2	0.0679148
89	Hunan Province	2013	3	5.2	11.7	N/A	39.3013	6403.5	6789	3	3	3	1.5	0.5	2	0.0584589
89	Hunan Province	2013	3	5.2	11.7	N/A	19.6507	6403.5	6703.5	3	3	3	1.5	0.5	2	0.0457851
90	Hubei Province	2011	3	6.7	28	N/A	78.6026	5376	6890	3	3	2	1.5	0.75	1.33333	0.248126
90	Hubei Province	2011	3	7.7	11.3	N/A	78.6026	5565	7097	3	3	2	1.5	0.75	1.33333	0.243175
90	Hubei Province	2011	3	7.7	11.3	N/A	52.4017	5565	6896	3	3	2	1.5	0.75	1.33333	0.214445
90	Hubei Province	2011	3	4.8	12.5	N/A	78.6026	7775	9009	3	3	2	1.5	0.75	1.33333	0.147311
90	Hubei Province	2011	3	7.4	7.1	N/A	52.4017	7346	8361	3	3	2	1.5	0.75	1.33333	0.129422
90	Hubei Province	2011	3	6.7	28	N/A	26.2009	5376	6006	3	3	2	1.5	0.75	1.33333	0.110814
90	Hubei Province	2011	3	7.7	11.3	N/A	26.2009	5565	6204	3	3	2	1.5	0.75	1.33333	0.108697
90	Hubei Province	2011	3	5.5	3.1	N/A	78.6026	8007	8865	3	3	2	1.5	0.75	1.33333	0.101795
90	Hubei Province	2011	3	4.8	12.5	N/A	26.2009	7775	8438	3	3	2	1.5	0.75	1.33333	0.0818319
90	Hubei Province	2011	3	5.5	3.2	N/A	26.2009	6587	7112	3	3	2	1.5	0.75	1.33333	0.0766855
90	Hubei Province	2011	3	6.6	22.8	N/A	52.4017	7658	7989	3	3	2	1.5	0.75	1.33333	0.0423147
90	Hubei Province	2011	3	6.6	22.8	N/A	78.6026	7658	7427	3	3	2	1.5	0.75	1.33333	-0.0306288
91	Shaanxi Province	2016	3	8.3	7.9	N/A	44.5415	11073	11796	3	3	3	1.5	0.5	2	0.0632508
91	Shaanxi Province	2016	3	8.3	7.9	N/A	66.8122	11073	11346	3	3	3	1.5	0.5	2	0.0243555
91	Shaanxi Province	2016	3	8.3	7.9	N/A	22.2707	11073	11244	3	3	3	1.5	0.5	2	0.0153249
92	Shaanxi Province	2016	3	5.7	19.8	N/A	65.5022	10348.2	11200.4	3	3	3	1.5	0.5	2	0.0791324
93	Yunnan Province	2016	3	5.7	19.8	N/A	98.2533	10348.2	11143.2	3	3	3	1.5	0.5	2	0.0740169
93	Yunnan Province	2016	3	5.7	19.8	N/A	32.7511	10348.2	10516	3	3	3	1.5	0.5	2	0.0160901
94	Jilin Province	1980		6.7	N/A	N/A	22.9258	6723.19	6809.57	3	3	1	1.5	1.5	0.666667	0.0127661
94	Jilin Province	1981	3	6.7	N/A	N/A	22.9258	6810.97	6985.04	3	3	1	1.5	1.5	0.666667	0.0252363
95	Beijing	1993	3	8.7	12	N/A	32.7511	1469.26	2903.23	3	3	1	1.5	1.5	0.666667	0.681064
95	Beijing	1992	3	5.7	4.7	N/A	45.8515	1578.95	2993.63	3	3	1	1.5	1.5	0.666667	0.639728
95	Beijing	1993	3	8.7	12	N/A	32.7511	2732.67	4172.03	3	3	1	1.5	1.5	0.666667	0.423124
95	Beijing	1993	3	8.6	9.6	N/A	43.6681	4611.32	6159.54	3	3	1	1.5	1.5	0.666667	0.289488
95	Beijing	1992	3	5.7	4.7	N/A	45.8515	3102.18	3922.26	3	3	1	1.5	1.5	0.666667	0.234564
95	Beijing	1991	3	7.6	20.6	N/A	36.0262	6925.56	8500.28	3	3	1	1.5	1.5	0.666667	0.204879
95	Beijing	2003	3	7.5	51	N/A	32.7511	7777.78	9482.66	3	3	1	1.5	1.5	0.666667	0.198194
95	Beijing	1986	3	5.6	6	N/A	26.2009	864.094	1027.84	3	3	1	1.5	1.5	0.666667	0.17353
95	Beijing	1993	3	8.6	9.6	N/A	24.4541	5217.82	6175.44	3	3	1	1.5	1.5	0.666667	0.1685
95	Beijing	2000	3	7.5	51	N/A	32.7511	4575.16	5398.51	3	3	1	1.5	1.5	0.666667	0.165481
95	Beijing	1992	3	8.7	12	N/A	32.7511	5392.31	6348.85	3	3	1	1.5	1.5	0.666667	0.1633
95	Beijing	1993	3	5.6	6	N/A	26.2009	3810.29	4213.63	3	3	1	1.5	1.5	0.666667	0.100619
95	Beijing	1992	3	8.7	12	N/A	32.7511	5702.58	6258.06	3	3	1	1.5	1.5	0.666667	0.0929523
95	Beijing	1993	3	5.6	6	N/A	26.2009	3720.89	4031.14	3	3	1	1.5	1.5	0.666667	0.080088
95	Beijing	1991	3	8.3	6.5	N/A	40.9607	6709.68	7151.9	3	3	1	1.5	1.5	0.666667	0.063827
95	Beijing	1991	3	7.6	20.6	N/A	36.0262	8214.48	8712.99	3	3	1	1.5	1.5	0.666667	0.0589162
95	Beijing	1991	3	8.1	3.4	N/A	26.2009	8703.67	9102.68	3	3	1	1.5	1.5	0.666667	0.044824
95	Beijing	1982	3	7.5	51	N/A	32.7511	7353.51	7680.41	3	3	1	1.5	1.5	0.666667	0.0434958
95	Beijing	1991	3	8.3	6.5	N/A	40.9607	6644.07	6816.94	3	3	1	1.5	1.5	0.666667	0.0256864
95	Beijing	1997	3	8.1	3.4	N/A	15.7205	5978.42	6085.72	3	3	1	1.5	1.5	0.666667	0.017788
95	Beijing	1986	3	5.6	6	N/A	26.2009	3509.93	3497.79	3	3	1	1.5	1.5	0.666667	-0.00346672
95	Beijing	1982	3	7.5	51	N/A	32.7511	7385.62	7263.37	3	3	1	1.5	1.5	0.666667	-0.0166908
95	Beijing	1991	3	8.1	3.4	N/A	26.2009	8039.22	7884.62	3	3	1	1.5	1.5	0.666667	-0.0194181
95	Beijing	1981	3	8	12	N/A	21.8341	7010.33	6812.5	3	3	1	1.5	1.5	0.666667	-0.0286253
95	Beijing	1997	3	8.1	3.4	N/A	15.7205	6339.87	6025.64	3	3	1	1.5	1.5	0.666667	-0.0508343
96	Tianjin	1990	3	N/A	4.5	N/A	26.2009	4672.2	4851	3	3	1	1.5	1.5	0.666667	0.0375548
96	Tianjin	1990	3	N/A	4.5	N/A	26.2009	4933.5	4741.5	3	3	1	1.5	1.5	0.666667	-0.0396951
96	Tianjin	1990	3	N/A	4.5	N/A	52.4017	4933.5	6373.5	3	3	2	1.5	0.75	1.33333	0.2561
96	Tianjin	1990	3	N/A	4.5	N/A	78.6026	4933.5	6972	3	3	2	1.5	0.75	1.33333	0.345853
96	Tianjin	1990	3	N/A	4.5	N/A	26.2009	4938	7071	3	3	3	1.5	0.5	2	0.359042
96	Tianjin	1990	3	N/A	4.5	N/A	52.4017	4938	7659	3	3	3	1.5	0.5	2	0.438921
96	Tianjin	1990	3	N/A	4.5	N/A	78.6026	4938	7917	3	3	3	1.5	0.5	2	0.472052
96	Tianjin	1990	3	N/A	4.5	N/A	26.2009	6552	7327.5	3	3	3	1.5	0.5	2	0.111864
96	Tianjin	1990	3	N/A	4.5	N/A	52.4017	6552	7635.3	3	3	3	1.5	0.5	2	0.153012
96	Tianjin	1990	3	N/A	4.5	N/A	78.6026	6552	8049	3	3	3	1.5	0.5	2	0.205778
97	Tianjin	1998	3	8.7	8.5	N/A	19.6507	6300	6420	3	3	4	1.5	0.375	2.66667	0.0188685
97	Tianjin	1998	3	8.7	8.5	N/A	30.131	6300	6660	3	3	4	1.5	0.375	2.66667	0.0555699
97	Tianjin	1998	3	8.7	8.5	N/A	40.6114	6300	7290	3	3	4	1.5	0.375	2.66667	0.145954
97	Tianjin	1998	3	8.7	8.5	N/A	51.0917	6300	7419	3	3	4	1.5	0.375	2.66667	0.163495
97	Tianjin	1998	3	8.7	8.5	N/A	61.5721	6300	7545	3	3	4	1.5	0.375	2.66667	0.180335
98	Jilin Province	2003	3	5.3	16	N/A	19.6507	7542.85	7600	3	3	4	1.5	0.375	2.66667	0.00754815
98	Jilin Province	2003	3	5.3	16	N/A	74.2358	7542.85	7885.71	3	3	4	1.5	0.375	2.66667	0.0444522
98	Jilin Province	2003	3	5.3	16	N/A	45.8515	7542.85	7657.14	3	3	4	1.5	0.375	2.66667	0.0150385
98	Jilin Province	2003	3	5.3	16	N/A	58.952	7542.85	7600	3	3	4	1.5	0.375	2.66667	0.00754815
98	Jilin Province	2003	3	5.3	16	N/A	19.6507	8800	8857.14	3	3	4	1.5	0.375	2.66667	0.00647219
98	Jilin Province	2003	3	5.3	16	N/A	32.7511	8800	9142.86	3	3	4	1.5	0.375	2.66667	0.0382215
98	Jilin Province	2003	3	5.3	16	N/A	45.8515	8800	9028.57	3	3	4	1.5	0.375	2.66667	0.0256423
98	Jilin Province	2003	3	5.3	16	N/A	58.952	8800	8971.43	3	3	4	1.5	0.375	2.66667	0.0192934
99	Beijing	1996	3	7.5	6	600	29.476	3148	3000	3	3	2	1.5	0.75	1.33333	-0.048155
99	Beijing	1996	3	7.5	6	600	58.952	3148	3073	3	3	2	1.5	0.75	1.33333	-0.024113
99	Beijing	1996	3	7.5	6	600	29.476	4097	5181	3	3	2	1.5	0.75	1.33333	0.234743
99	Beijing	1996	3	7.5	6	600	58.952	4097	5358	3	3	2	1.5	0.75	1.33333	0.268336
99	Beijing	1996	3	7.5	6	600	29.476	3767	4985	3	3	2	1.5	0.75	1.33333	0.280154
99	Beijing	1996	3	7.5	6	600	58.952	3767	6138	3	3	2	1.5	0.75	1.33333	0.48822
99	Beijing	1996	3	7.5	6	600	29.476	3513	4727	3	3	2	1.5	0.75	1.33333	0.29682
99	Beijing	1996	3	7.5	6	600	58.952	3513	5622	3	3	2	1.5	0.75	1.33333	0.470217
99	Beijing	1996	3	7.5	6	600	29.476	3743	7370	3	3	2	1.5	0.75	1.33333	0.67753
99	Beijing	1996	3	7.5	6	600	58.952	3743	6110	3	3	2	1.5	0.75	1.33333	0.490039
99	Beijing	1996	3	7.5	6	600	29.476	3846	6610	3	3	2	1.5	0.75	1.33333	0.54155
99	Beijing	1996	3	7.5	6	600	58.952	3846	6229	3	3	2	1.5	0.75	1.33333	0.482182
99	Beijing	1996	3	7.5	6	600	29.476	4702	3673	3	3	2	1.5	0.75	1.33333	-0.246979
99	Beijing	1996	3	7.5	6	600	58.952	4702	4072	3	3	2	1.5	0.75	1.33333	-0.143854
99	Beijing	1996	3	7.5	6	600	29.476	5451	5941	3	3	2	1.5	0.75	1.33333	0.0860784
99	Beijing	1996	3	7.5	6	600	58.952	5451	6597	3	3	2	1.5	0.75	1.33333	0.190816
99	Beijing	1996	3	7.5	6	600	67.6856	5586	5561	3	3	2	1.5	0.75	1.33333	-0.00448552
99	Beijing	1996	3	7.5	6	600	58.952	5586	6543	3	3	2	1.5	0.75	1.33333	0.158132
99	Beijing	1996	3	7.5	6	600	29.476	5335	6272	3	3	2	1.5	0.75	1.33333	0.161806
99	Beijing	1996	3	7.5	6	600	58.952	5335	6019	3	3	2	1.5	0.75	1.33333	0.120632
99	Beijing	1996	3	7.5	6	600	29.476	6287	6896	3	3	2	1.5	0.75	1.33333	0.0924575
99	Beijing	1996	3	7.5	6	600	58.952	6287	6407	3	3	2	1.5	0.75	1.33333	0.0189071
99	Beijing	1996	3	7.5	6	600	29.476	6082	6318	3	3	2	1.5	0.75	1.33333	0.0380691
99	Beijing	1996	3	7.5	6	600	58.952	6082	6182	3	3	2	1.5	0.75	1.33333	0.0163083
100	Liaoning Province	1991	3	6.7	10.6	N/A	10.917	6210	7480	3	3	1	1.5	1.5	0.666667	0.186072
100	Liaoning Province	1992	3	6.7	10.6	N/A	10.917	8359	9007	3	3	1	1.5	1.5	0.666667	0.0746633
101	Liaoning Province	2021

## Sheet: Ch. Reference
NO	First Author	Publication year	Title
1	Xiong Hanfeng et al.	2018	Study on the effect of sweet corn NPK based on "3414" mode
2	Li Xu et al.	2018	Study on Effects of Corn Nitrogen, Phosphorus and Potassium Based on "3414" Experiment Design
3	Zhang Lianya	2018	Effects of Phosphorus Fertilizers of Different Types on Phosphorus Absorption and Utilization Efficiency of Red Soil Corn
4	Wei Zhang et al.	2018	The role of phosphorus supply in maximizing the leaf area, photosynthetic rate, coordinated to grain yield of summer maize
5	Hou Yunpeng et al.	2017	Effects of Different Phosphorus Application Levels on Spring Maize Yield, Nutrient Uptake and Transshipment
5	Hua Wei et al.	2017	Effects of nitrogen and phosphorus interaction on spring maize yield and nitrogen absorption and accumulation
7	Huang Yan et al.	2018	Effects of precipitation and phosphorus application on maize yield and phosphorus absorption and utilization in black soil area
8	Yang Junlan et al.	2017	Establishment of optimized fertilization model for corn and determination of fertilization parameters
9	Lu Zhengwu et al.	2016	The relationship between the application amount of phosphate fertilizer and the yield and output value of maize in dry land of southern Hunan
10	Zhu Conghua et al.	2016	Effects of combined application of silicon and phosphorus on dry matter accumulation, distribution and yield of spring maize in low phosphorus soil
11	Zhang Jie et al.	2015	Effects and economic benefits of nitrogen, phosphorus and potassium of spring maize based on "3414" model in Xiliaohe Plain
12	Tang Wenxue et al.	2016	Effects of Phosphorus Application Rate on Soil Available Phosphorus and Phosphate Fertilizer Utilization Rate of Corn Mulching with Double Film Furrow and Sowing in Dryland
13	Kai Liu et al.	2016	Effect of phosphorus application on yield and phosphorus utilization of high-yield summer maize
14	Kang Xuan et al.	2016	Experimental Study on "3414" Fertilization of Soil Testing of Sweet Corn in Huicheng District of Huizhou City
15	Huang Xingfa et al.	2016	Experimental Study on the Suitable Fertilizer Amount of Spring Corn under Drip Irrigation under Film Irrigation in Ningxia Yellow River Irrigation Area
16	Sun Heng et al.	2015	Effects of Phosphate Fertilizer Application Rate on Maize Yield, Soil Inorganic Phosphorus and Phosphate Fertilizer Utilization Rate
17	Chai Ying	2015	Effects of different nitrogen and phosphorus combined application on nutrient absorption and yield of spring maize
18	Liu Jianping et al.	2015	Experimental Study on "3414" Fertilizer Efficiency of Spring Maize No.1 in Yuxian County
19	Zhao Zhenbiao et al.	2015	Fertilizer Efficiency Experiment of Dry Farming Corn "3414" in Dingbian County, Shaanxi Province in 2014
20	Peng Taotao et al.	2015	Effects of Different Phosphorus Application Rates on Growth and Yield of Corn in High Phosphorus Soil
21	Shi Shunyi et al.	2015	Summary of 2014 corn "3414" fertilizer field trials in Xihe Town, Meitan County
22	Zhang Huiqi et al.	2015	Study on the Optimum Fertilization Effect of Maize under Saline-Alkali Condition in Datong Basin
23	Peng Hua et al.	2015	Study on the Effect of Fertilizer and Fertilizer on Maize Soil Testing Formula
24	Wang Mei'e et al.	2015	Effects of Different Phosphate Fertilizer Application Rate on Rice Population and Yield
25	Zhu Hongbin et al.	2014	Effects of Different Phosphate Fertilizer Strategies on Growth and Yield of Shajiang Black Soil Corn
26	Zhang Dejun et al.	2014	Experimental Study on Applying Phosphate Fertilizer to Spring Maize in Zhaoyuan County
27	Zhao Liang et al.	2014	Effect of Phosphate Fertilizer Application Rate on Soil Available Phosphorus, Corn Yield and Nutrient Uptake
28	Gao Yuan et al.	2014	Experimental Research on Applying Phosphate Fertilizer to Corn in Qinggang County
29	Ou Huiping	2014	Effects of Applying Calcium, Magnesium and Phosphate Fertilizers on Maize Yield and Cadmium Accumulation in Typical Red Soil Dryland of Guangxi
30	Cheng fangyuan	2014	Primary report on the experiment of different fertilizer application rates of maize phosphate fertilizer
31	Ma Fuqin et al.	2014	Effect of Phosphate Fertilizer Application Rate on Maize Yield in Cloudy Mountain Area
32	Wang Hongli et al.	2014	Effect of Phosphate Fertilizer Application Rate on Corn Yield and Phosphate Fertilizer Utilization Efficiency of Double Film Ridge Furrow
33	Zhang Jun et al.	2013	Effect of Phosphorus Fertilizer on Maize Yield and Soil Phosphorus Content in Hetao Irrigation District
34	Sun Faguo et al.	2013	Effects of Different Phosphate Fertilizer on Corn Yield
35	Zhang Lihua et al.	2013	Effects of Phosphorus Application on Maize Phosphorus Uptake, Yield and Soil Phosphorus Content and Their Correlation
36	Fan Xiuyan et al.	2013	Effects of Phosphorus Application Methods on Phosphorus Absorption and Utilization of High-yield Spring Maize
37	Dai Chunshan et al.	2013	Preliminary Study on the Optimal Phosphorus Application Rate of Corn
38	Wu Jianhong et al.	2013	Effect of Different Phosphorus Fertilizer Application Rate on Corn Yield
39	Liu Xiaoping et al.	2013	Preliminary report on the experiment of corn formula fertilization in Jingning county
40	Cai Wuzhao et al	2013	Study on the Optimal Fertilizer Application Rate of Corn in Danzhai County
41	Wan Teng et al.	2013	Characterization of root response to phosphorus supply from morphology to gene analysis in feld-grown wheat
42	Shen Xueshan et al.	2012	Study on Effects of Maize Nitrogen, Phosphorus and Potassium Based on "3414" Model in Central Sichuan Hilly Region
43	Chen Shuqiang	2011	Effect of Phosphorus Application Rate on Corn Growth and Yield Components and Quality
44	Wu Xinghong et al.	2011	Experimental Study on Phosphorus Effect of Maize in Dryland of Yunnan Plateau Red Soil
45	Founder	2011	Study on the Effects of Rational Fertilization on Maize Economic Characters, Yield and Benefit
46	Xiao Wanxin et al.	2011	Effects of Different Nitrogen, Phosphorus and Potassium Fertilizer Combinations on Yield and Agronomic Characters of Maize Hybrid'Liaodan 527'
47	Zhang Qingtian et al.	2011	Effects of balanced application of nitrogen, phosphorus and potassium fertilizers on summer maize under high water and fertilizer conditions
48	Sun Yanjie et al.	2011	Effects of combined application of N, P and K fertilizers on maize yield
49	Xing Yuehua et al.	2011	Effect of Different Phosphate Fertilizer Application Rate on Corn Yield, Benefit and Nutrient Absorption
50	Zhang Xiangqin et al.	2011	Study on the Effect of Different Phosphorus Application Rate on Maize Ear Characters and Yield Value
51	Ji Jinghong et al.	2010	Effects of Balanced Fertilization on Maize Yield, Benefits and Soil-Crop System Nutrient Budget
52	l IU Q Ian ping et al.	2010	On the influence of 3414 field experiment on corn yield
53	Wang Fengxian et al.	2010	Study on the effect of fertilization under the condition of maize-soybean rotation in black soil area
54	Yang Maoyun et al.	2009	Effect of combined application of N, P and K fertilizers on the yield of Liaodan 121
55	Cui Xian et al.	2009	Experimental Study on the Effect of Nitrogen, Phosphorus and Potassium Fertilizer on Maize Yield
56	Peng Zhengping et al.	2009	Effects of Different Phosphorus Supply Levels on Corn Dry Matter and Phosphorus Dynamic Accumulation and Distribution
57	Du Hongxia et al.	2009	Effects of phosphorus application on soil nitrate nitrogen and nitrogen absorption characteristics and yield of summer maize
58	Jin Fengxia et al.	2008	Study on Effects of Nitrogen, Phosphorus and Potassium Fertilizers in Corn
59	Xu Tang	2008	Phosphorus efficiency in long-term (15 years) wheat–maize cropping systems with various soil and climate conditions
60	Jiang Yong et al.	2007	Field experiment of summer corn "3414" fertilizer effect
61	Fan Guiguo et al.	2007	Effect of nitrogen, phosphorus and potassium fertilizer application rate on maize yield and benefit
62	Chen Yingqiu et al.	1993	Effects of Amount and Proportion of Nitrogen, Phosphorus and Potassium on Sweet Corn Yield and Quality
63	Cai and Qin et al.	2006	Dynamics of crop yields and soil organic carbon in a long-term fertilization experiment in the Huang-Huai-Hai Plain of China
64	Wang Yanmin et al.	2008	Effects of Different Application of Nitrogen and Phosphorus on Maize Physiological Indexes and Yield in Semi-arid Area of ​​Northwest China
65	Li Jinyan	2010	Effects of Different Application Rates of Nitrogen and Phosphorus Fertilizers on Corn Yield
66	Wu Zhonghua	2009	Effects of Combined Application of Phosphorus and Potassium Fertilizers on the Yield and Group Quality of Spring Corn in High Sandy Land
67	Ditzwar et al.	2002	Effect of Continuous Phosphorus Application on the Yield and Soil Fertility of Mountain Red Soil in Limestone Region
68	Wu Shuo et al.	1996	Study on the Effect of Continuous Cropping Maize and Long-term Fertilization
69	Zhang Xiang et al.	1997	Effects of combined application of organic and inorganic fertilizers on corn grain quality and productivity
70	Ditzware et al.	2002	Discussion on the Effect of Phosphorus Application in Red Soil from Long-term Location Experiment
71	Zhan Qihou et al.	2006	Study on the sustainable supply capacity and crop response of denatured soil based on long-term positioning experiment
72	Chi Jisheng et al.	2006	Effects of long-term fertilization on crop yield and soil physical and chemical properties
73	Yu Wantai et al.	2007	Contribution of long-term fertilization to crop yield
74	Gao Mingyue et al.	2016	Field Fertilizer Efficiency Test of Corn "3414" in Qihe County in 2015
75	Liu Jiating et al.	2017	2016 "3414" Corn Fertilizer Efficiency Test in Chengdong Town, Guoyang County
76	Wei Zhengmin et al.	2018	Preliminary Report on "3414+1" Fertilizer Efficiency Test of Spring Corn
77	Su Ju et al.	2008	Effects of Combined Application of Nitrogen and Phosphorus on Yield and Physiology of Winter Wheat and Summer Maize in Dryland
78	Wu inheritance et al.	2011	Effects of combined application of nitrogen and phosphorus on corn growth and nutrient utilization
79	Wang Maoju et al.	2016	Summary of Field Test of Corn "3414" Fertilizer in Guanling Autonomous County
80	Wang Maoju	2001	Summary of Field Test of Corn "3414" Fertilizer in Guanling Autonomous County
81	Zhang Dexin et al.	2017	Effects of "3414" fertilization on corn yield and output value in Huadian City
82	Zhang Zhenyong et al.	2011	Statistical Analysis of "3414" Fertilization Efficiency Test Based on R Language
83	Huang Yan et al.	2018	Effects of precipitation and phosphorus application on maize yield and phosphorus absorption and utilization in black soil area
84	gen GY U惠	2013	Effects of Different Phosphate Fertilizer Application Methods on Soil Available Phosphorus and Spring Maize Phosphorus Absorption and Yield
85	Zhou ξ Australia et al.	2007	The effect experiment of nitrogen, phosphorus and potassium fertilizer for southern autumn maize and the discussion on the technical parameters of formula fertilization
86	LAI l i party et al.	2009	Effect of balanced fertilization on spring maize yield and nutrient utilization
87	Yan Chunli et al.	2009	Effect of N, P, and K Fertilizer Application on Summer Maize Yield in Eastern Guanzhong, Shaanxi
88	Yan Chunli et al.	2014	Effect of N, P, and K Fertilizer Application on Summer Maize Yield in Eastern Guanzhong, Shaanxi
89	l iAng Yongdong et al.	2018	Field experiment of sweet corn "3414"
90	Zhou Jiwen	2012	The Fertilization Effect and Recommended Fertilization Quantity of Corn "3414" Experiment in Xingshan
91	Wu Qingliang et al.	2018	Experimental Research on the Fertilizer Efficiency of Maize "3414" in Yulin
92	Zhang Jingfei et al.	2017	Test of 3414 Corn Fertilizer Test
93	Zhang Jingfei et al.	2017	Test of 3414 Corn Fertilizer Test
94	Peng Chang et al.	2008	Effects of long-term fertilization and climatic factors on maize yield in black soil area
95	Li Zhongfang	2009	Characteristics and mechanism of yield evolution of typical farmland crops in my country under long-term fertilization
96	Li Xinran et al.	1991	Study on the Effects of Combined Application of Nitrogen and Phosphorus Fertilizers on Corn Yield and Economic Benefits
97	Lu Shuchang et al.	2000	Study on Effect of Phosphorus Application on Summer Maize in Northern Chao Soil
98	He Ping et al.	2005	Effects of phosphorus application on phosphorus absorption characteristics and quality of high-oil corn and common corn
99	Liu Jianling etal.	2000	Changes of Soil Phosphorus Pool in Long-term Fertilizer Positioning Experiment of Wheat-corn Rotation
100	Ma et al	2012	The influence of mineral fertilization and crop sequence on sustainability of corn production in northeastern China
