# Supplementary material for: Understanding variability in maize yield response to phosphorus fertilizer in Africa and China: Meta-analysis
Source: Research Square preprint supplement (doi:10.21203/rs.3.rs-1672011/v1), 2022-06-02
Supplement: Supplementary file 2 [file ae2d7dd78ec135fefc3bdcab.docx]

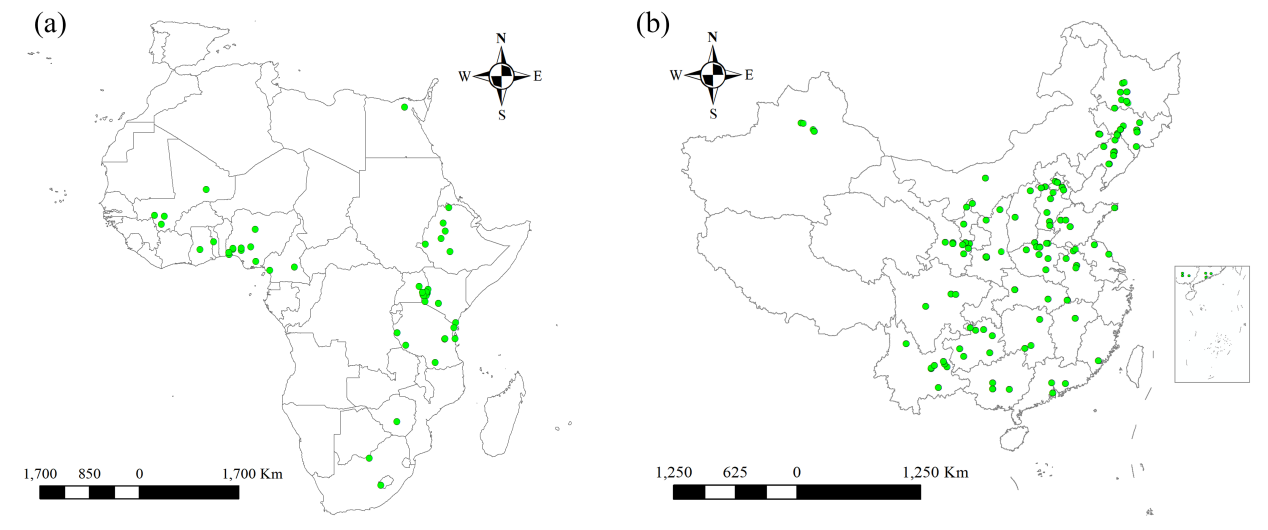


Figure S1. Distribution of case studies in meta-analysis (a) Africa and (b) China


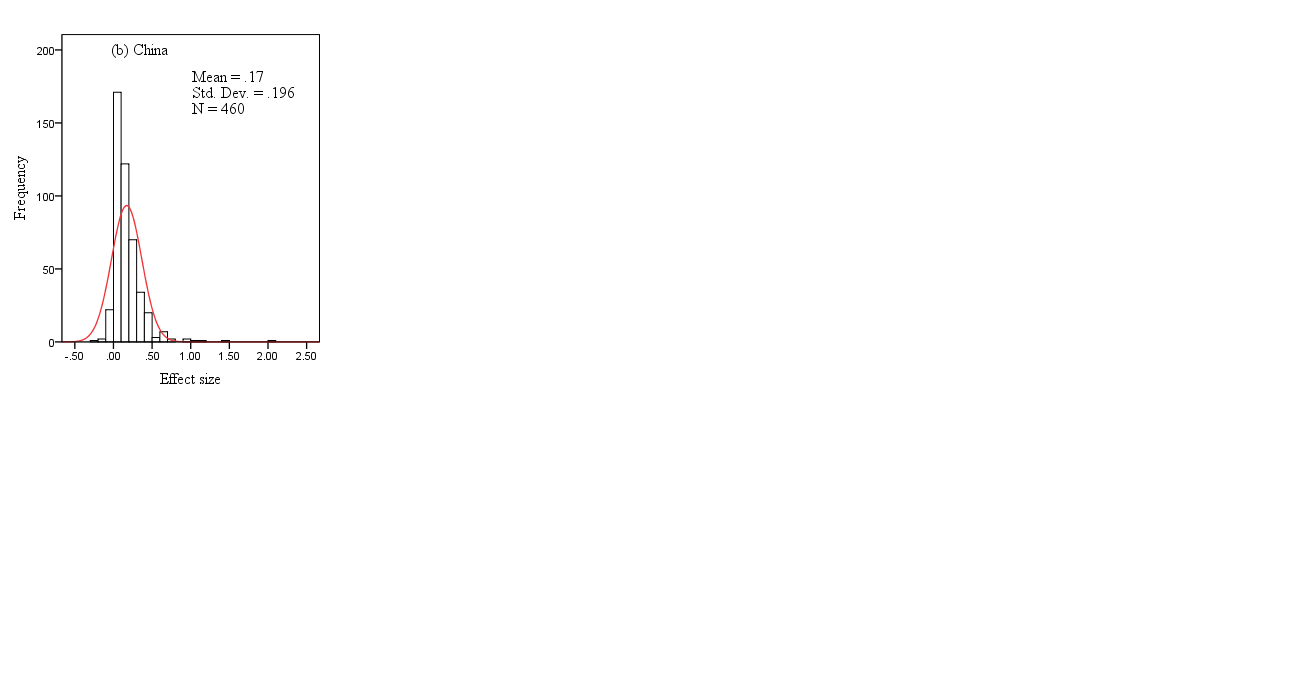

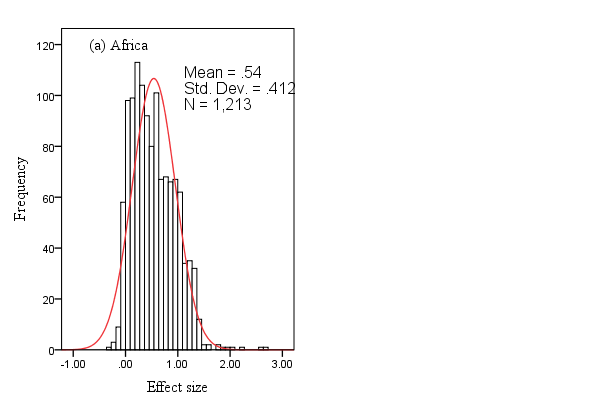


Figure S2. Frequency distribution of the response ratio (RR, the effect of fertilizer rate on yield) among all observations in the overall dataset RR = ln (yield treatment/yield control), where yield treatment and yield control were the yield of plots with P nutrient and nutrient omission, respectively.


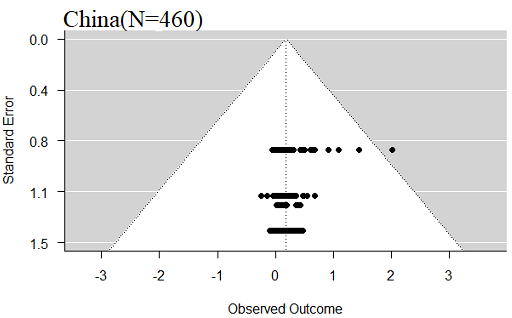

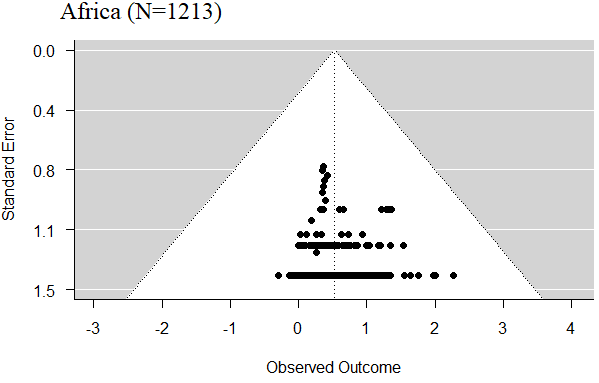


Figure S3. The funnel plot indicating the publication bias of the studies in Africa and China using random effect model.
